# Supplementary material for: [2.2]Paracyclophane-based carbene–copper catalyst tuned by transannular electronic effects for asymmetric boration
Source: Royal Society of Chemistry journal article supplement (doi:10.1039/c6ra14404g), 2016-01-01

[2.2]Paracyclophane-based carbene-copper catalyst tuned by transannular  
electronic effects for asymmetric boration

Jianqiang Chen<sup>a</sup>, Wenzeng Duan<sup>c</sup>, Zhen Chen<sup>a</sup>, Manyuan Ma<sup>b</sup>, Chun Song<sup>\*b</sup>, and Yudao Ma<sup>\*a</sup>

<sup>a</sup>*Department of Chemistry, Shandong University, Shanda South Road No. 27,*

*Jinan 250100, P. R. China;[\*] ydma@sdu.edu.cn;*

<sup>b</sup>*School of Pharmaceutical Sciences, West Wenhua Road No. 44, Jinan 250012, China; [\*]*

*chunsong@sdu.edu.cn;*

<sup>c</sup>*School of Chemistry and Chemical Engineering, Liaocheng University, Hunan Road No. 1, Liaocheng  
252000, China.*

**Electronic Supplementary Information**

**Table of Contents**

|                                                      |     |
|------------------------------------------------------|-----|
| 1. General information.....                          | S2  |
| 2. NMR spectra and HPLC chromatograms.....           | S3  |
| 3. The comparative kinetic study of the ligands..... | S58 |

## 1. General Information

All manipulations of oxygen- and moisture-sensitive materials were conducted with a standard Schlenk technique under a purified argon atmosphere. Solvents were reagent grade and purified by standard techniques.  $^1\text{H}$  and  $^{13}\text{C}$  NMR spectra were recorded on a 300 MHz spectrometer. Chemical shifts were reported as  $\delta$  values in ppm and referenced to using tetramethylsilane as an internal. Data are reported as (s = singlet, d = doublet, dd = doublet of doublet, ddd = doublet of doublet of doublet, t = triplet, dt = doublet of triplet, td = triplet of doublet, q = quartet, qd = quartet of doublet, m = multiplet, brs = broad singlet). All high resolution mass spectra were obtained on an Accurate-Mass LC-ESI-Q-TOF-MS. All reactions were monitored by TLC with silica gel-coated plates and visualized with a UV light at 254 nm. Optical rotations were reported as follows:  $[\alpha]_{\text{D}}^{\text{T}}$  (c = g/100 mL, solvent).

## 2. NMR spectras and HPLC chromatograms

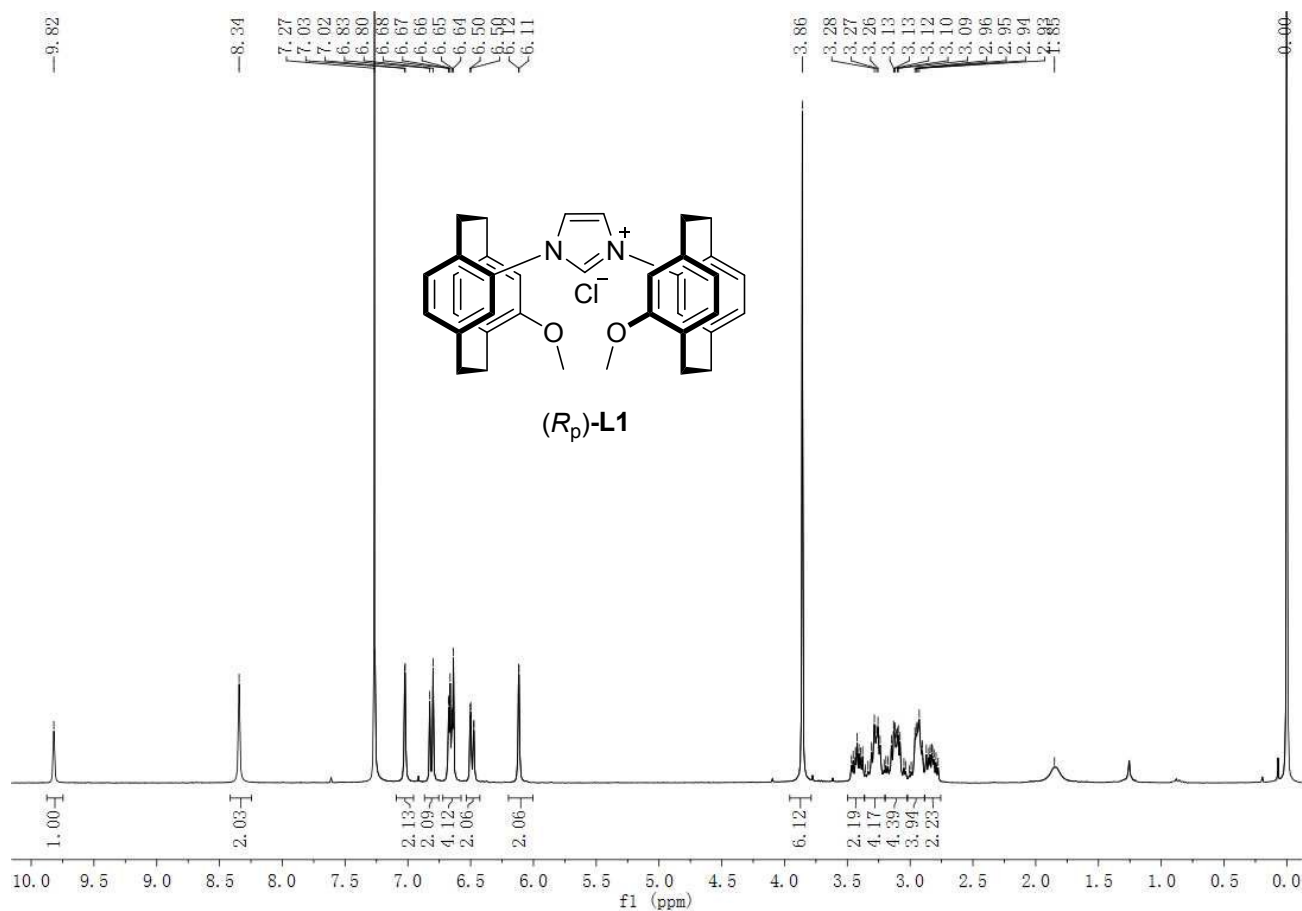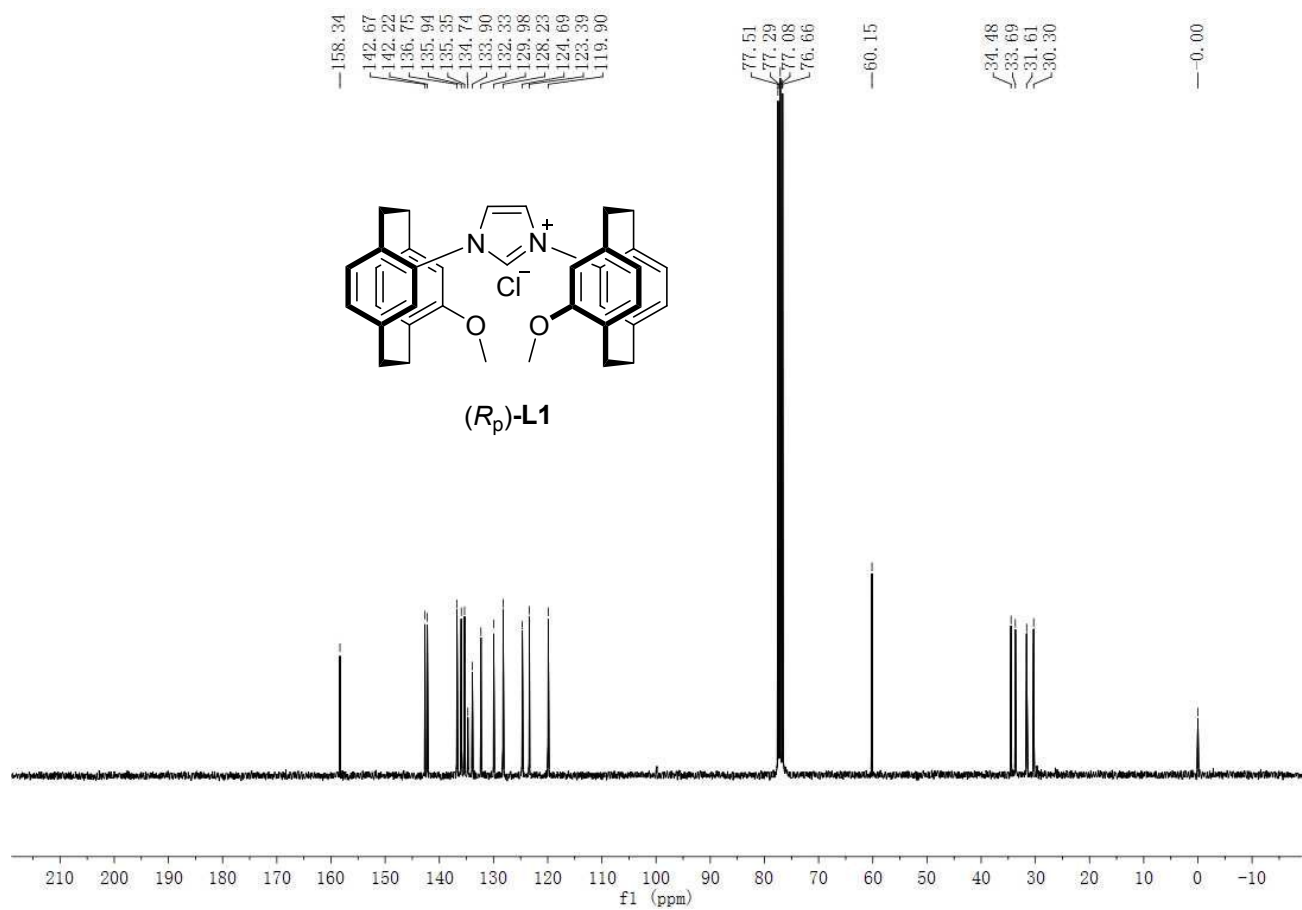

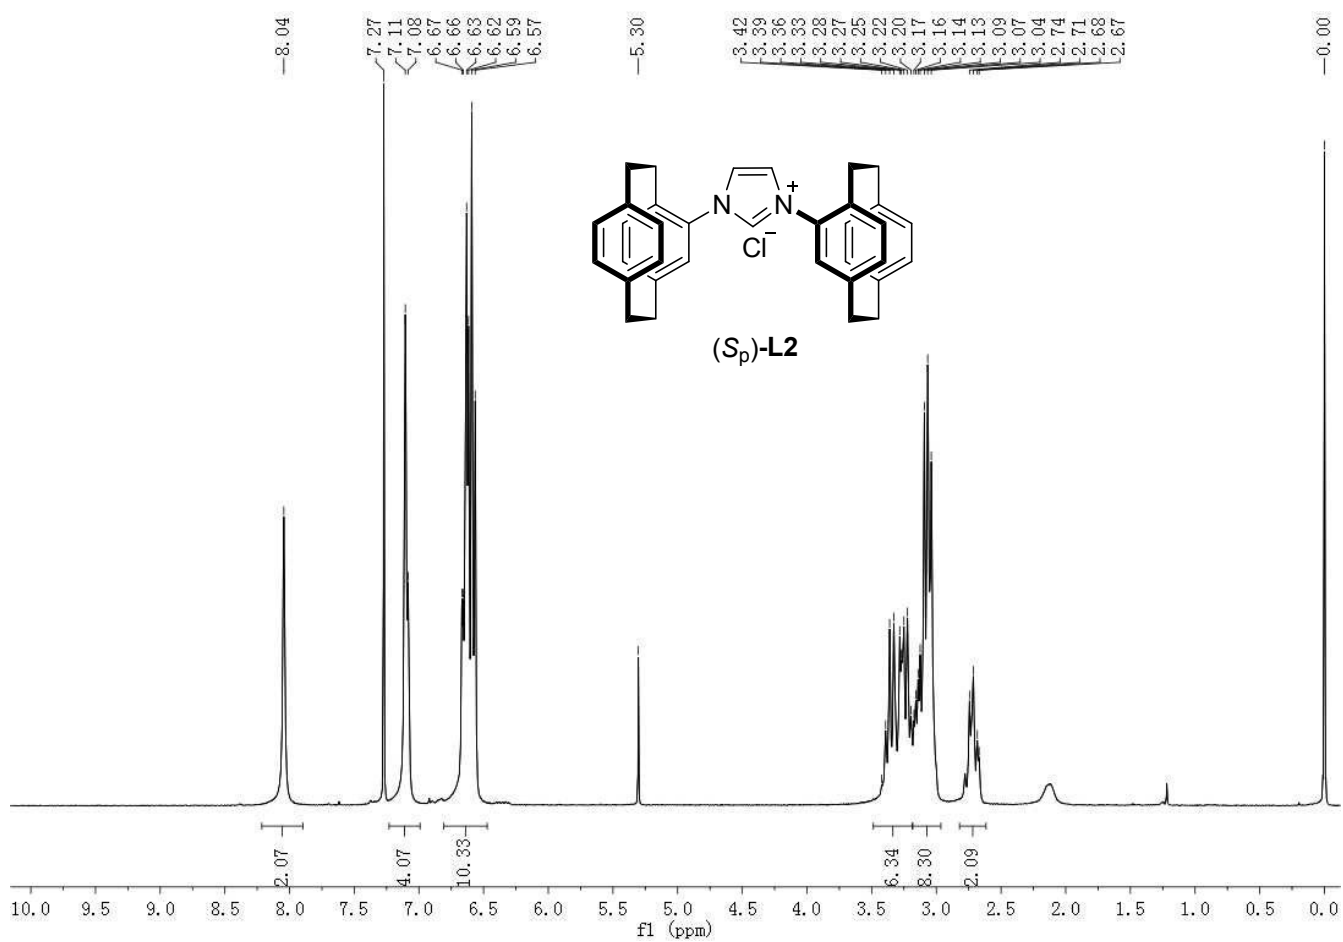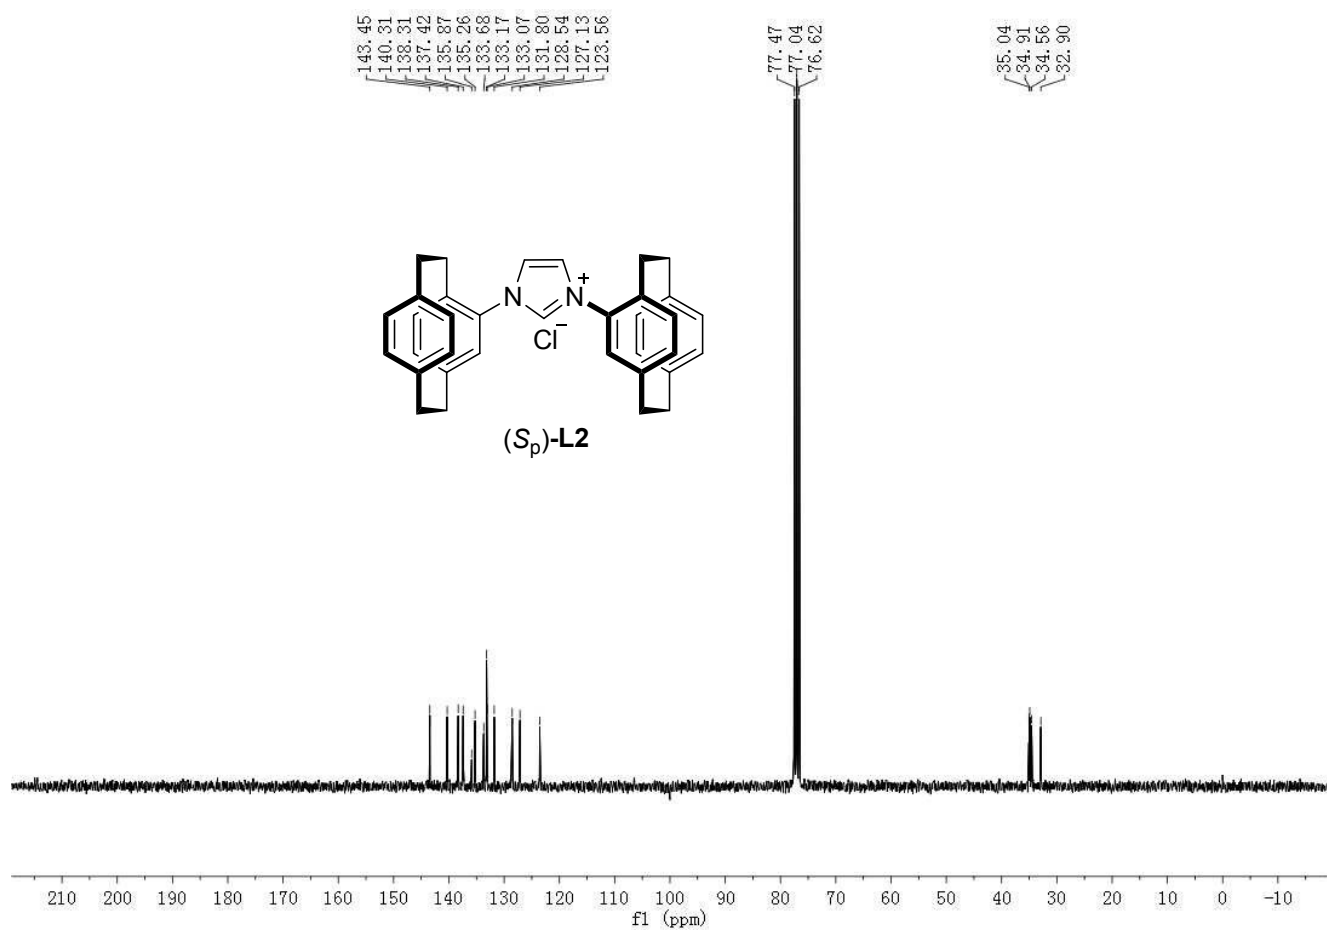

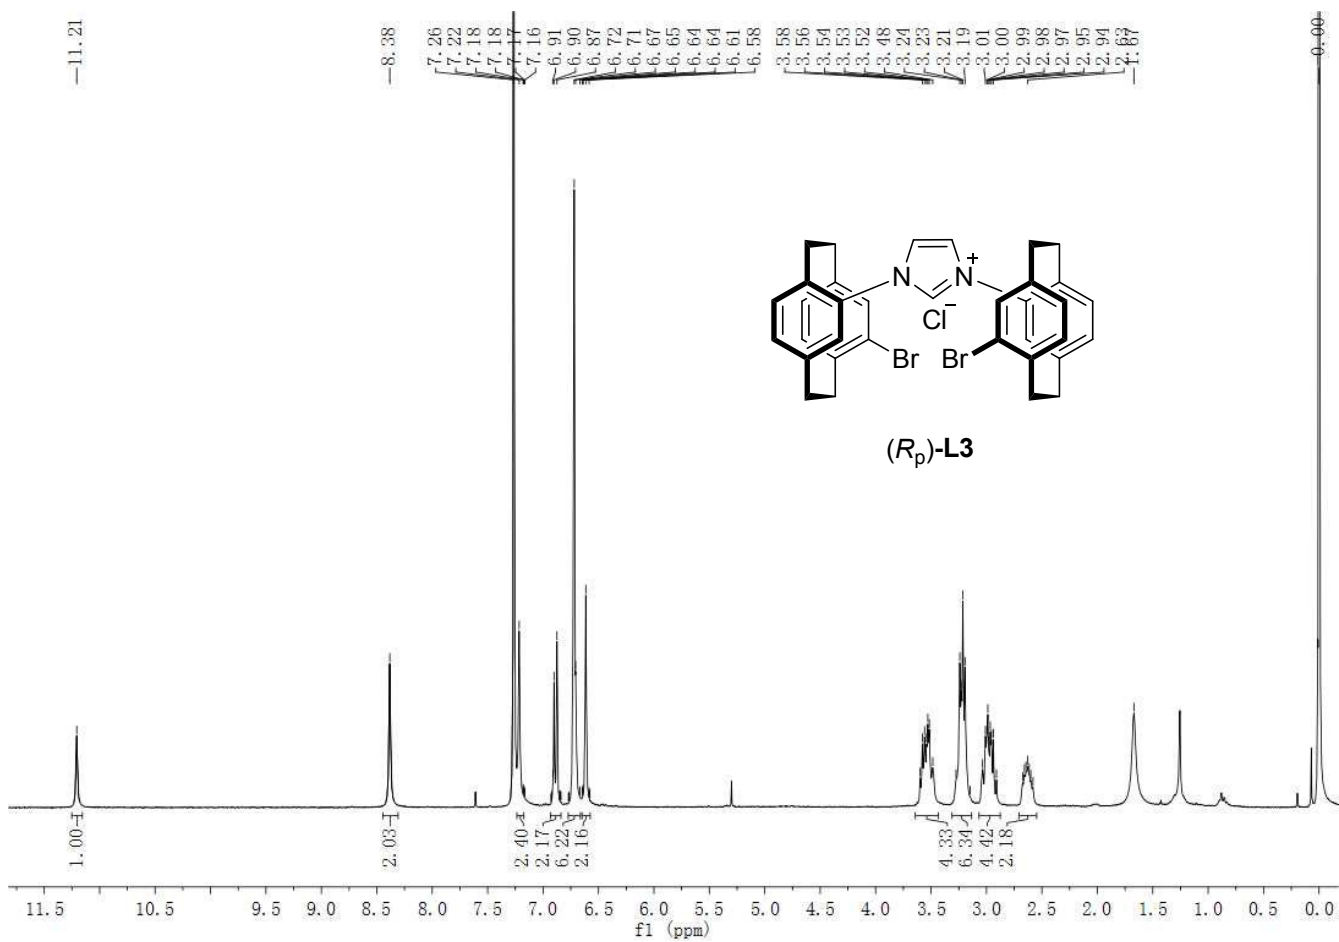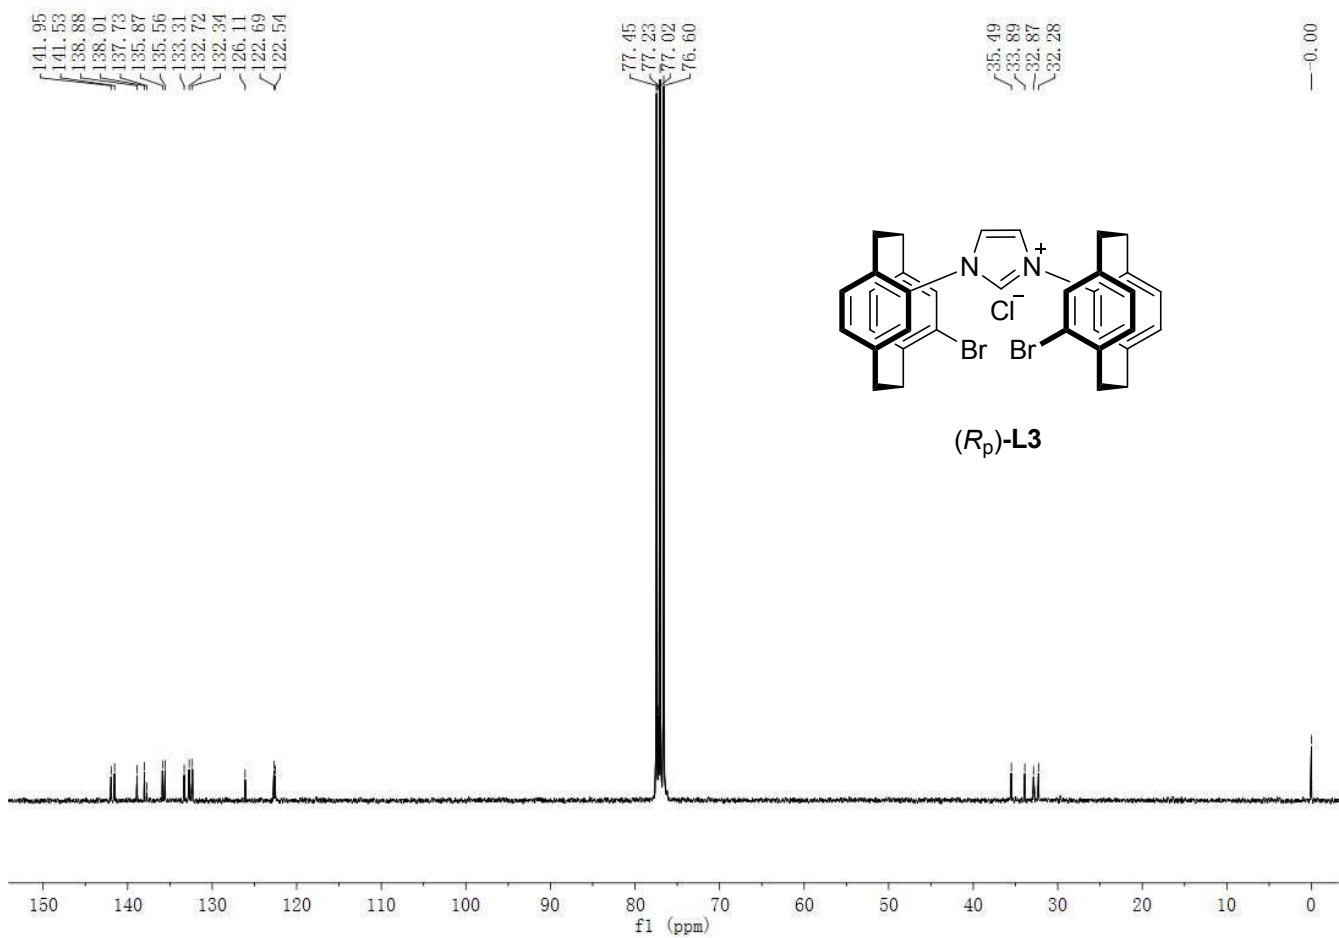

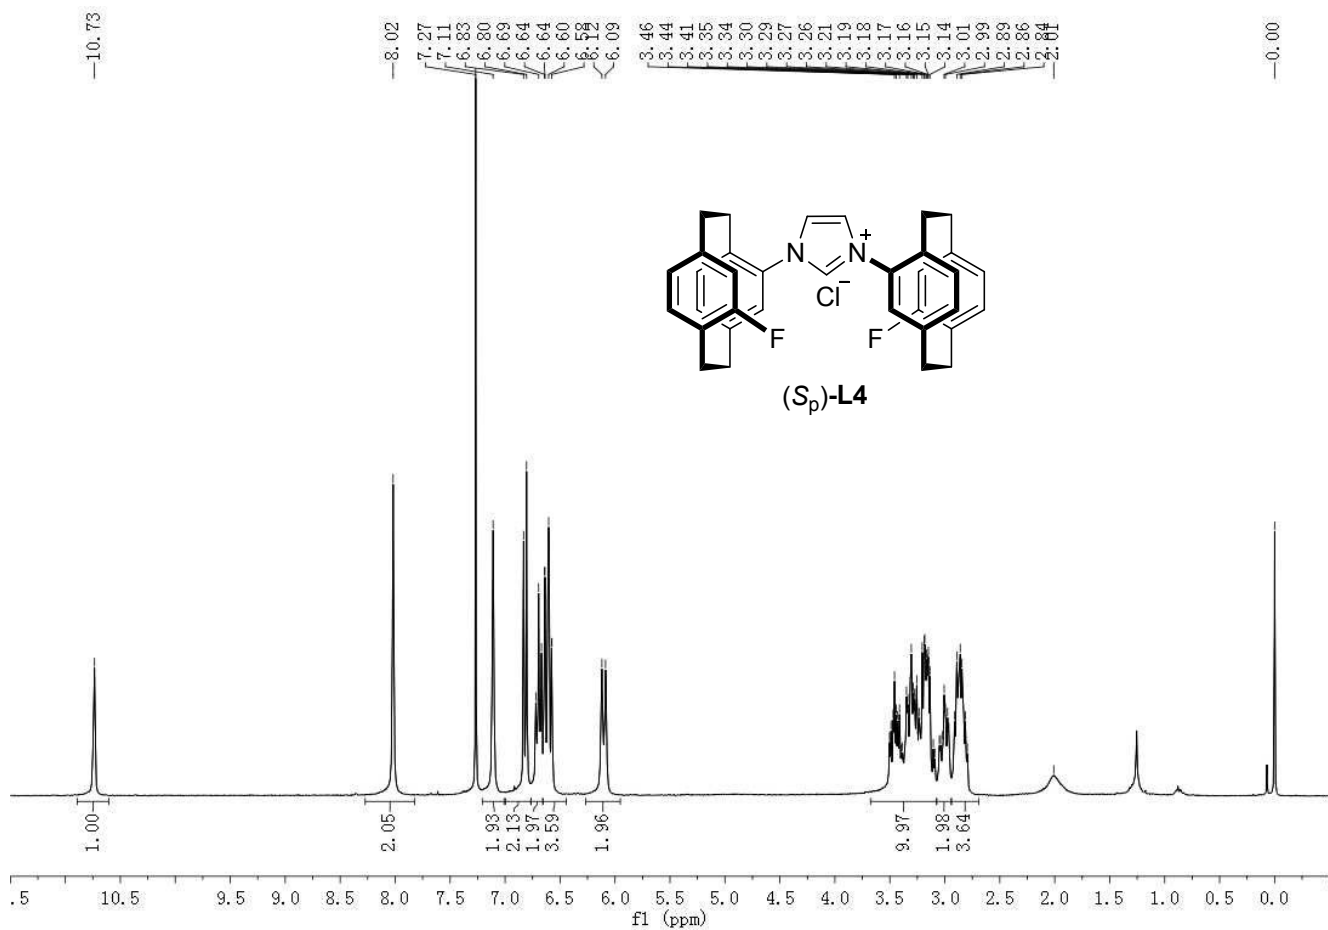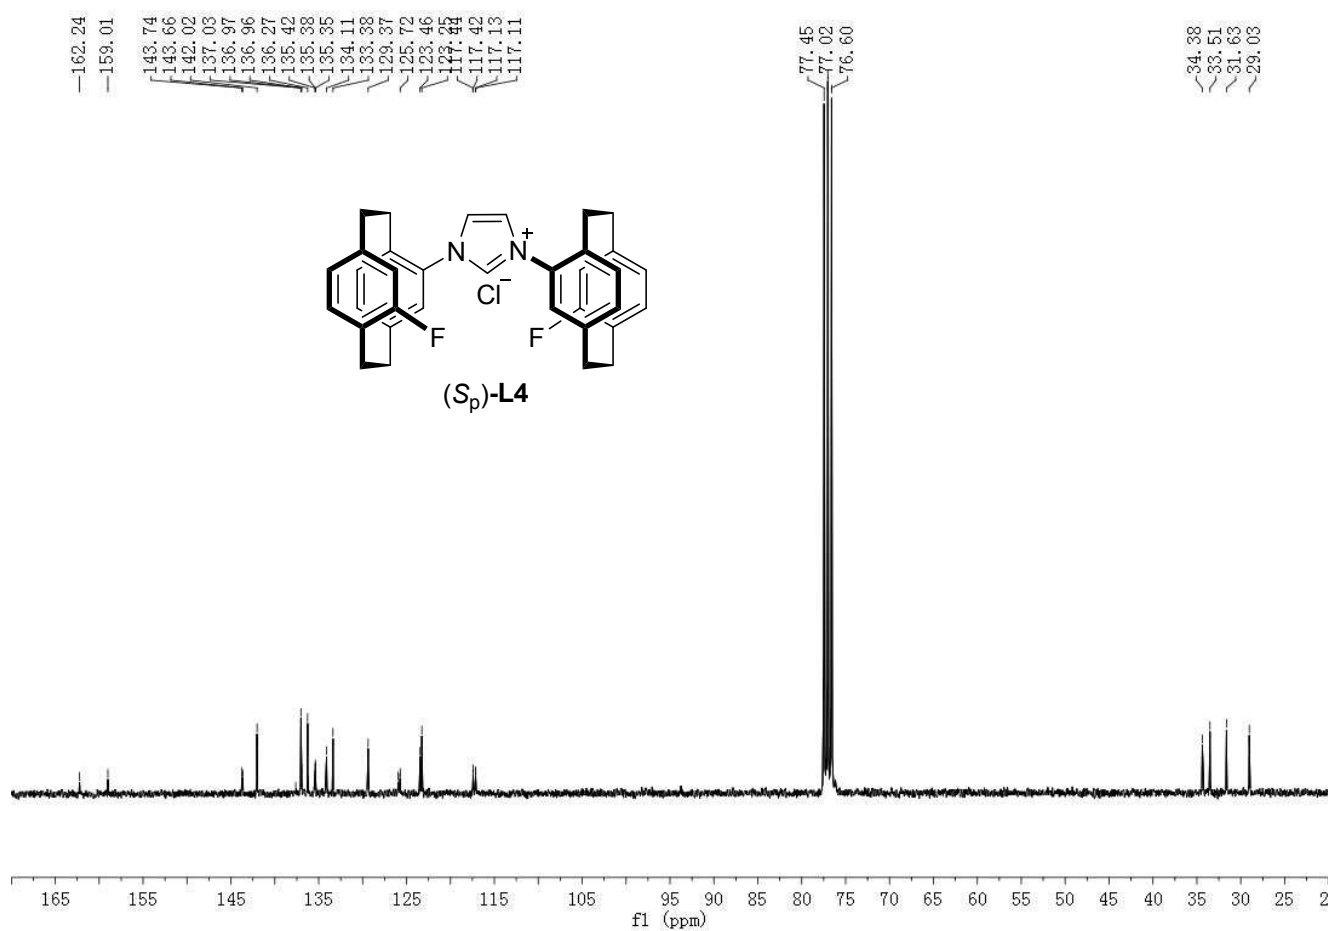

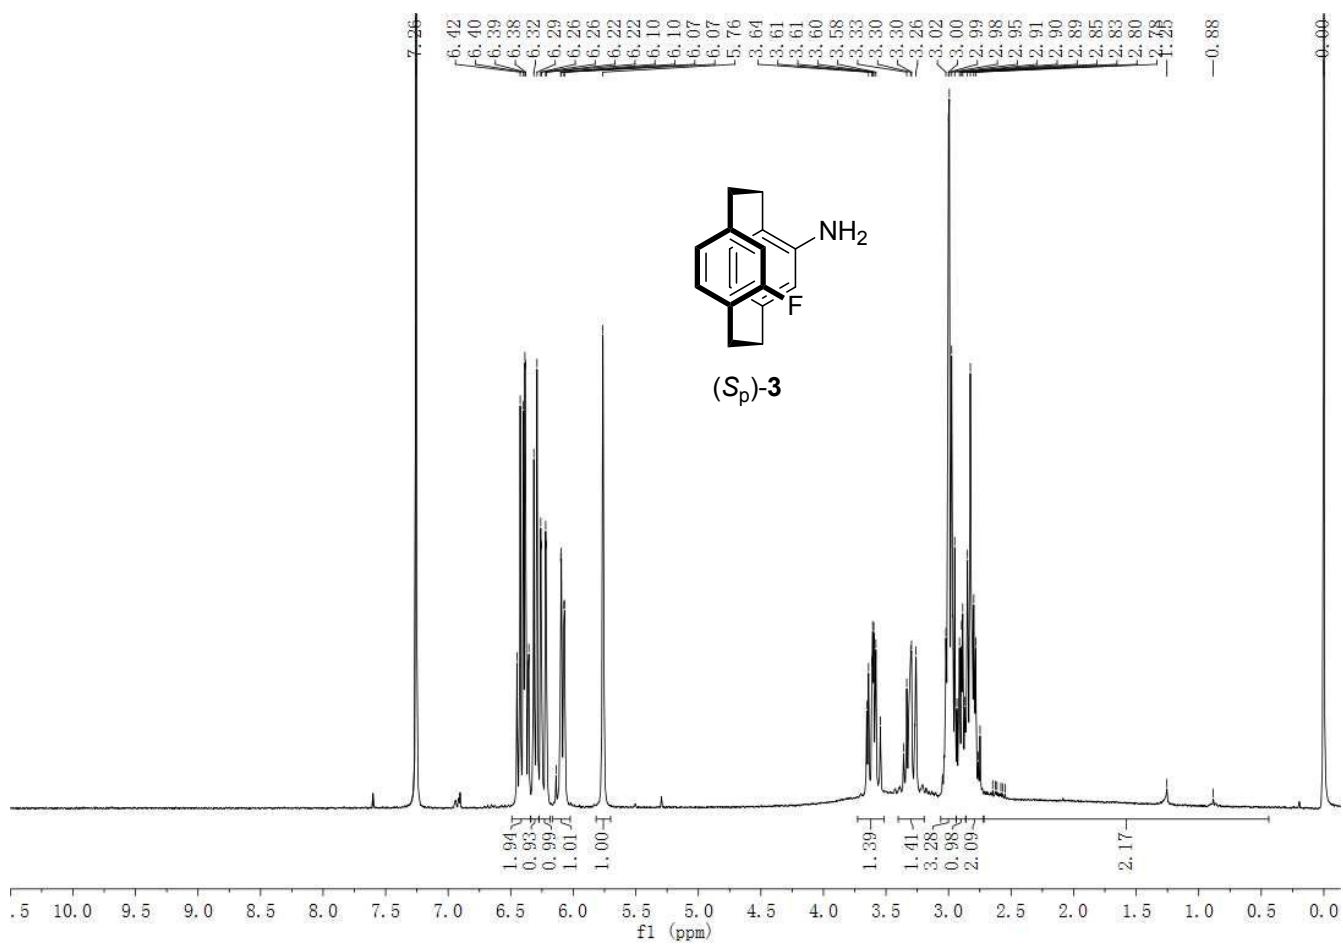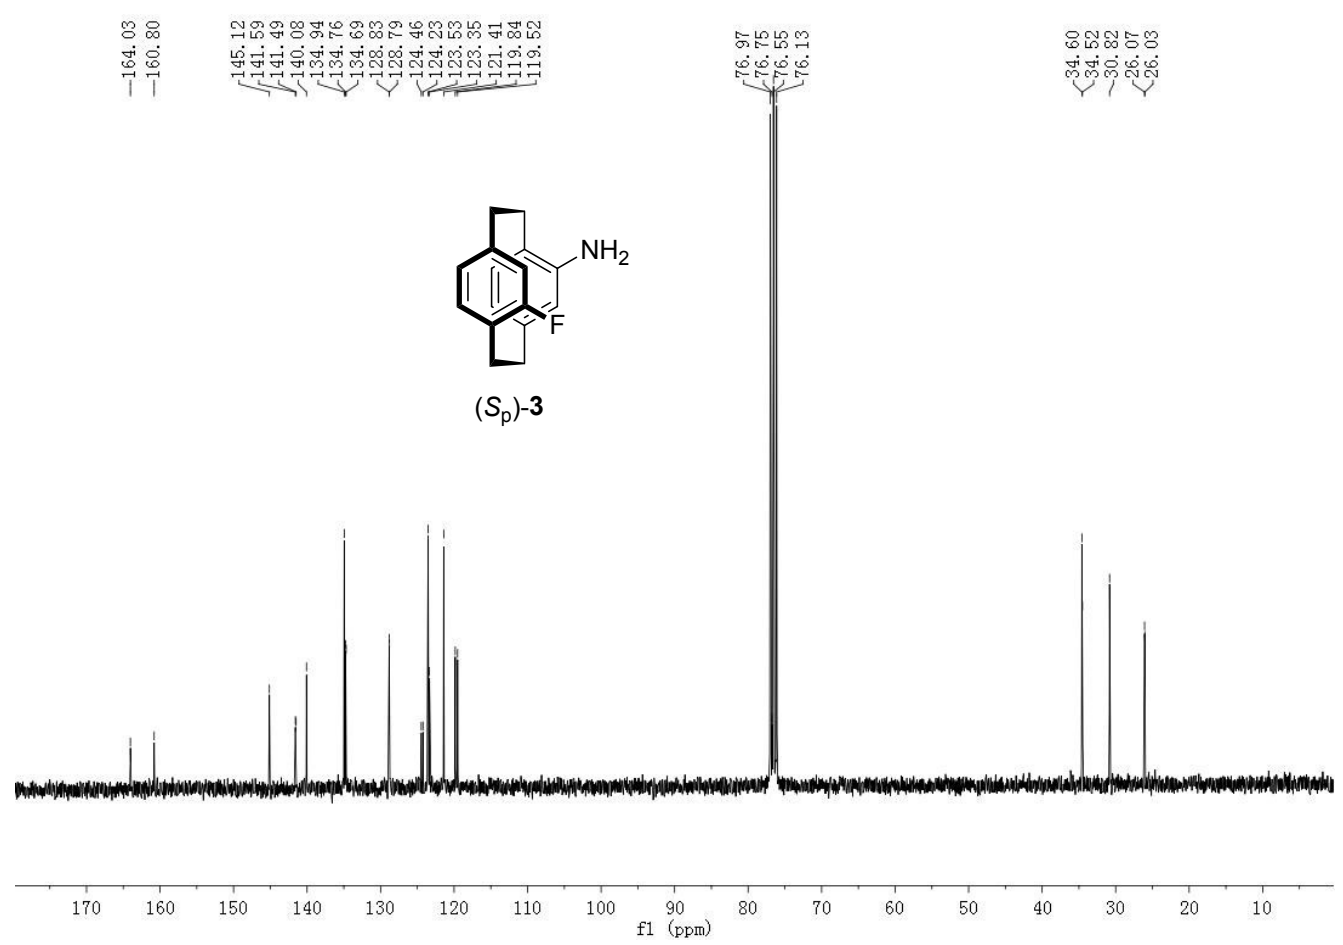

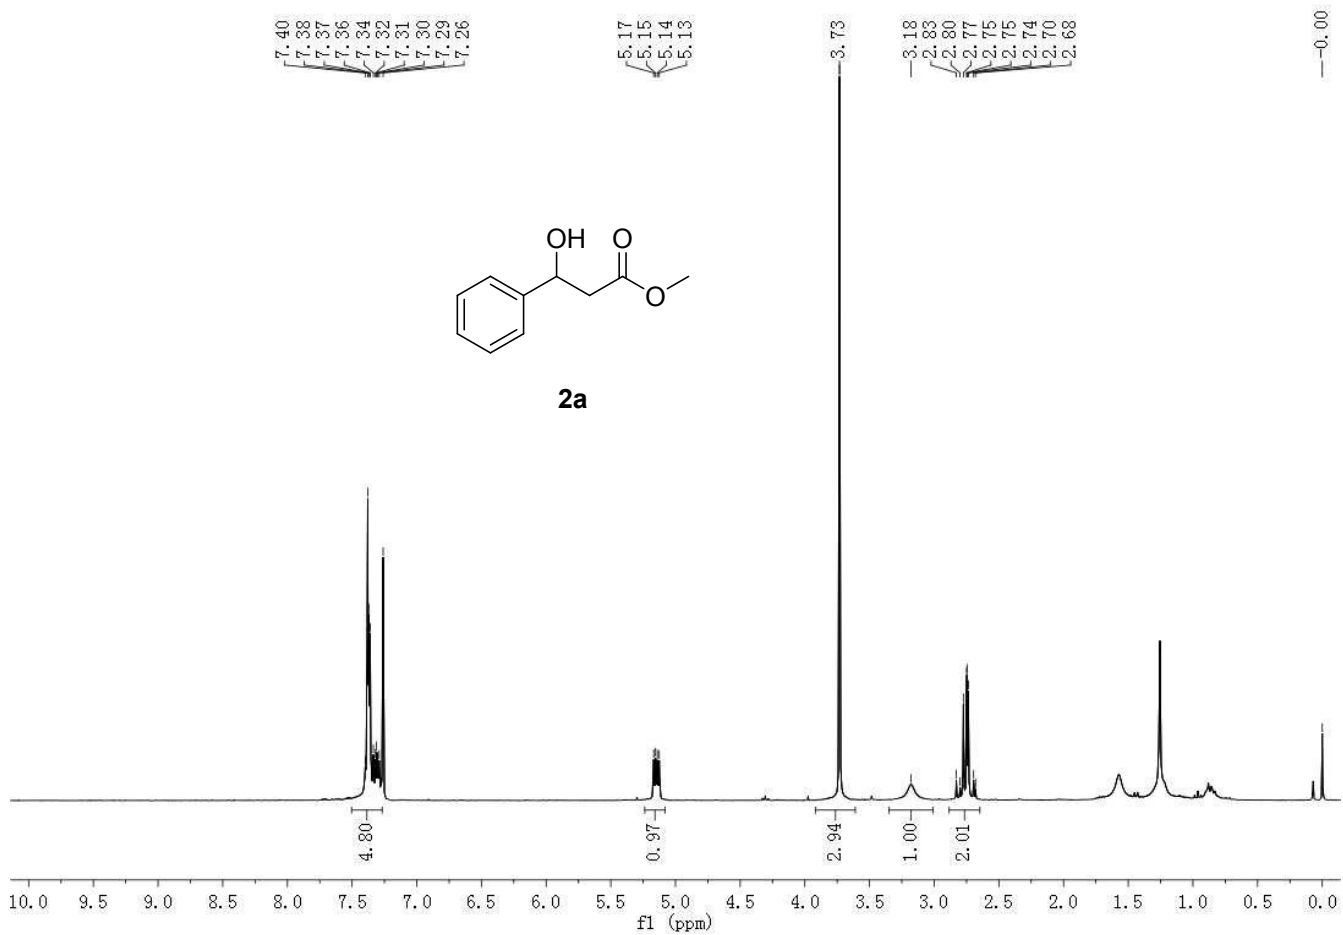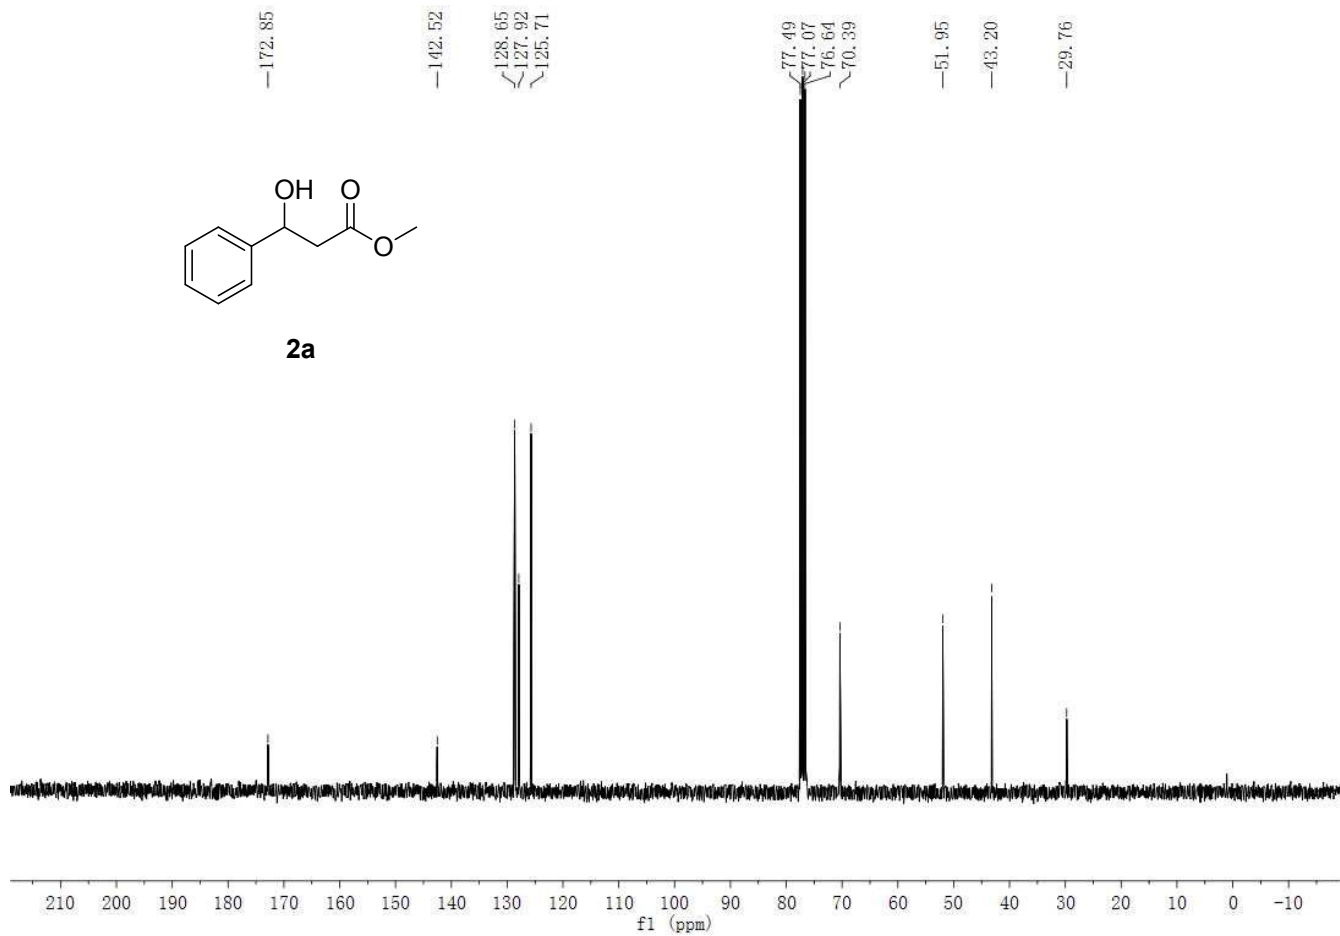



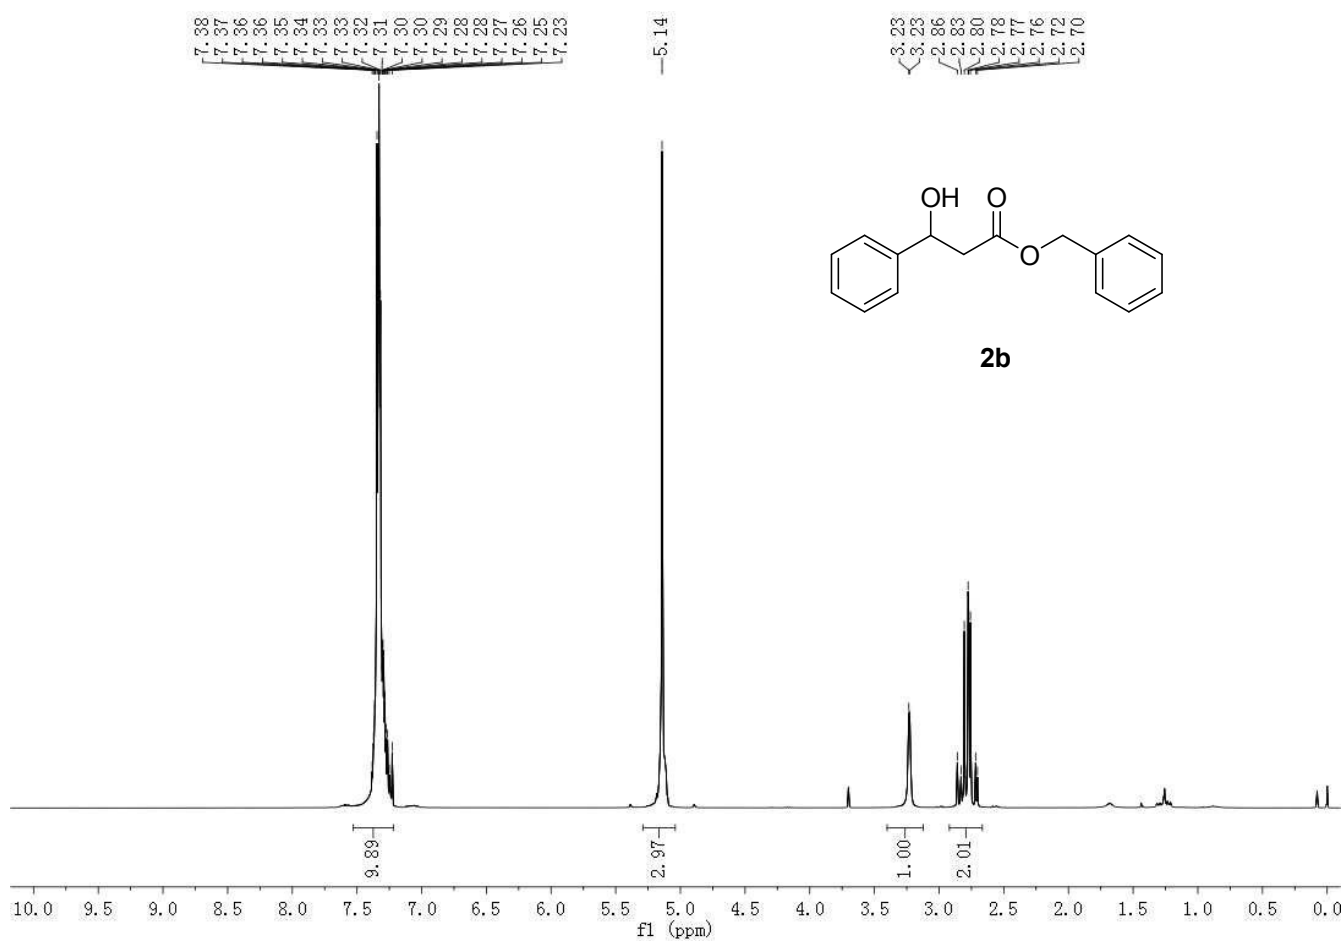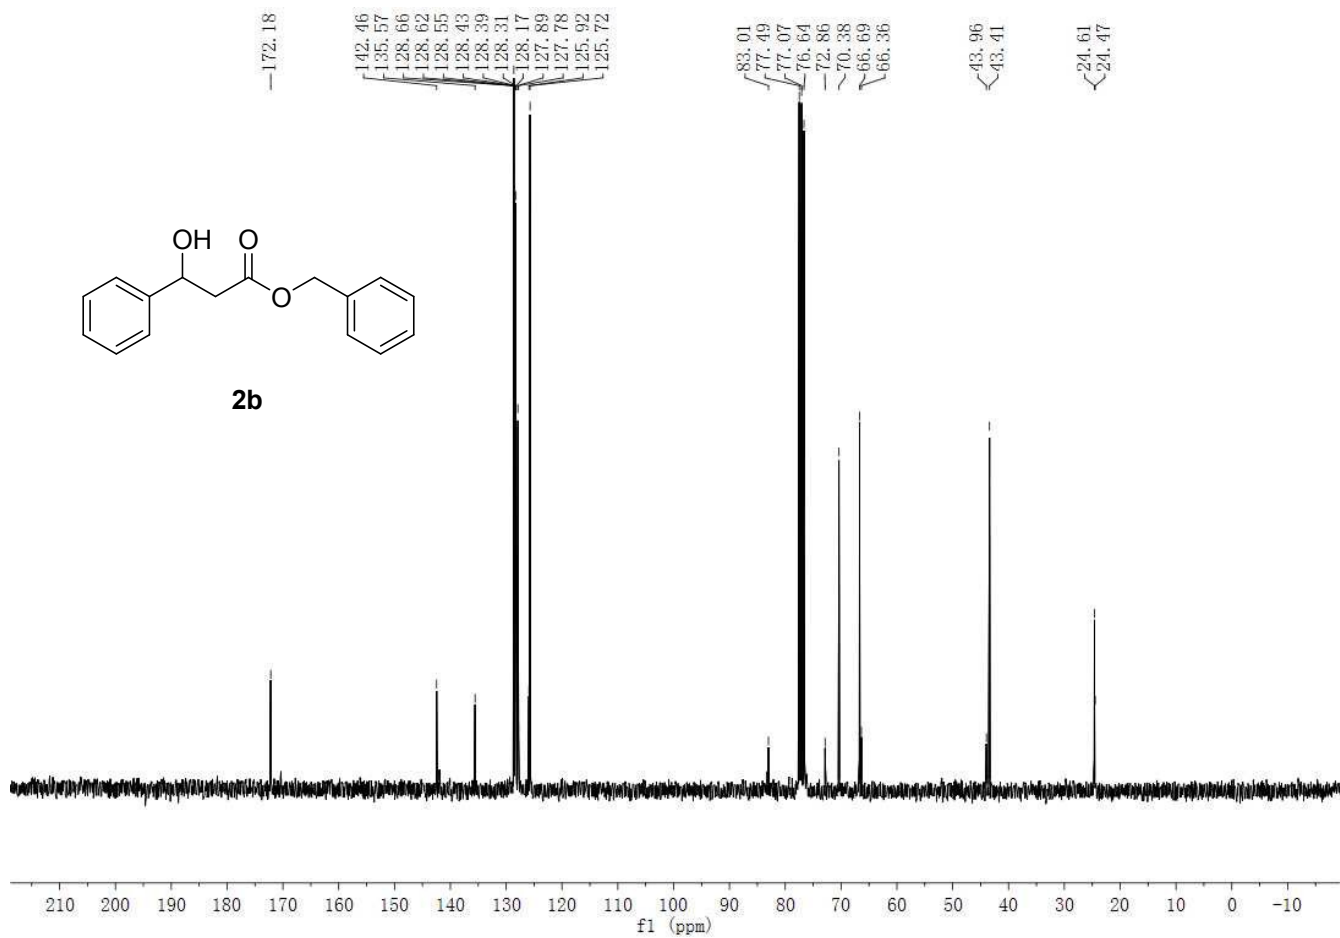

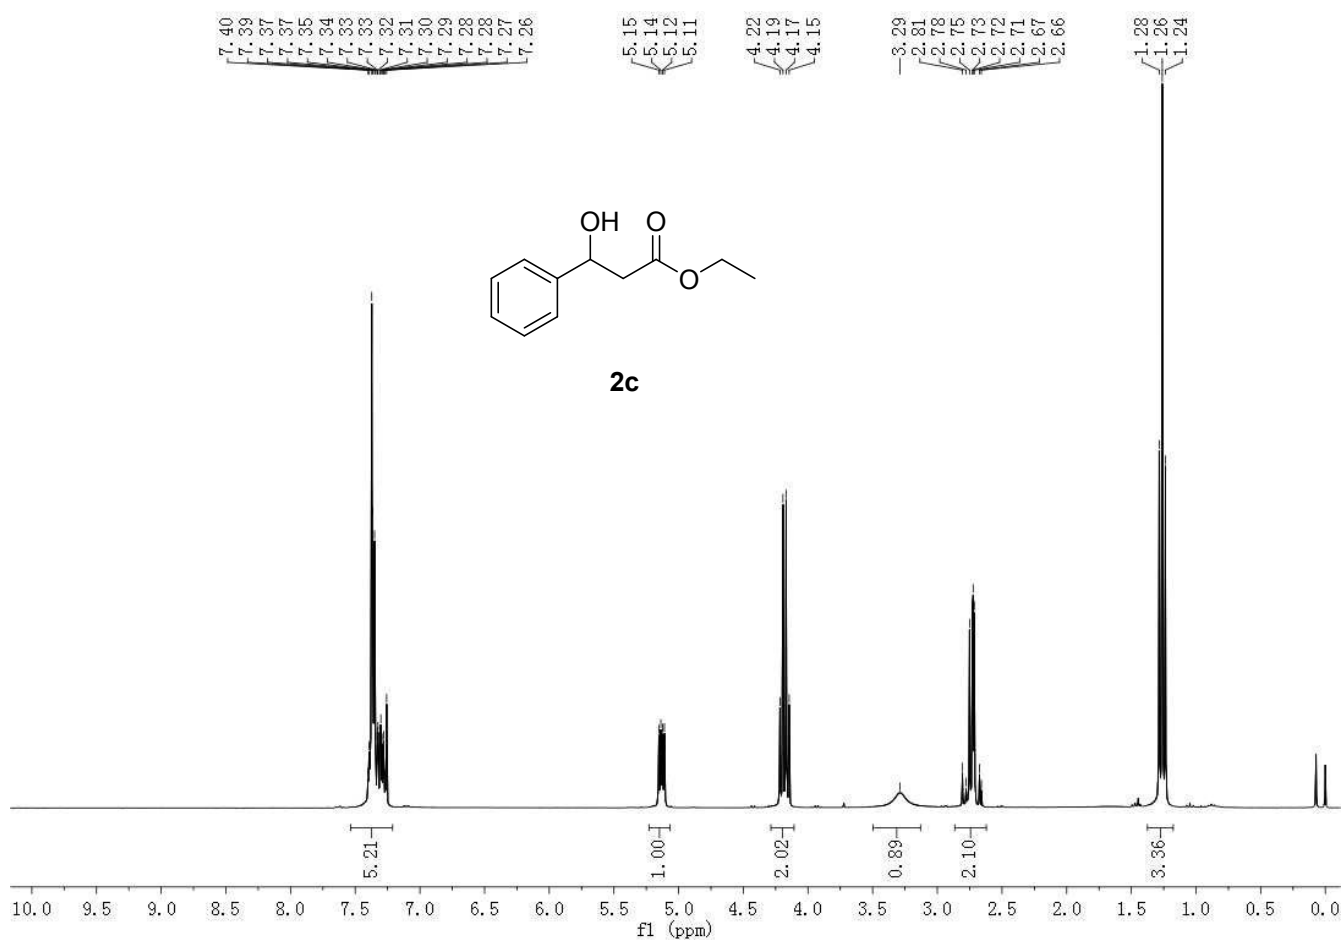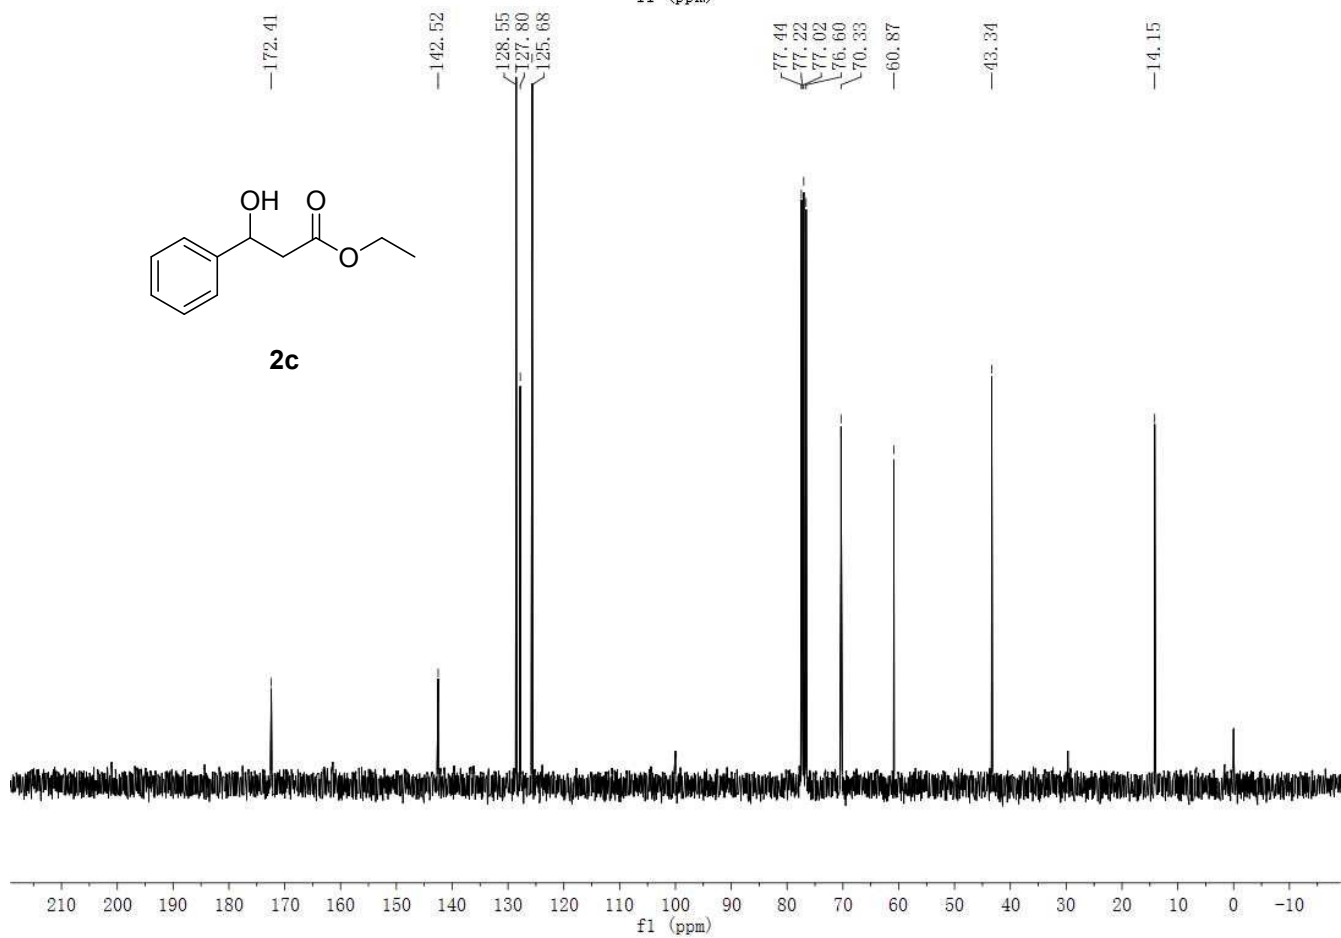

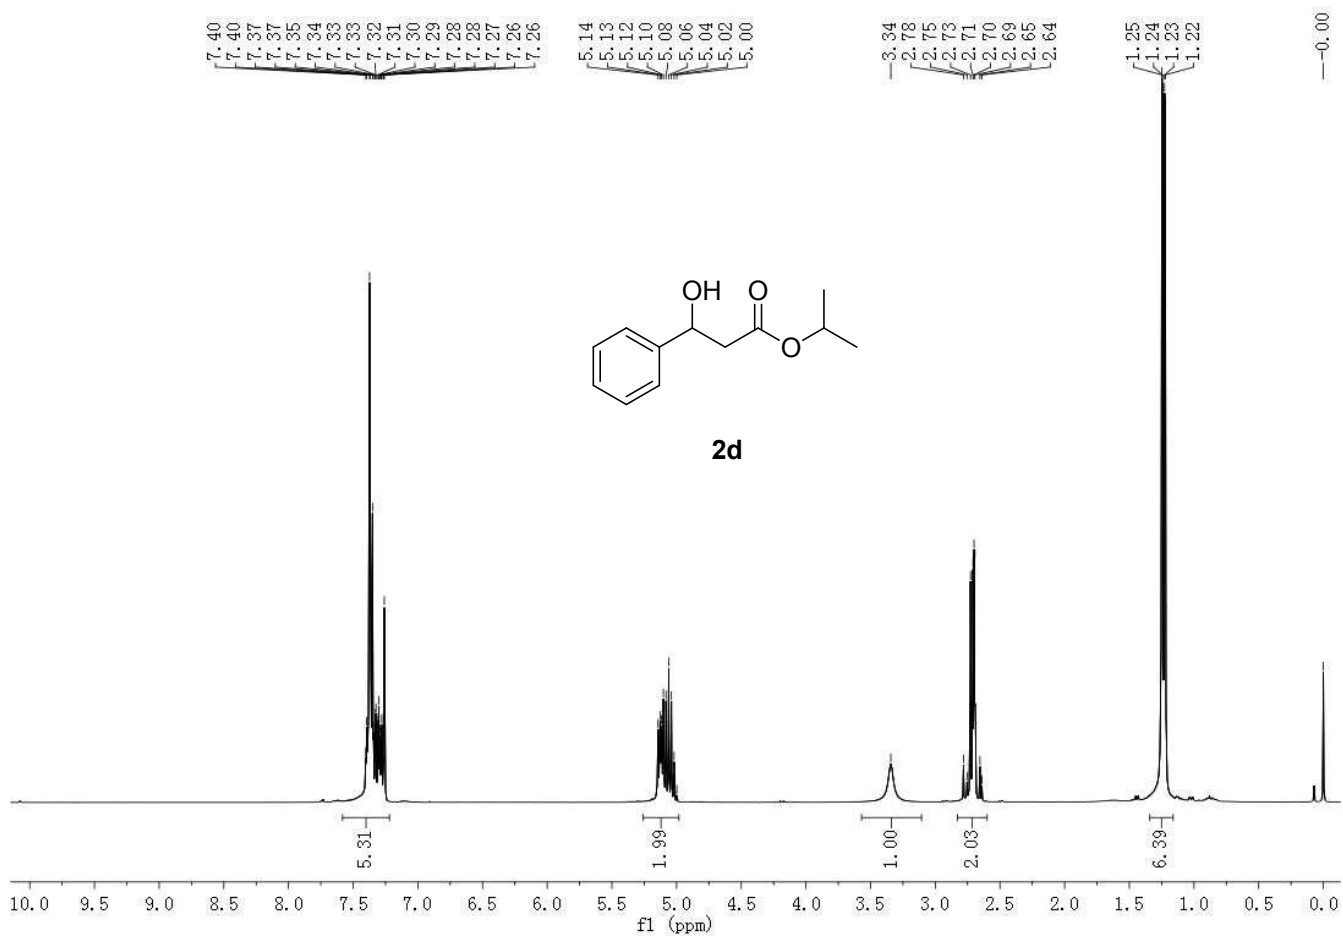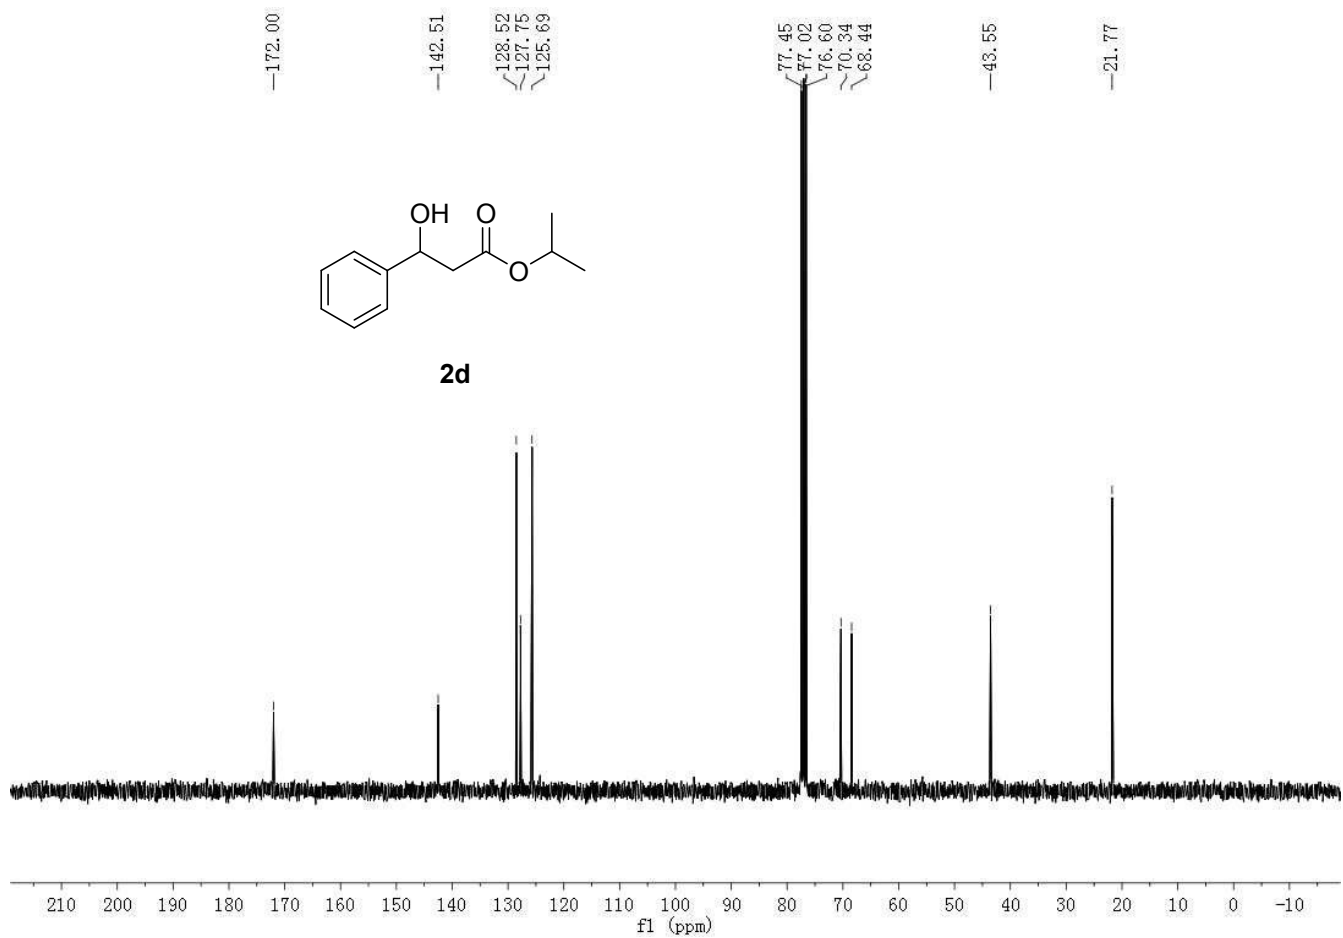

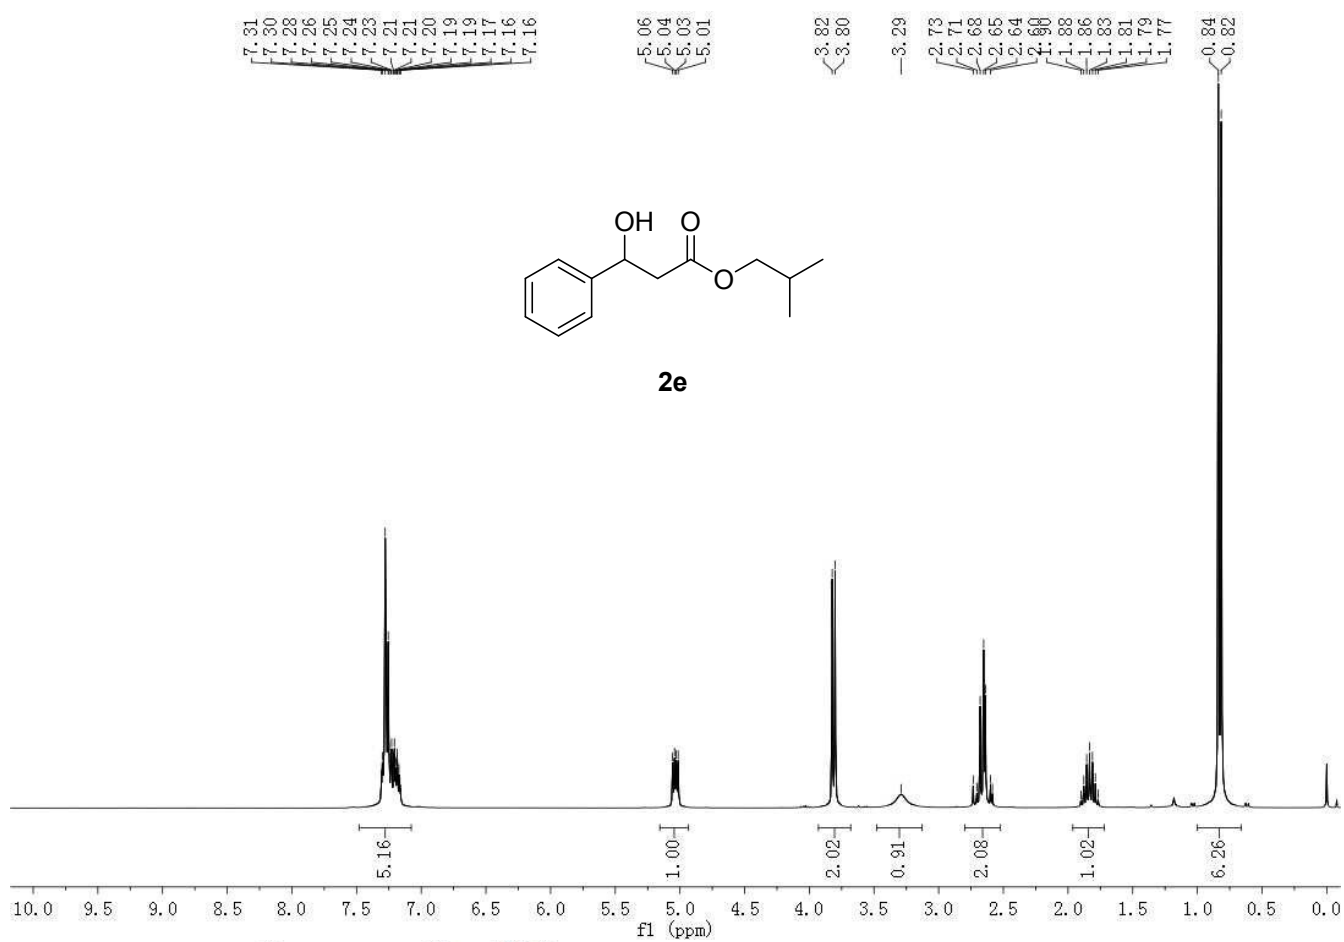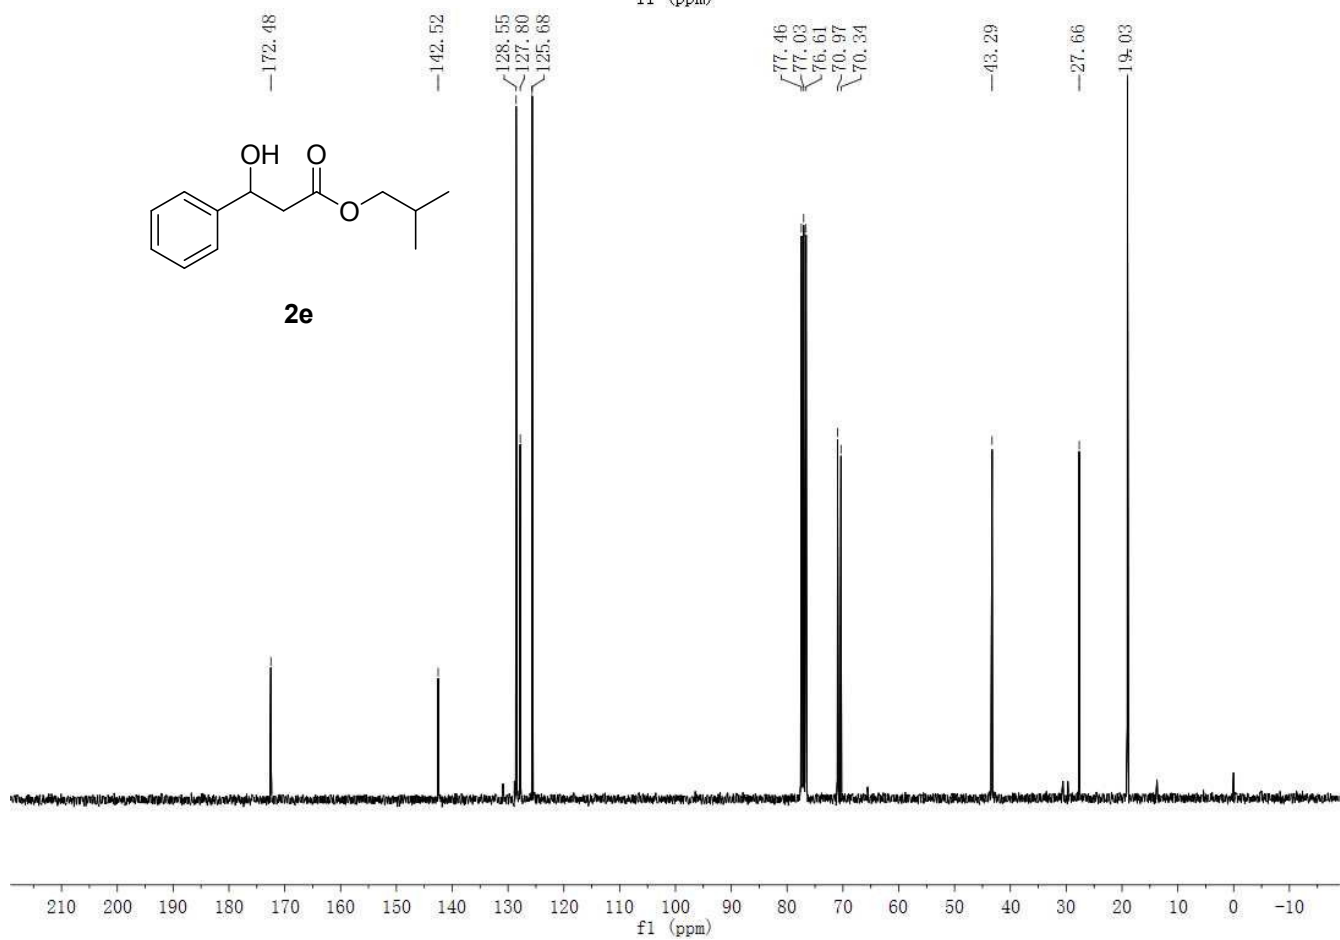

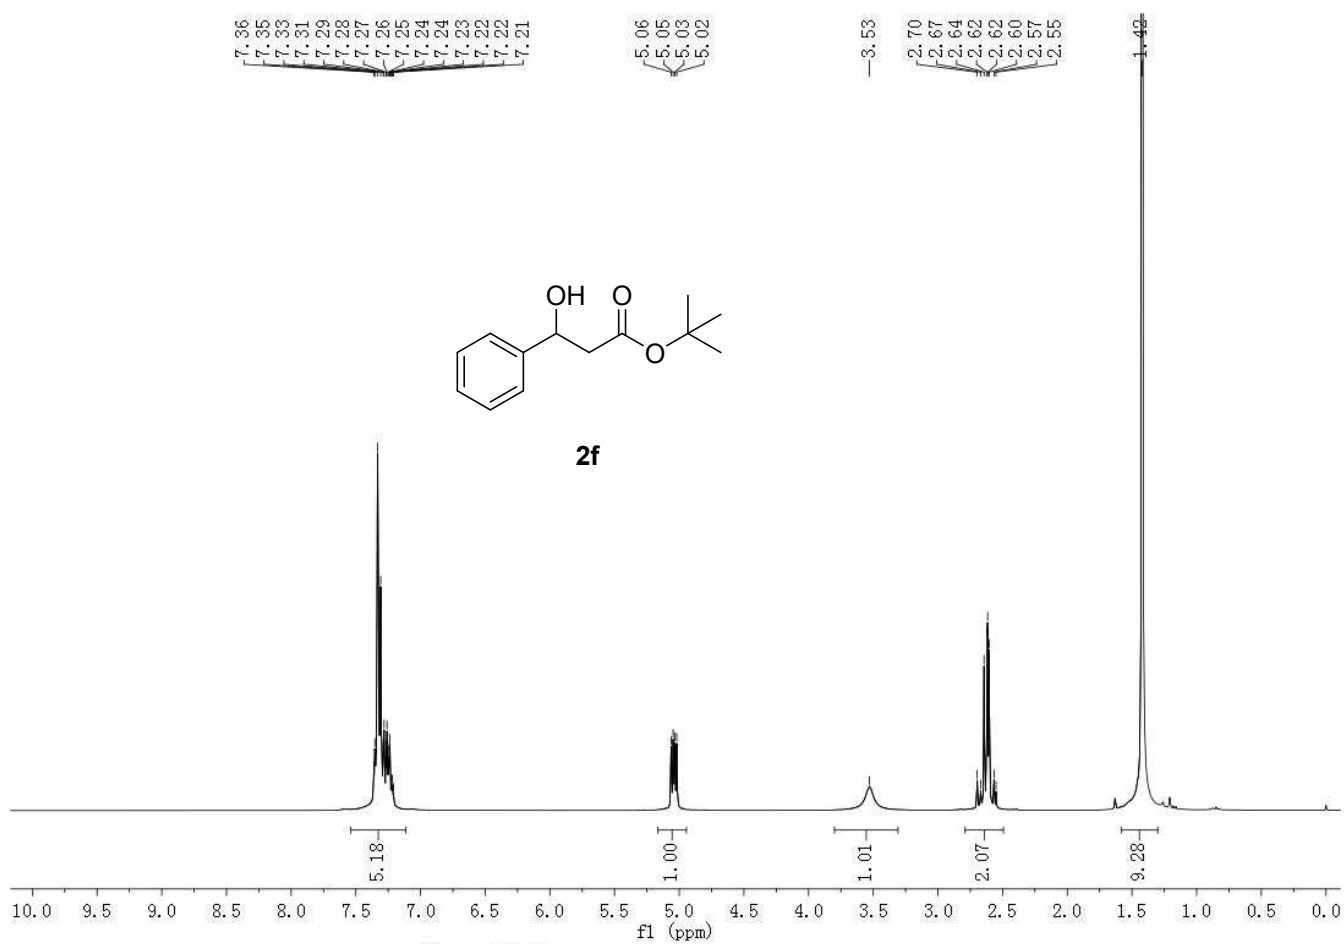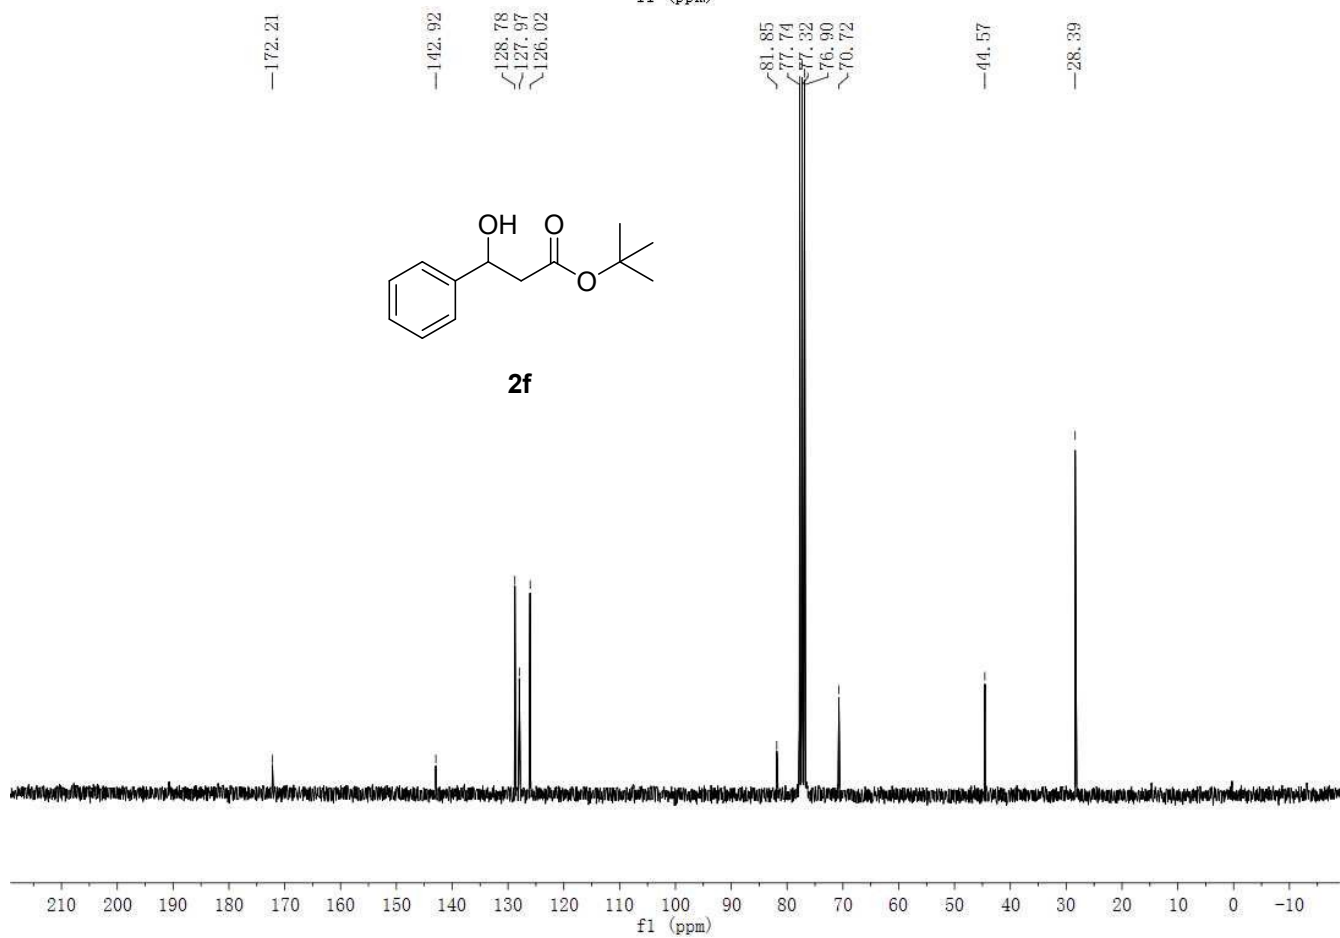

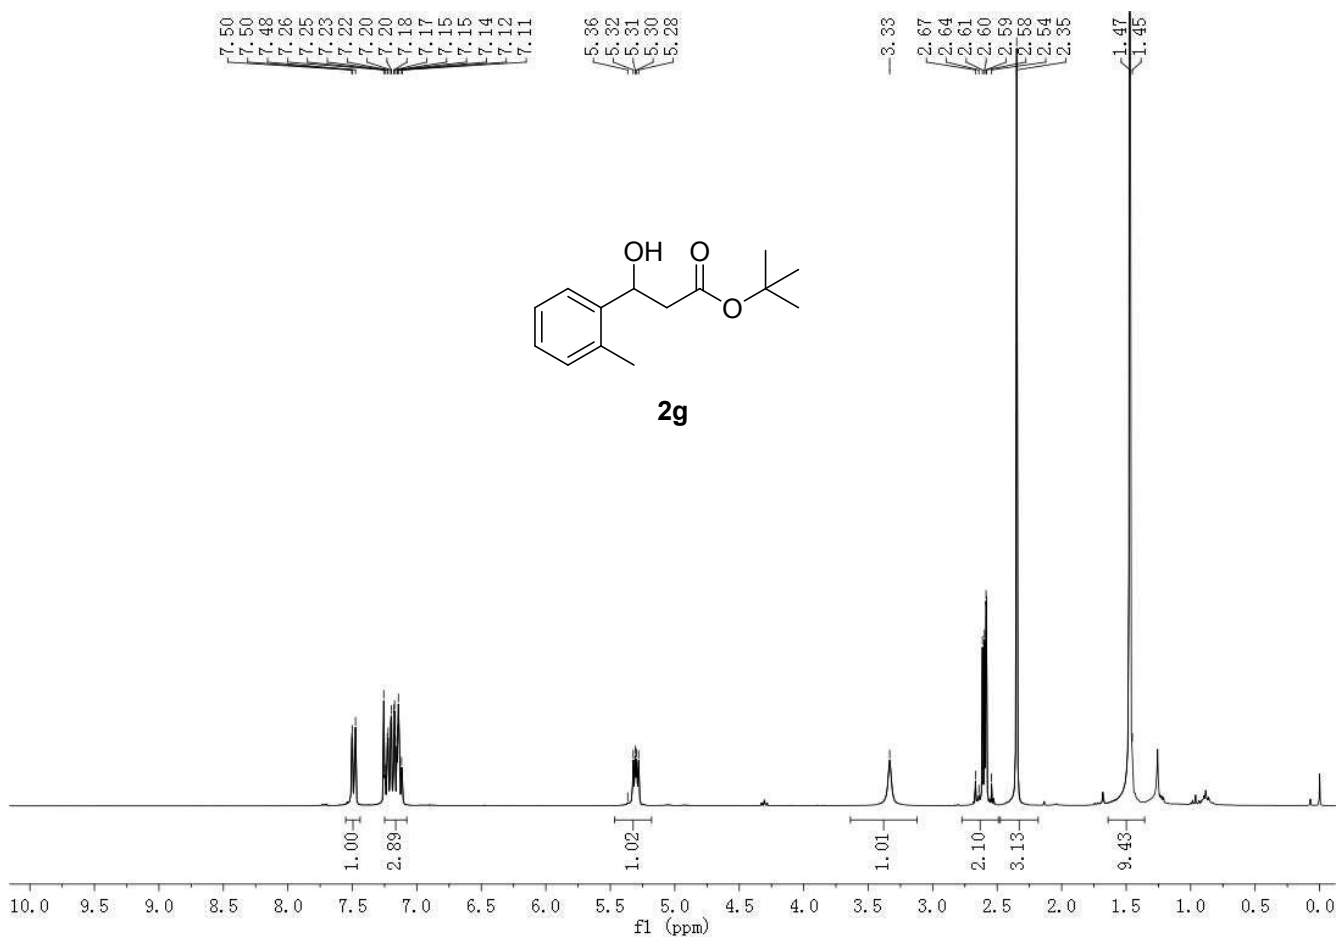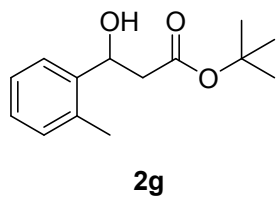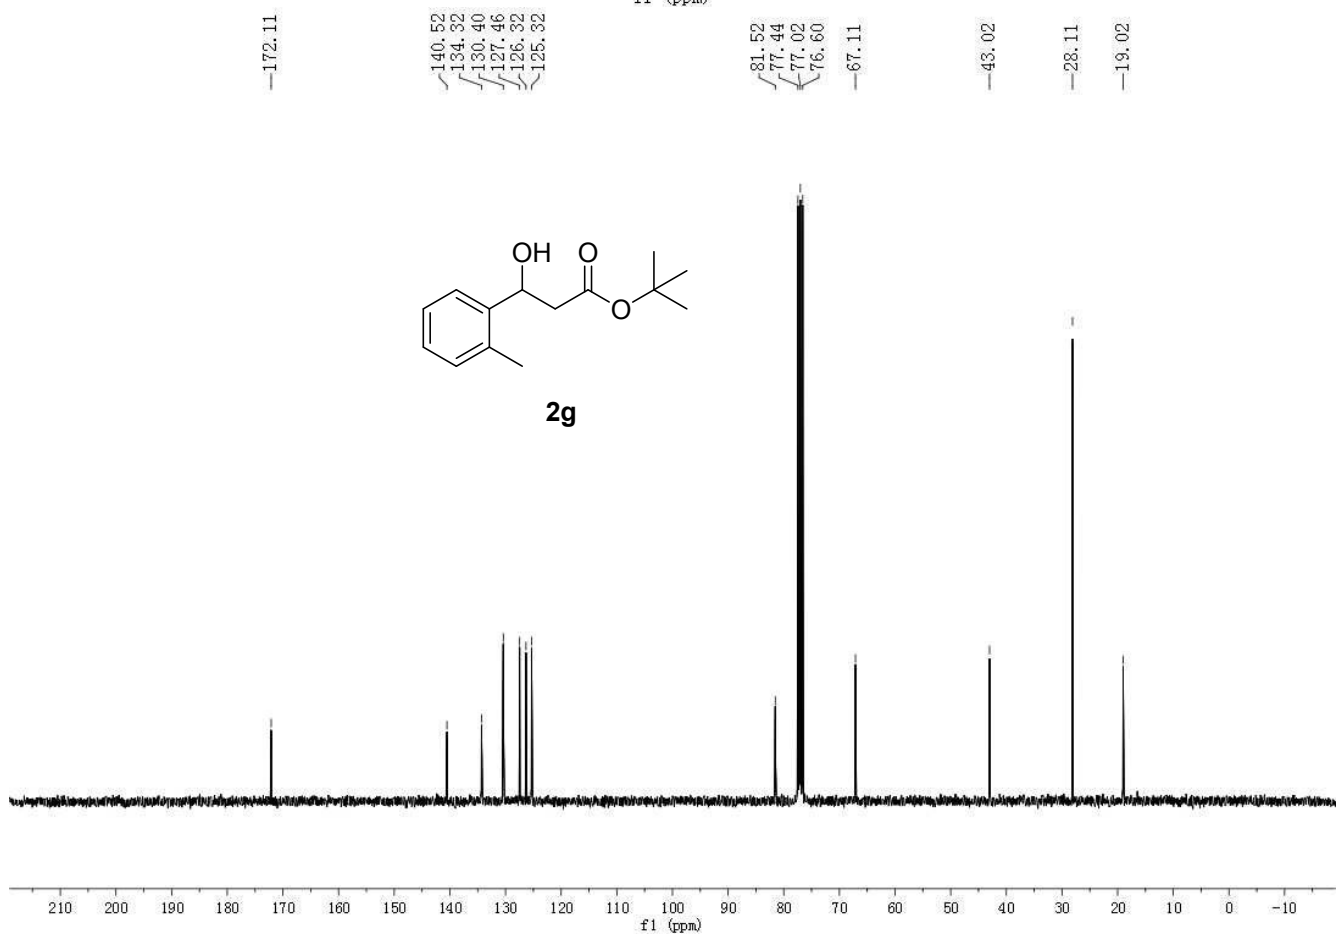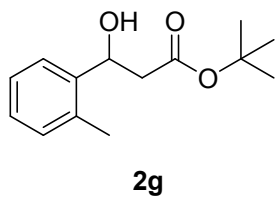

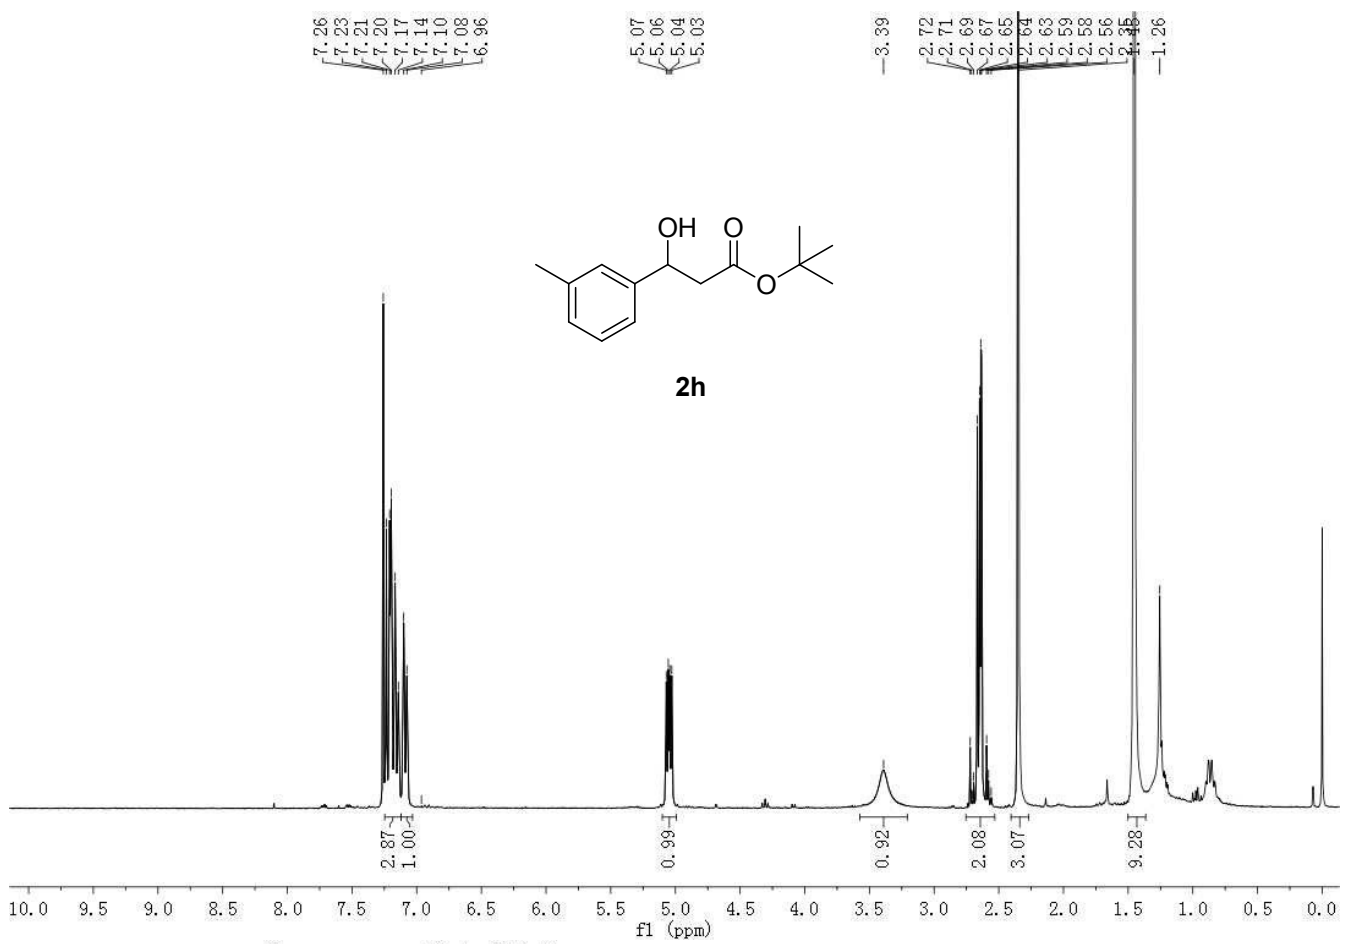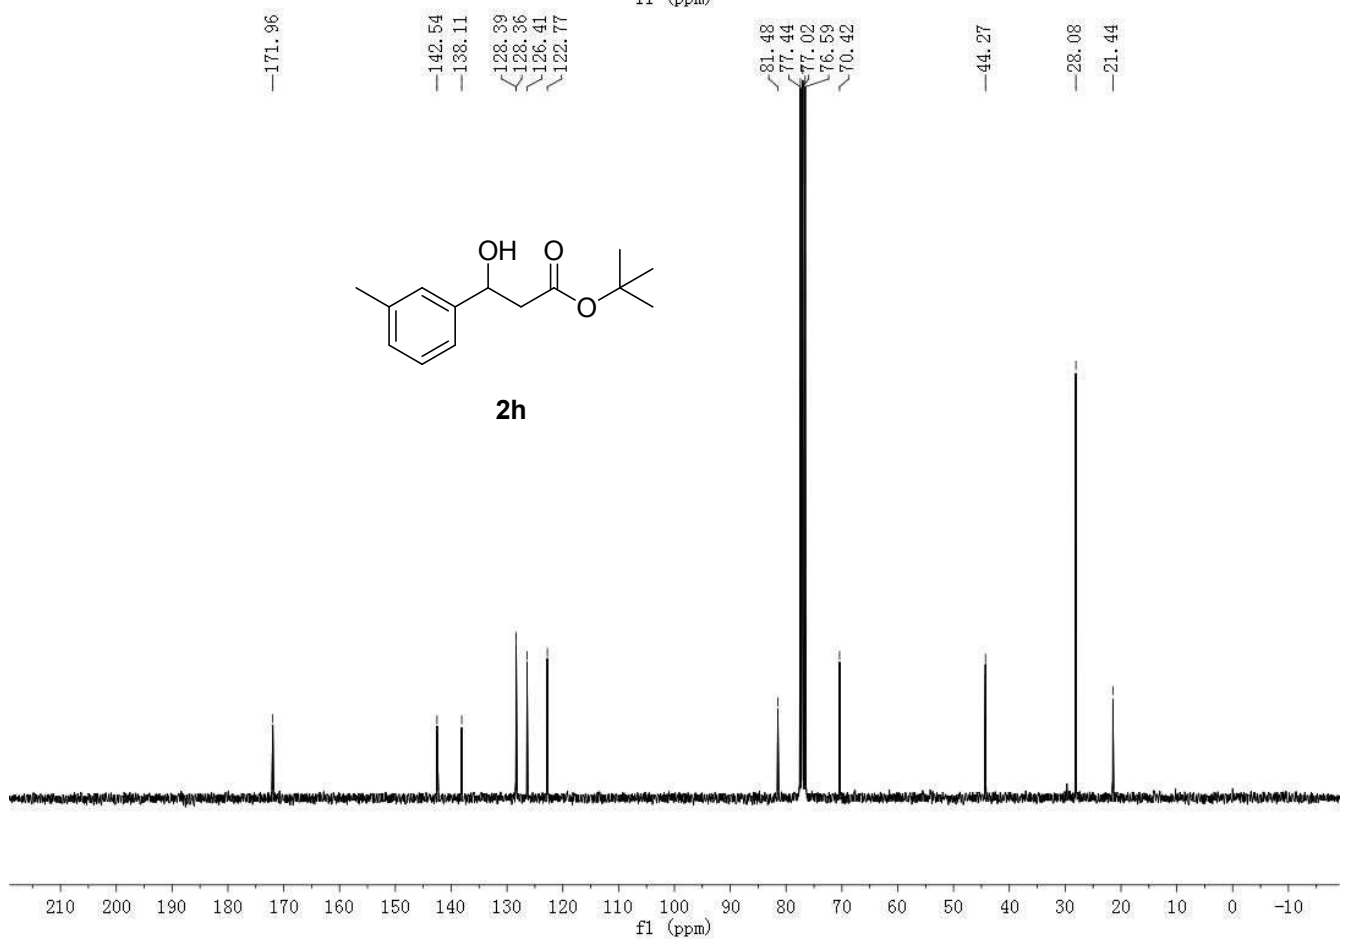

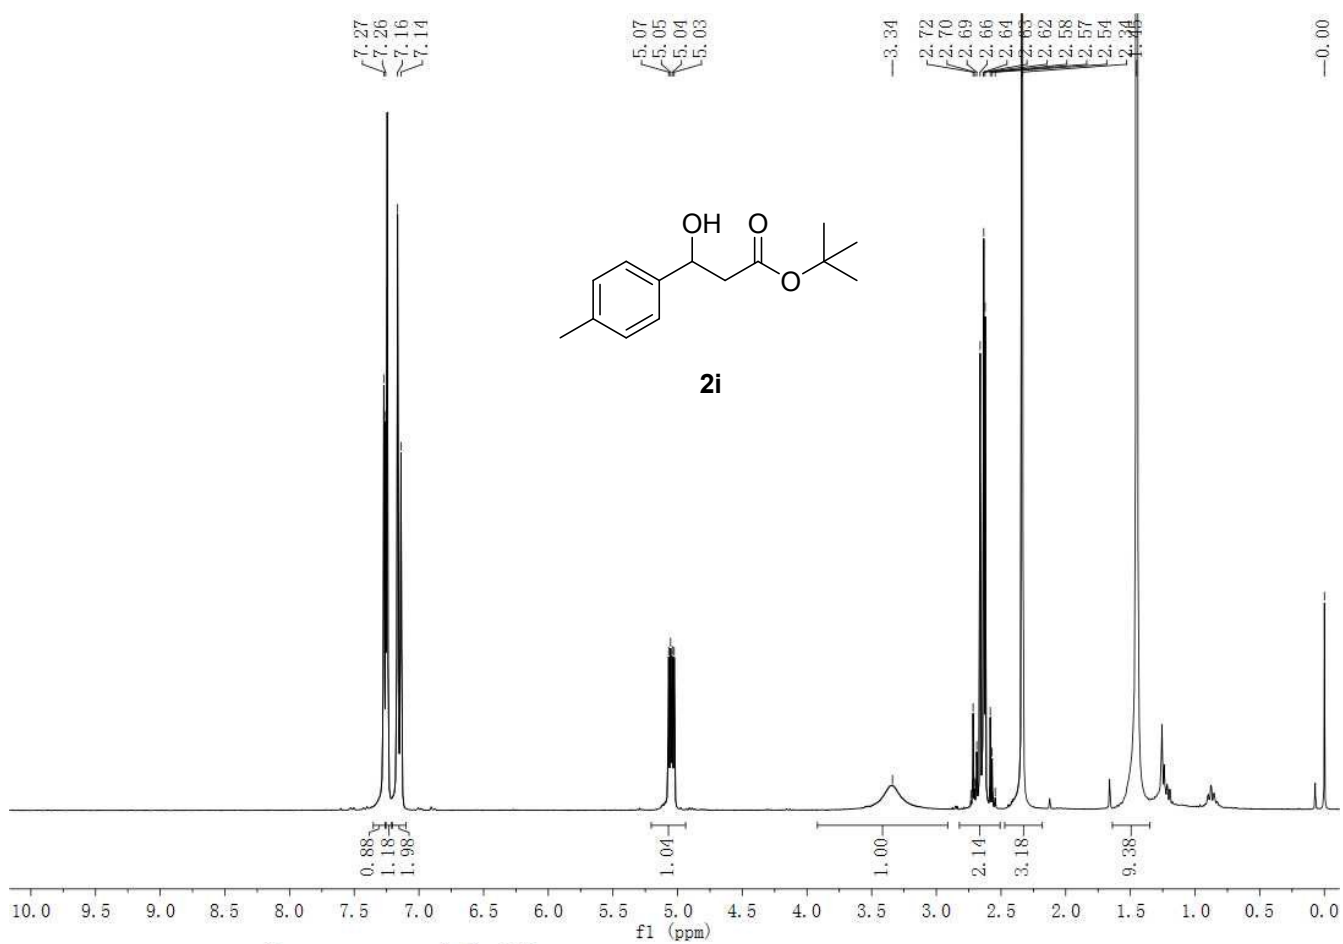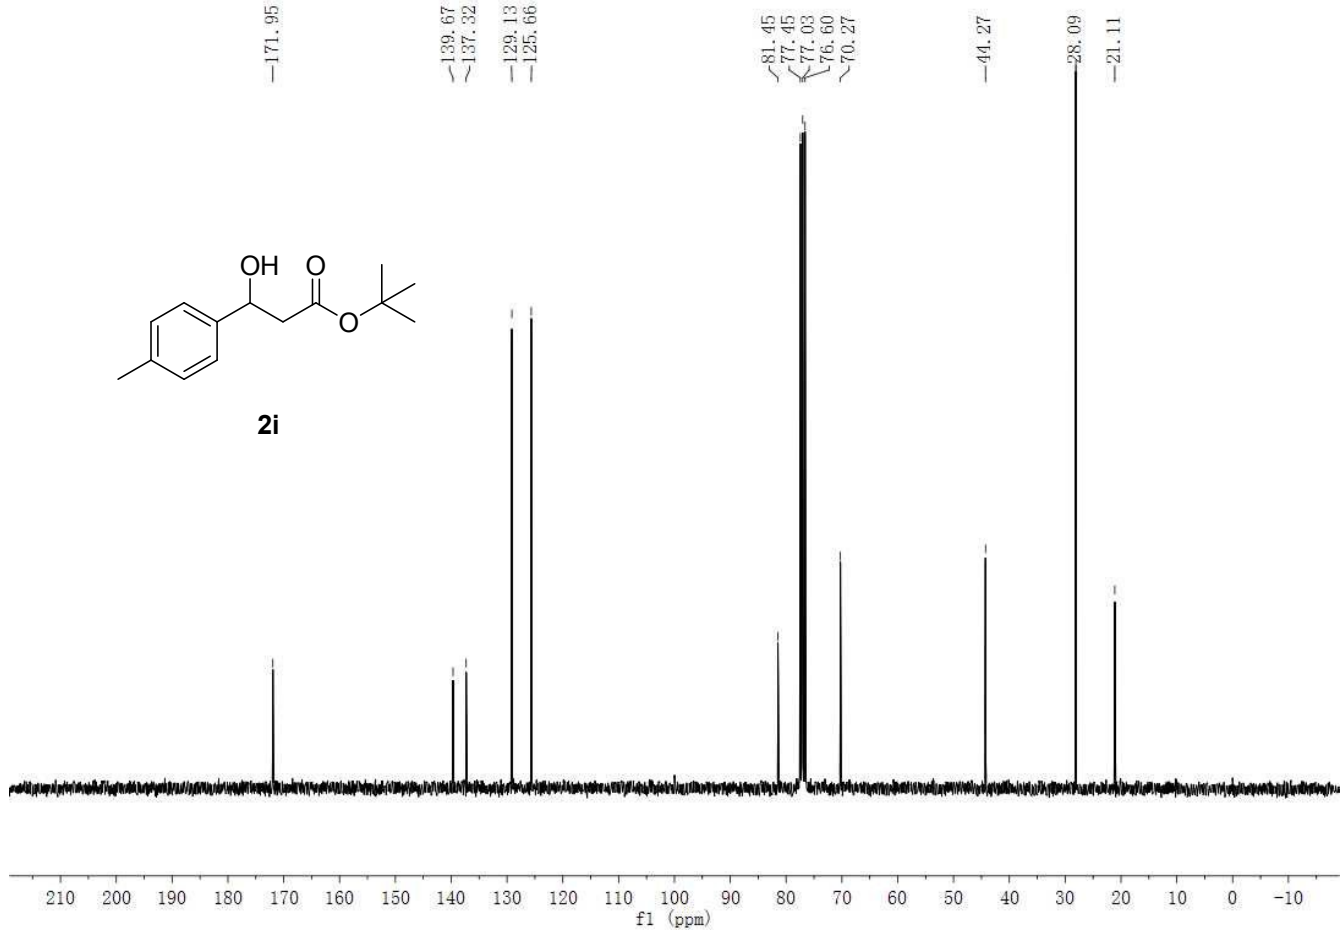



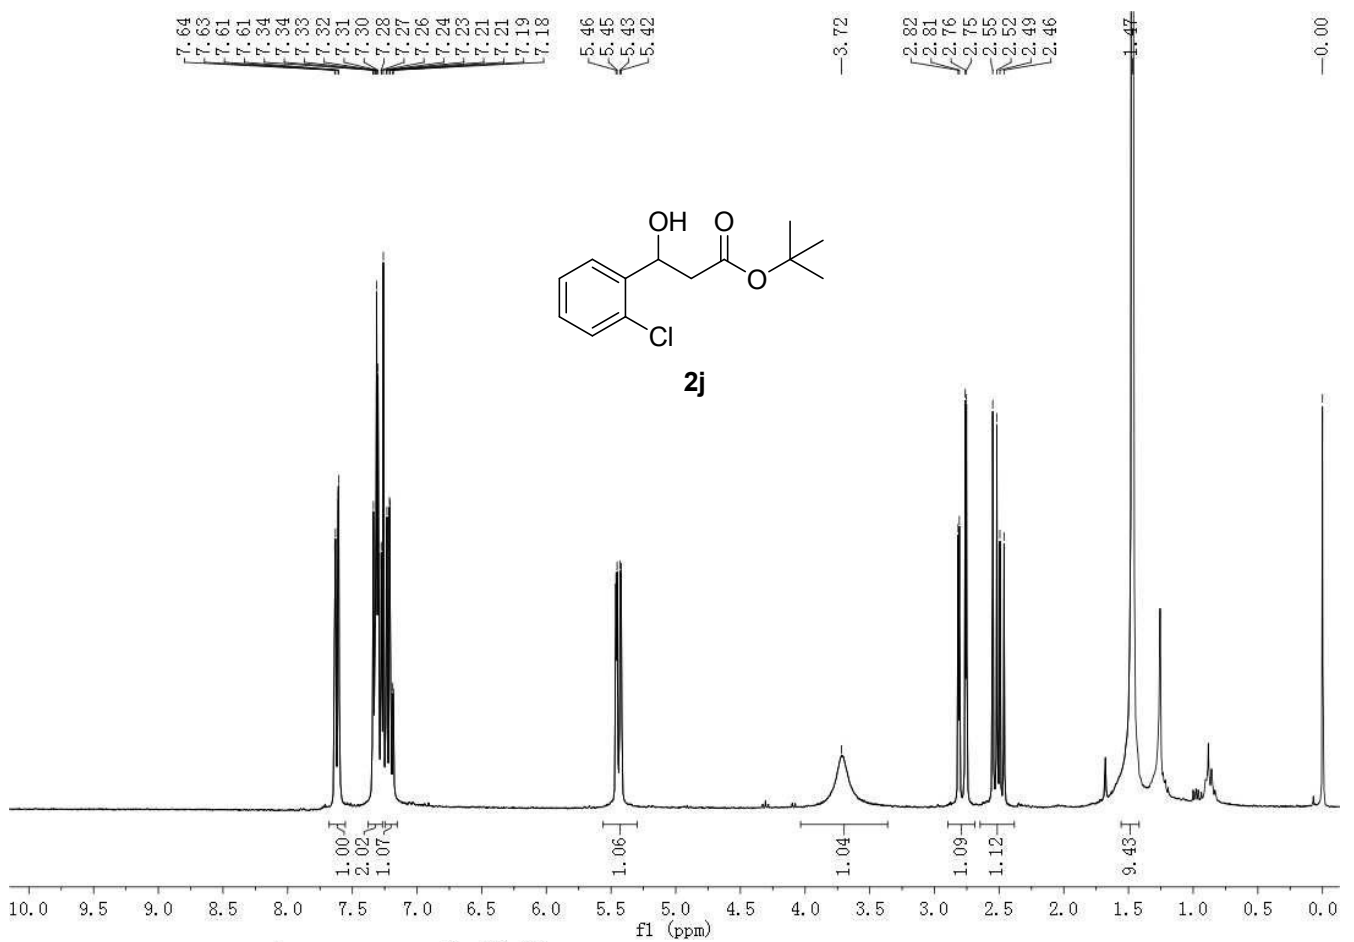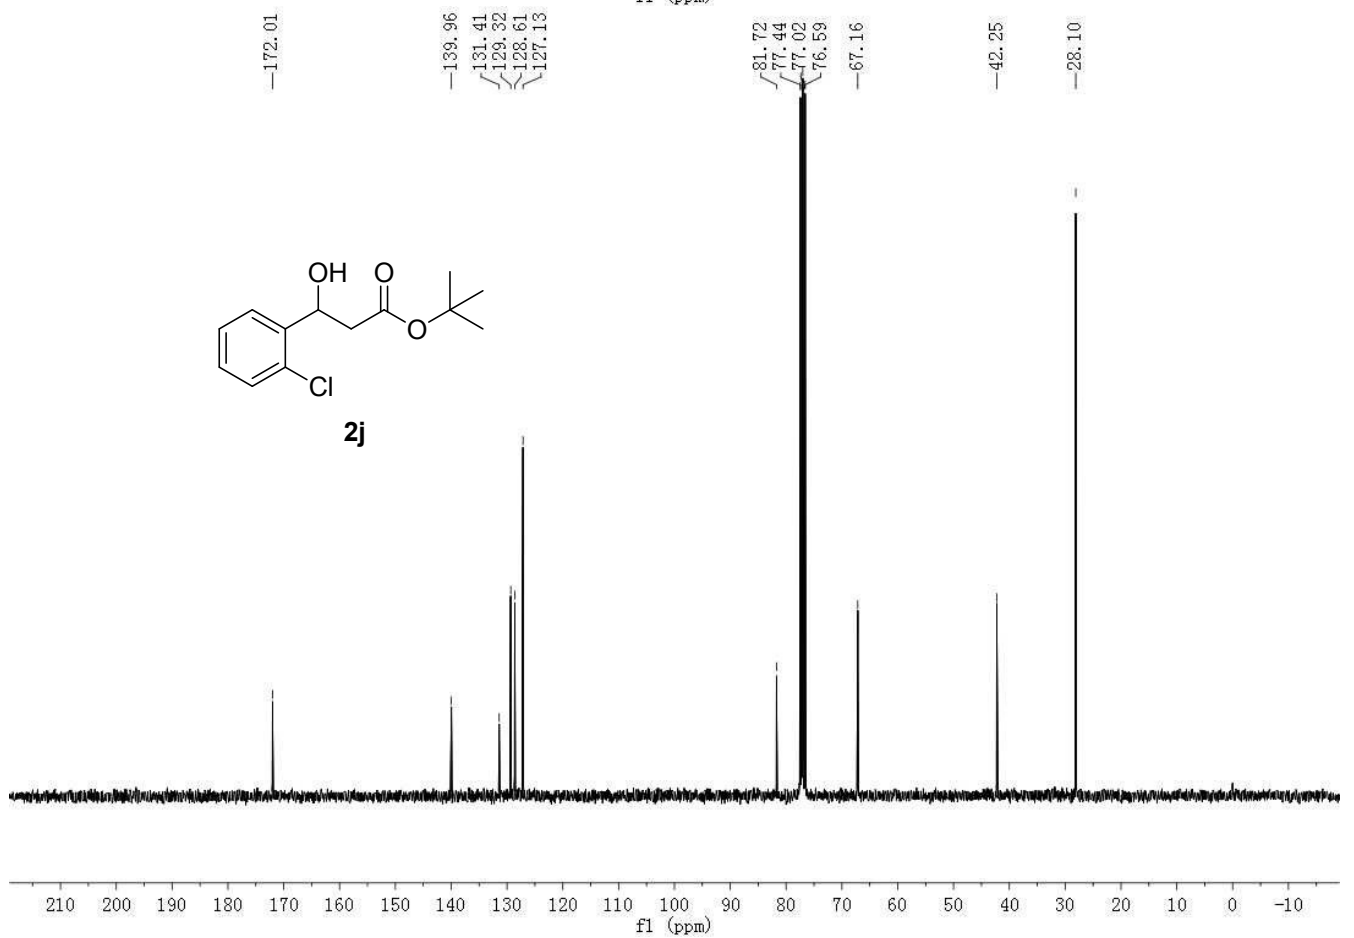

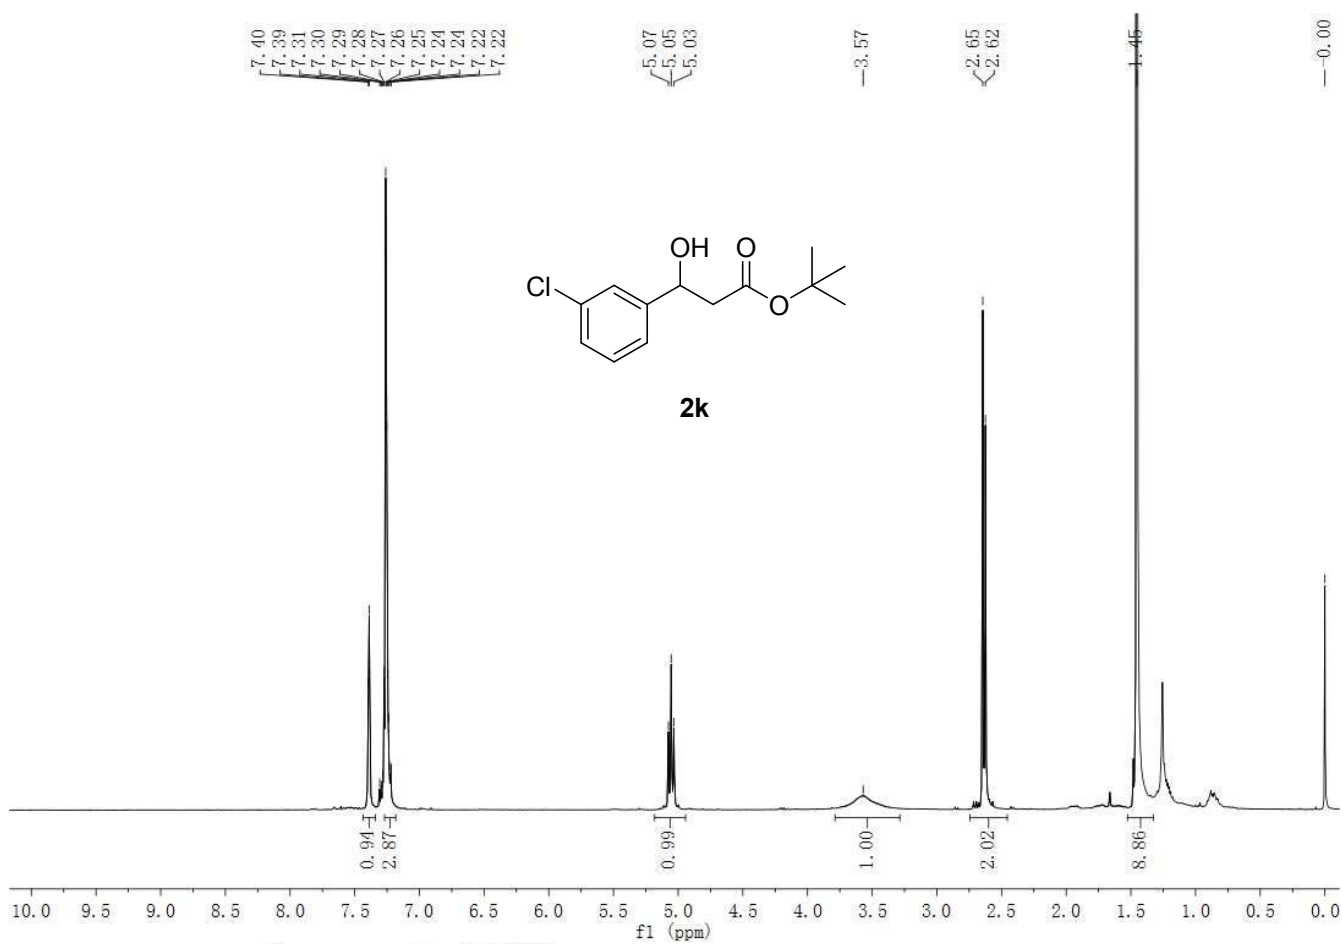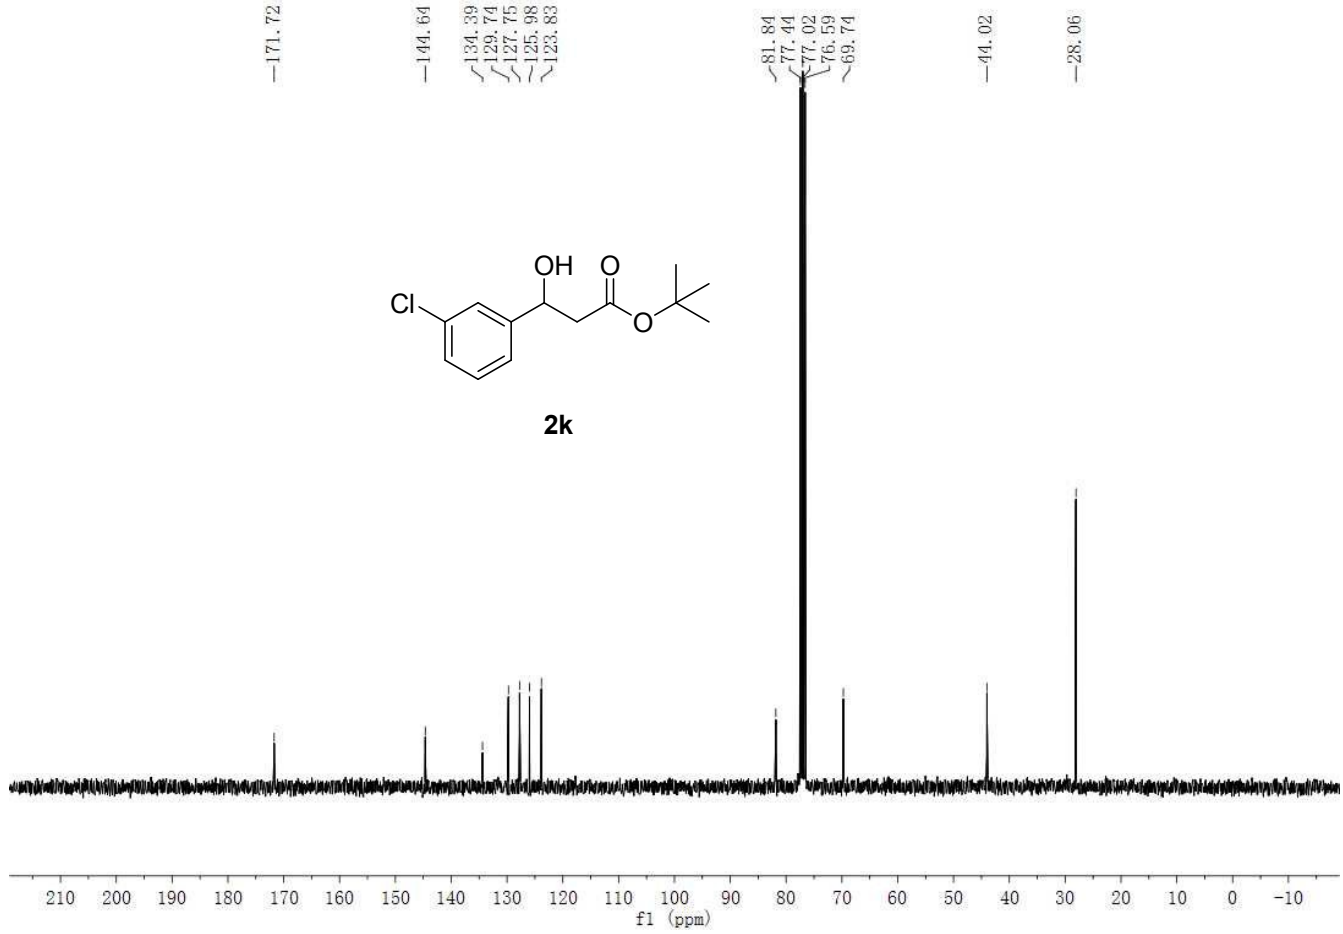

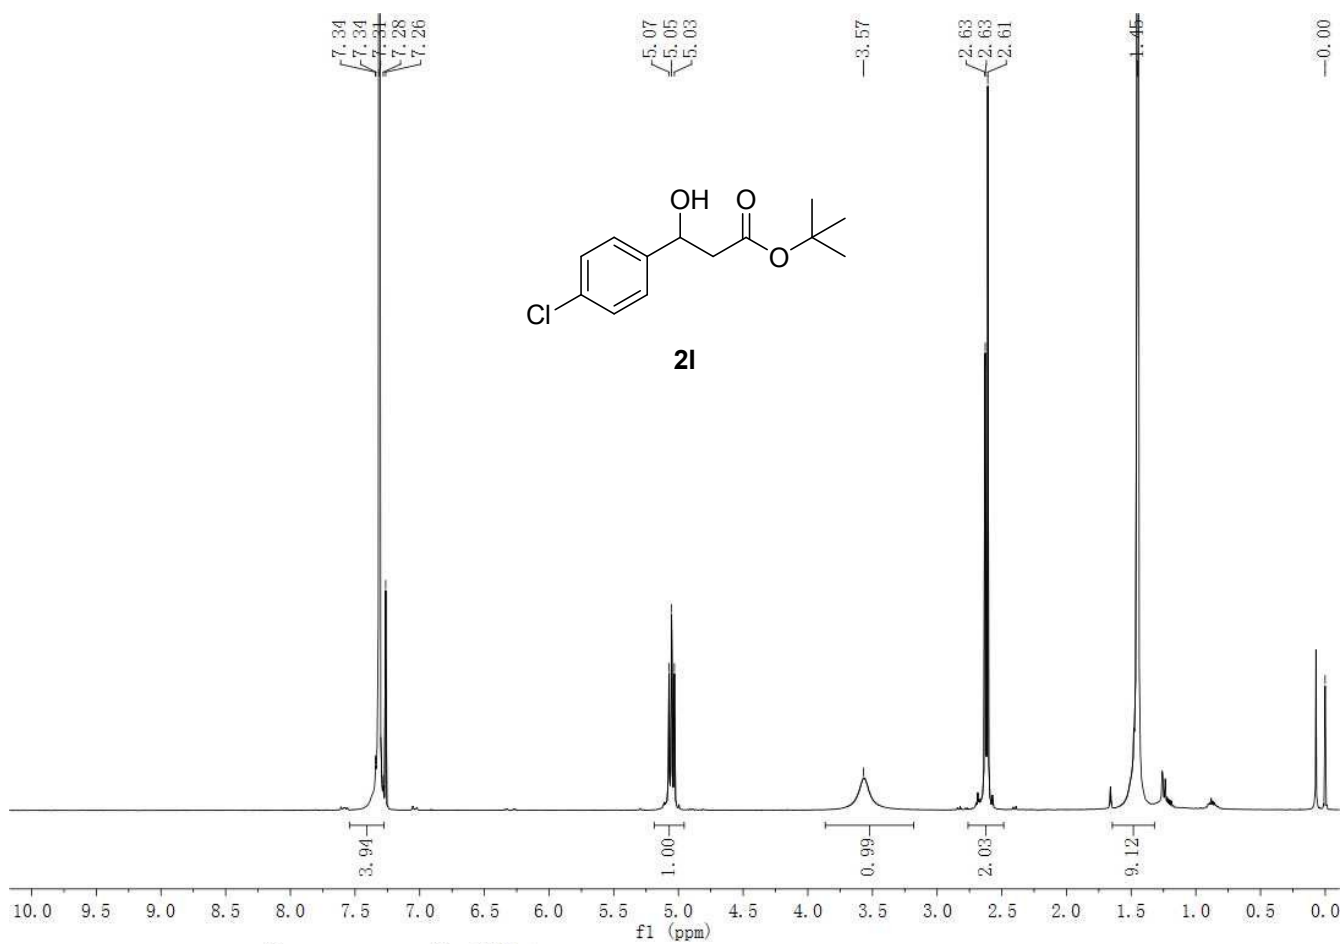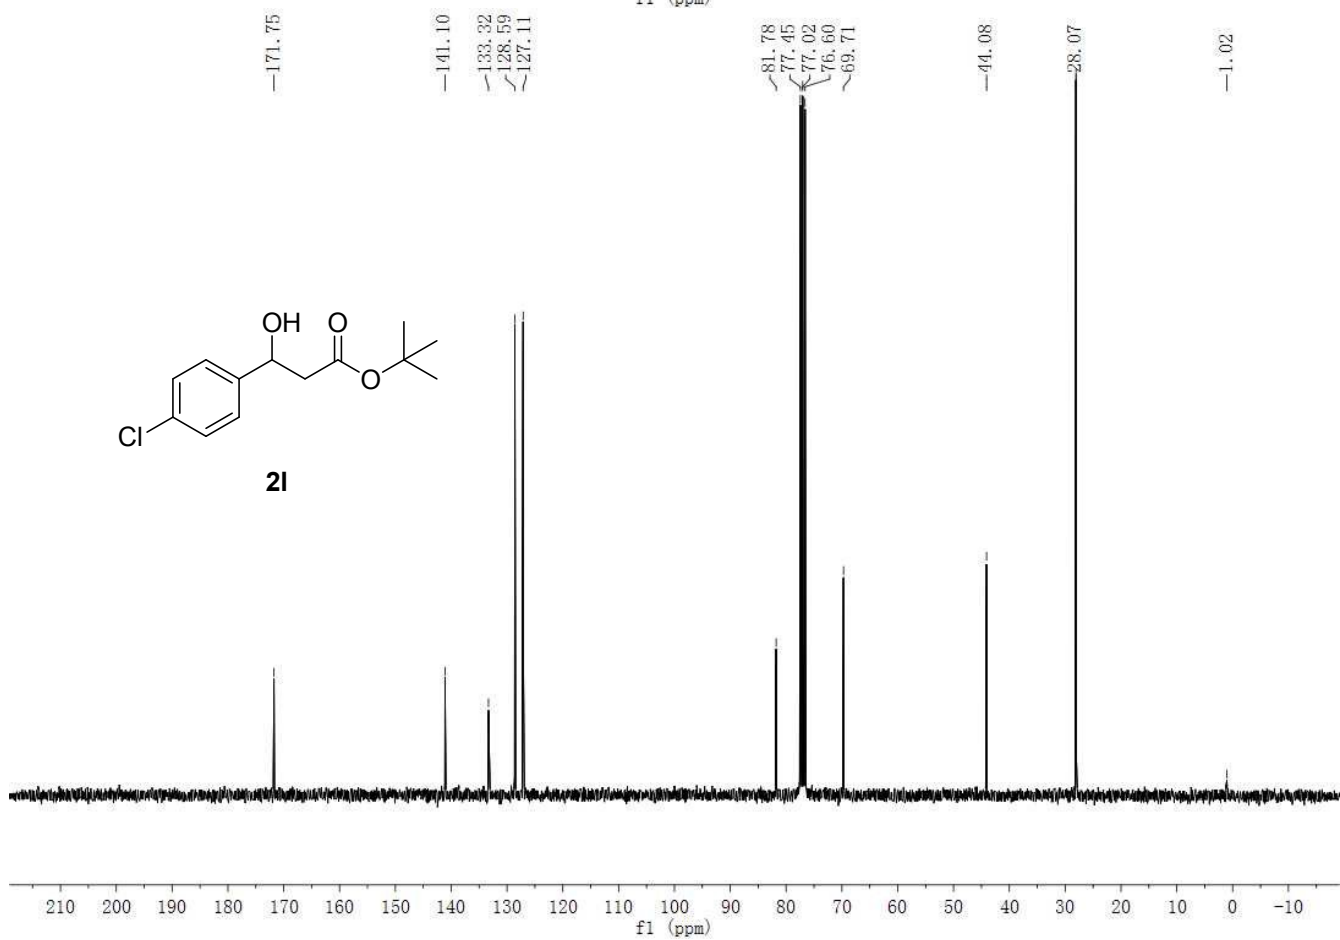

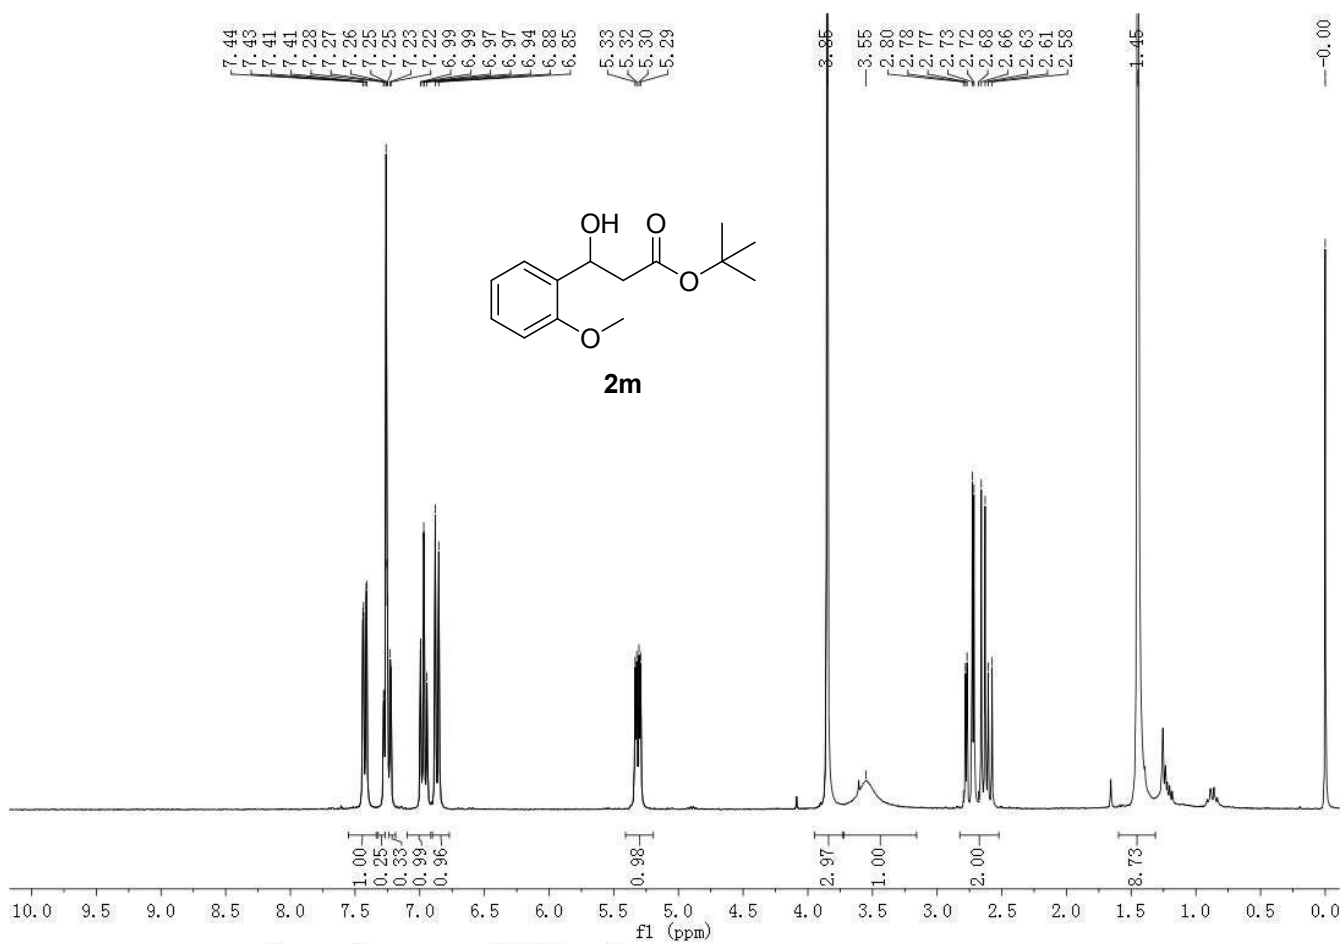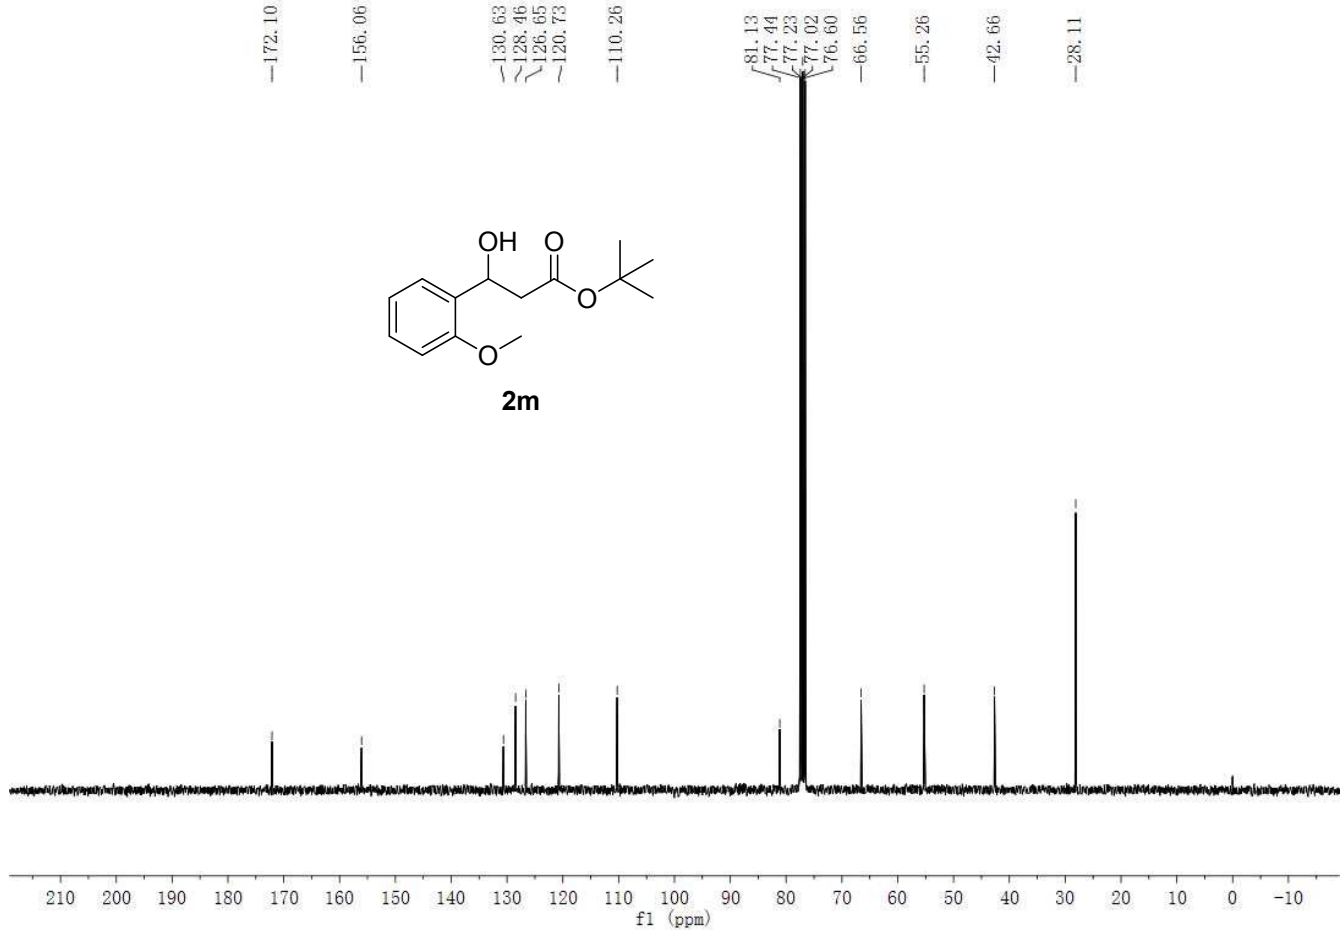

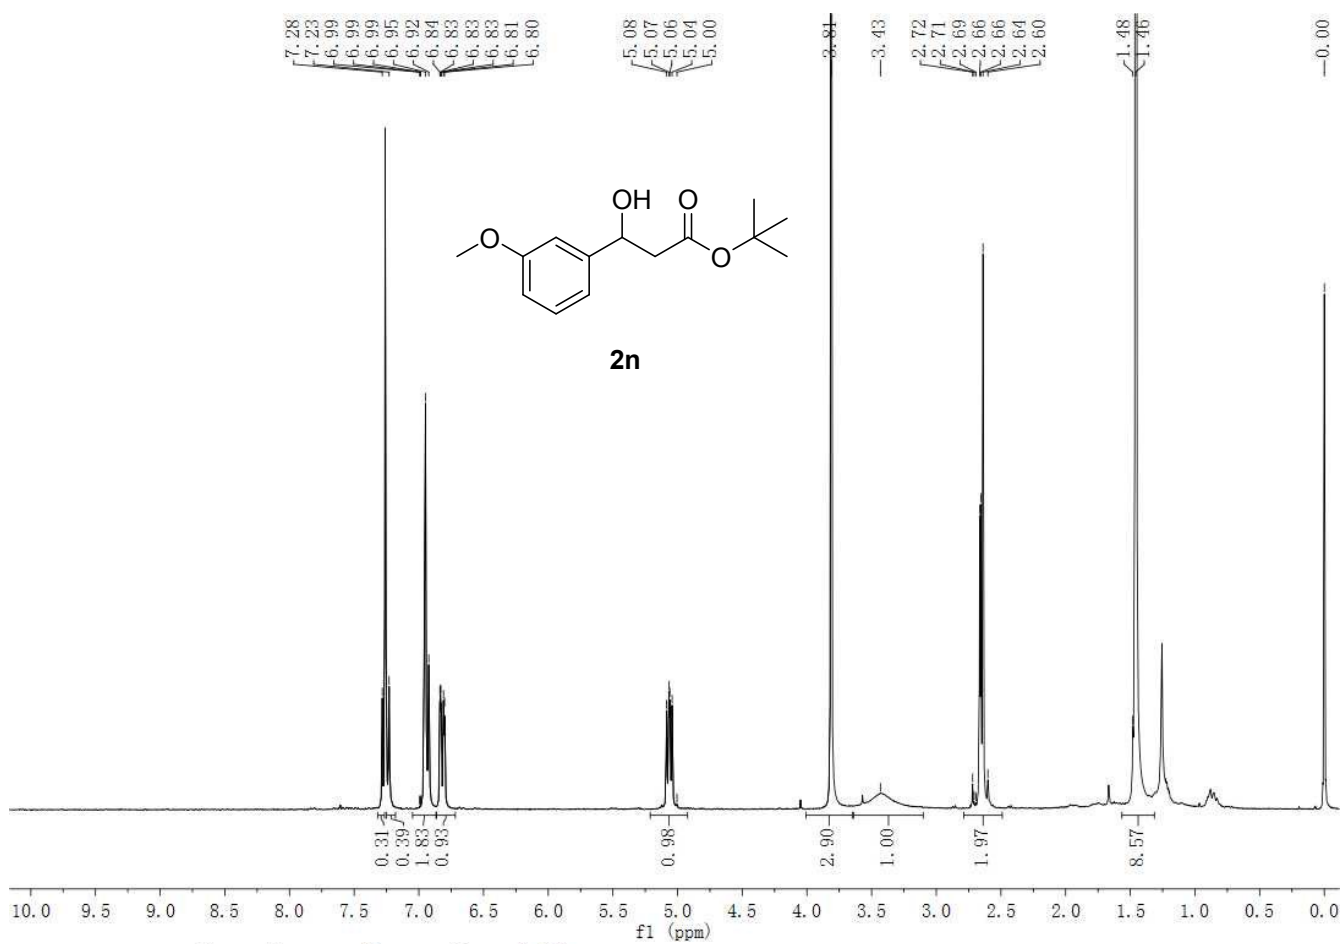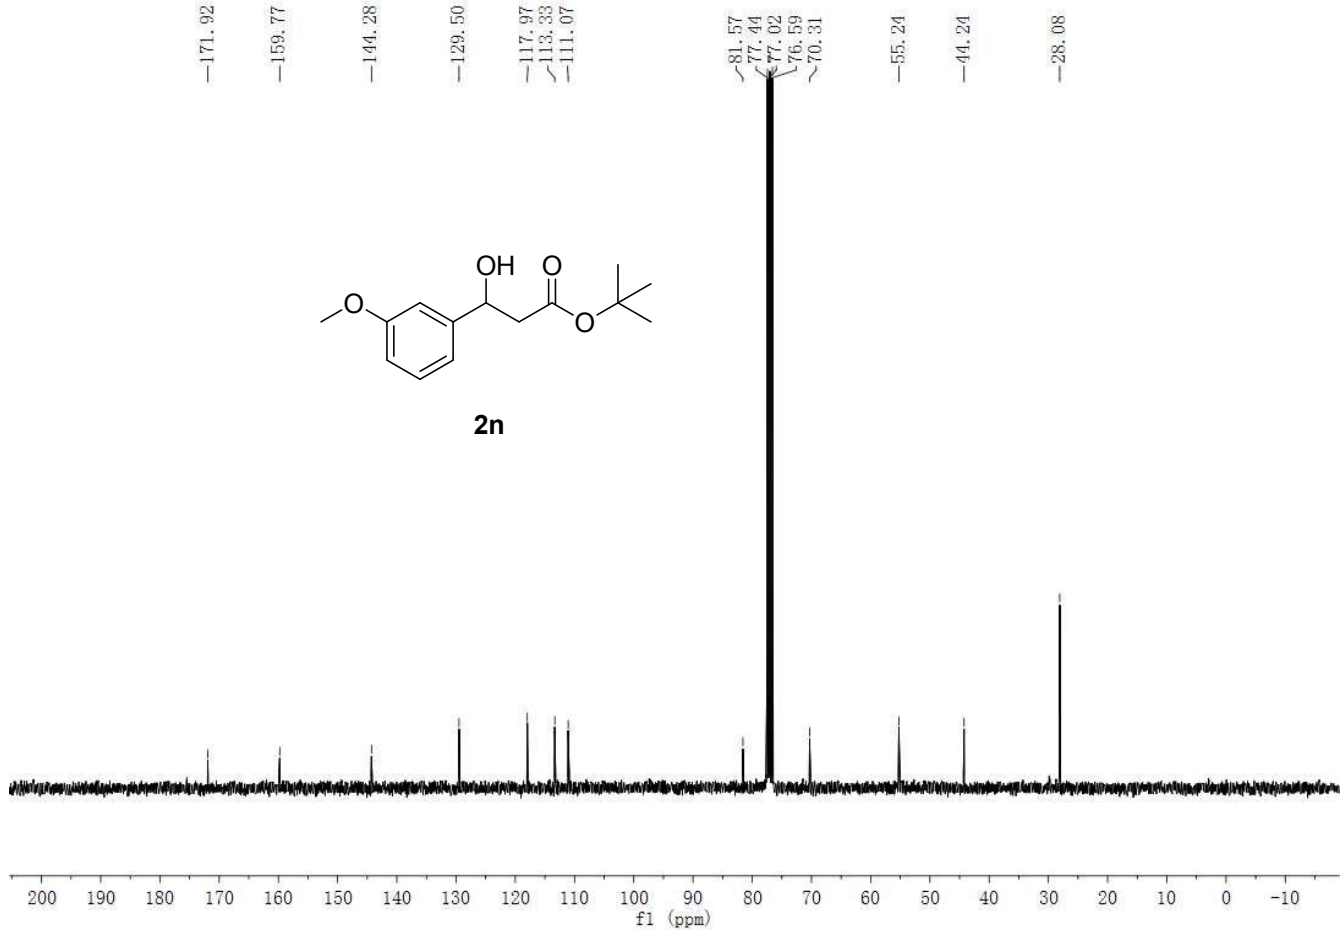

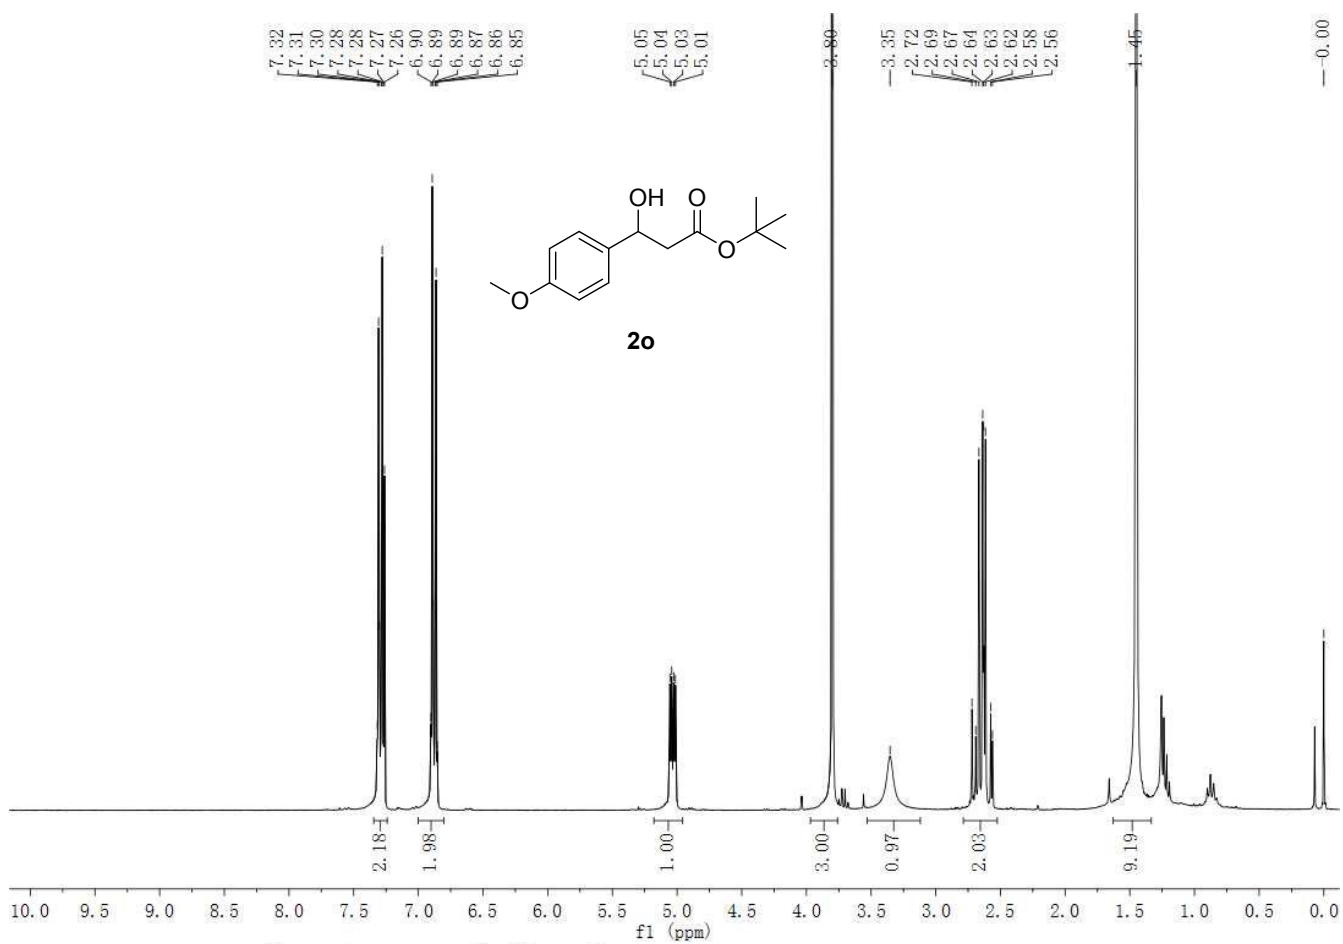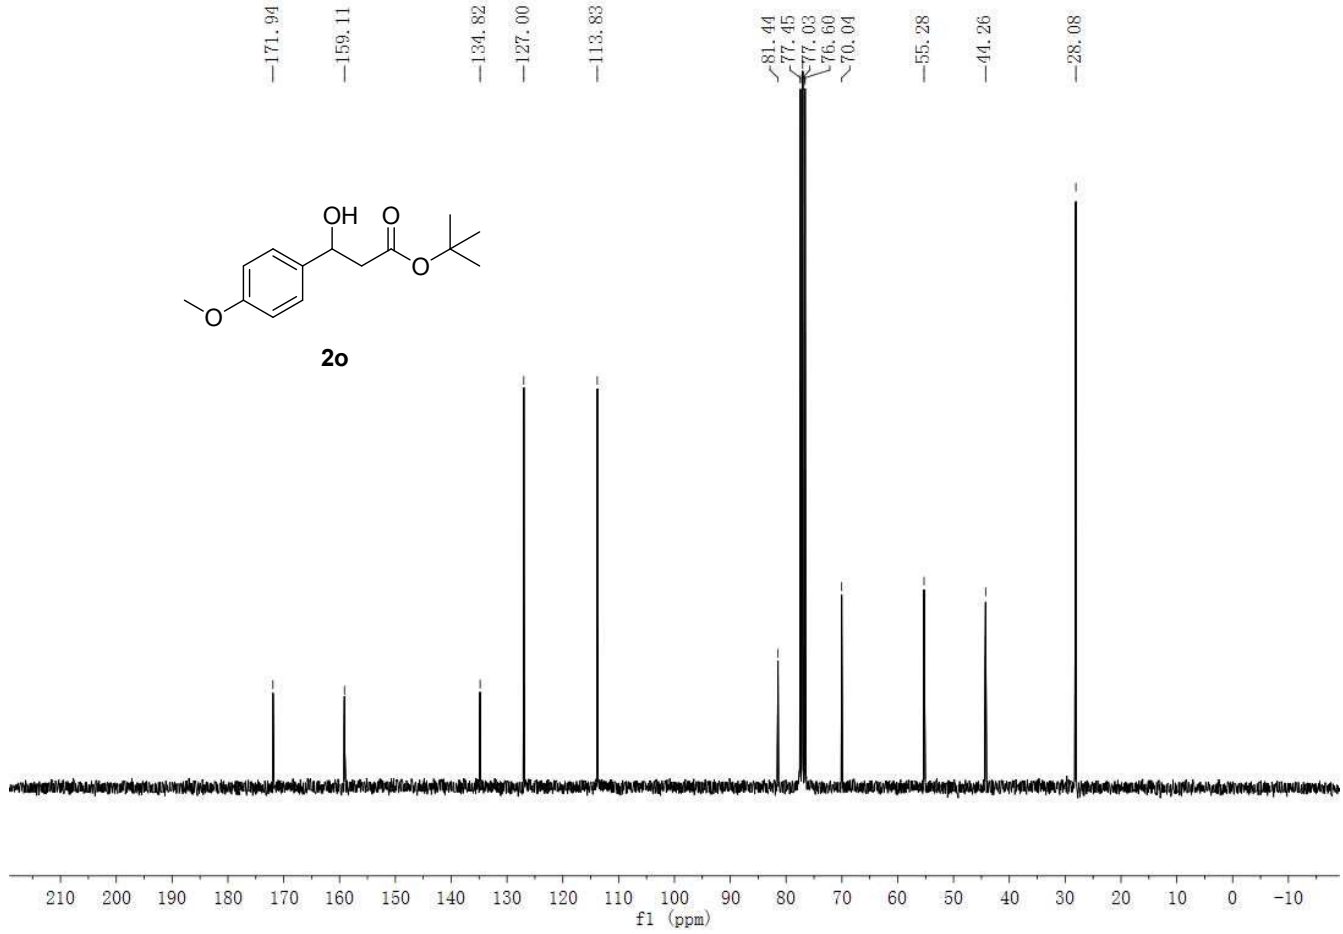

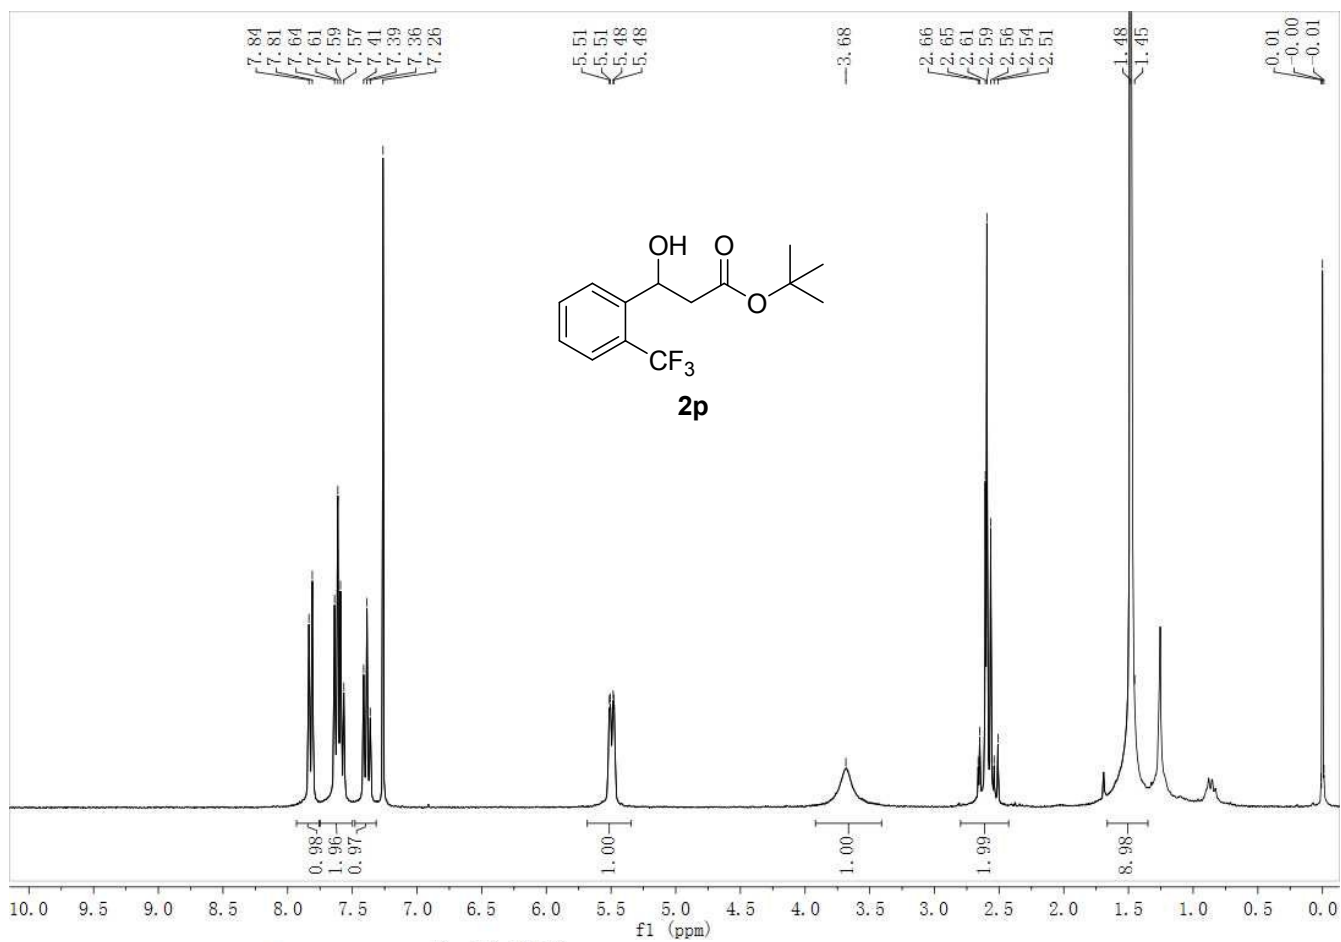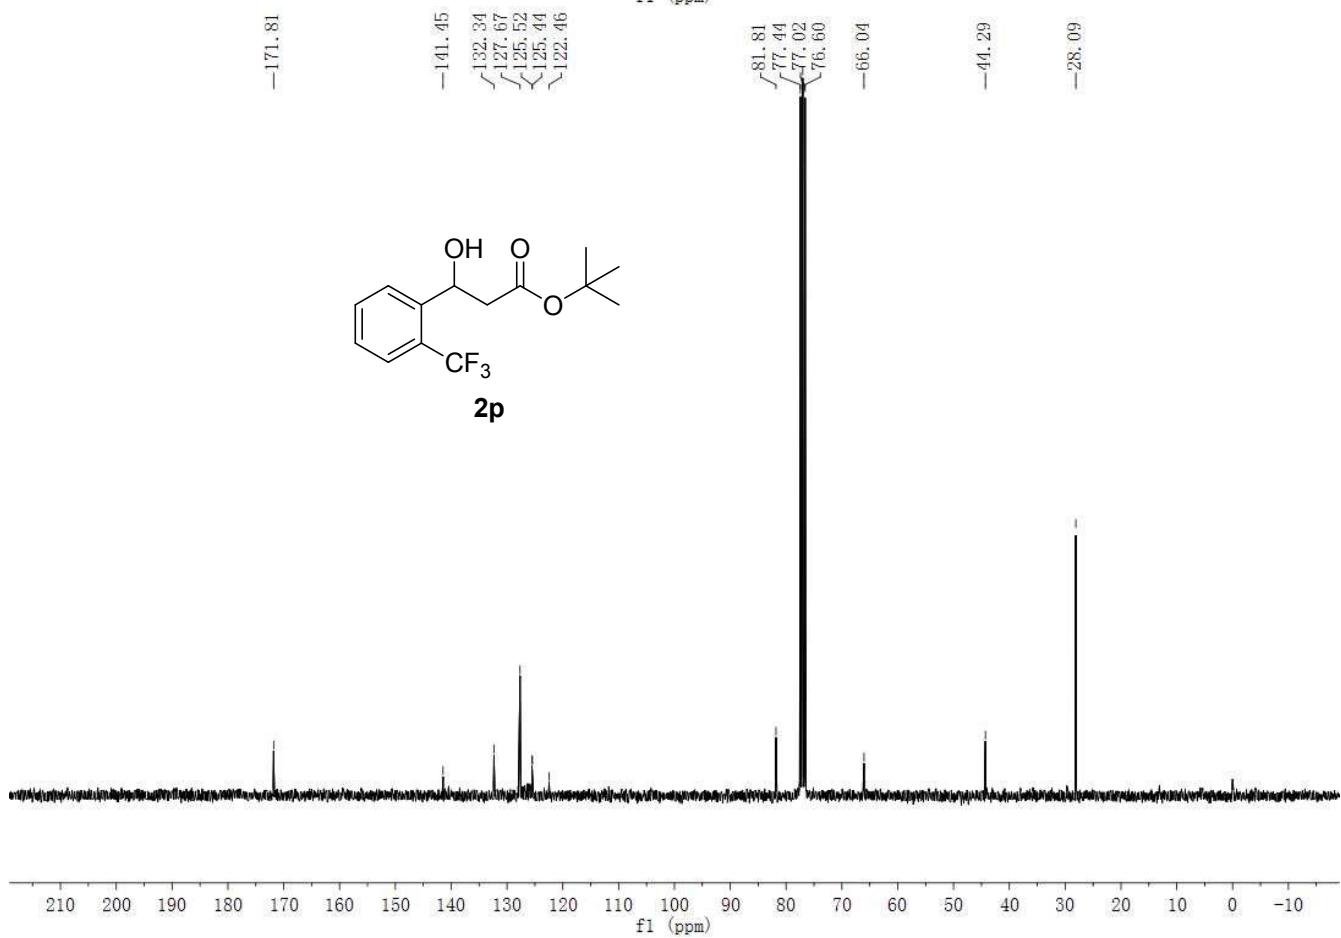

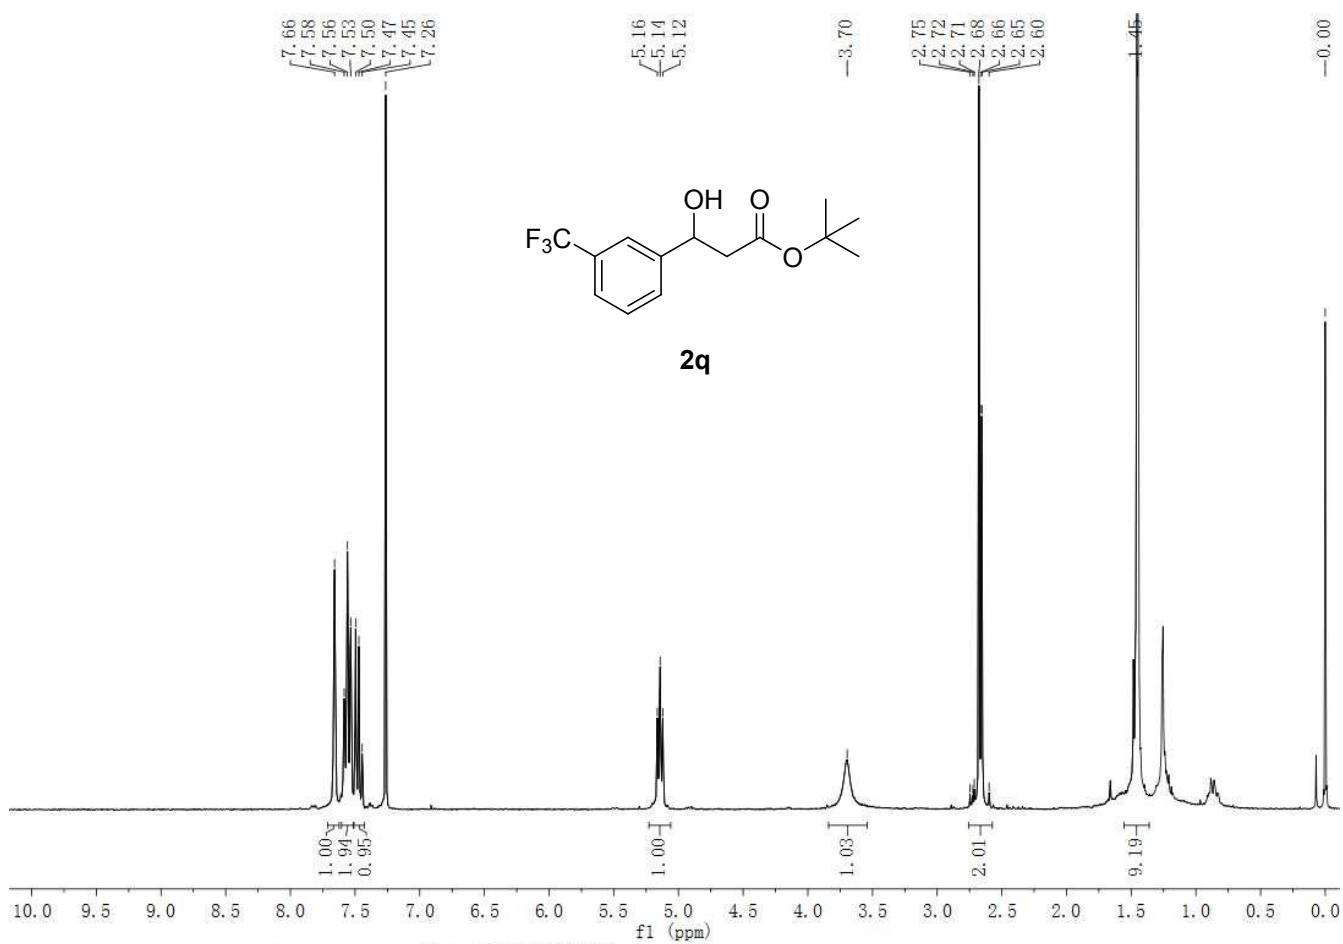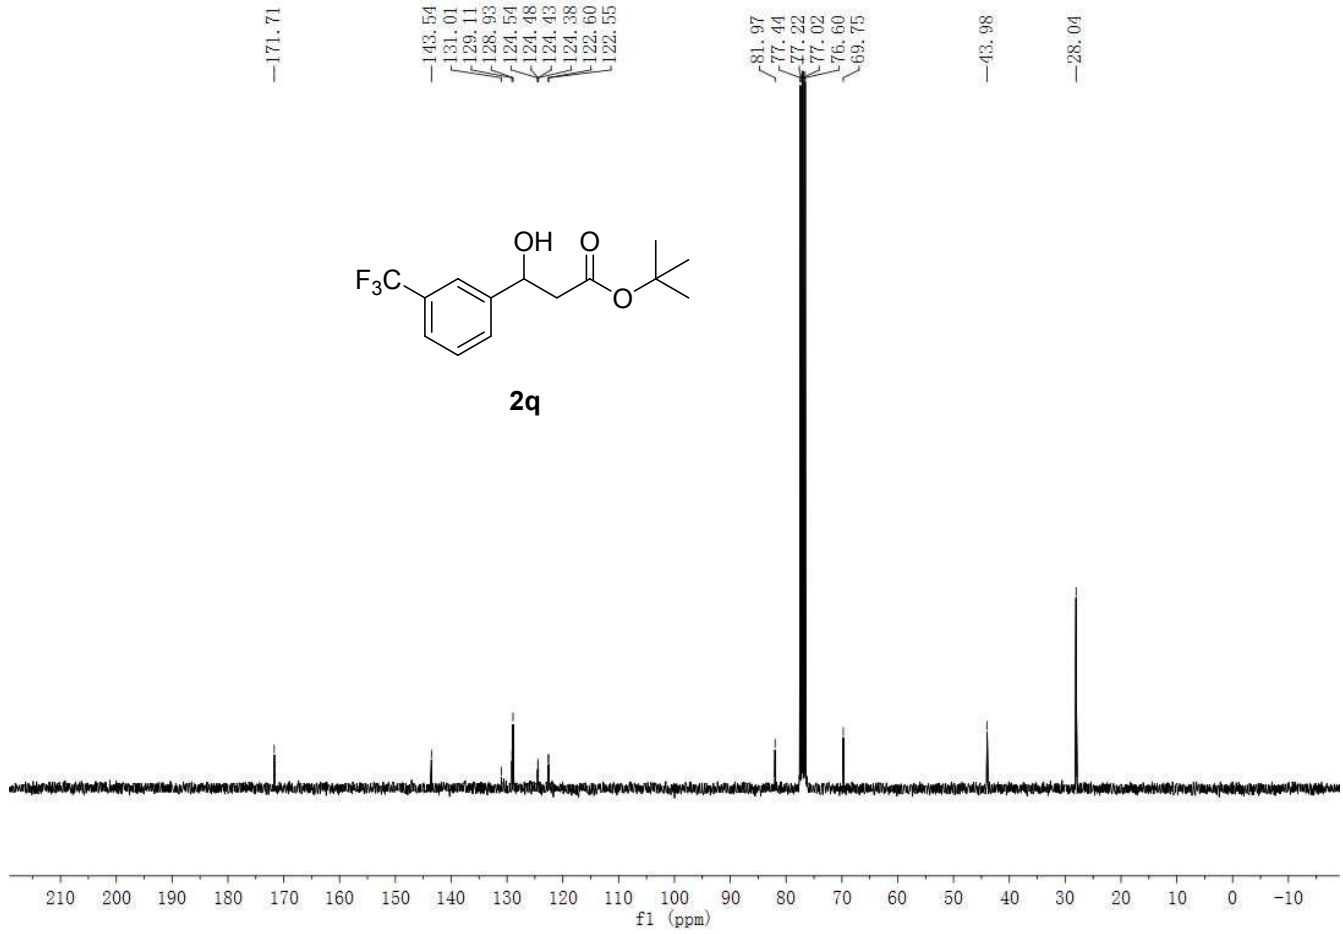



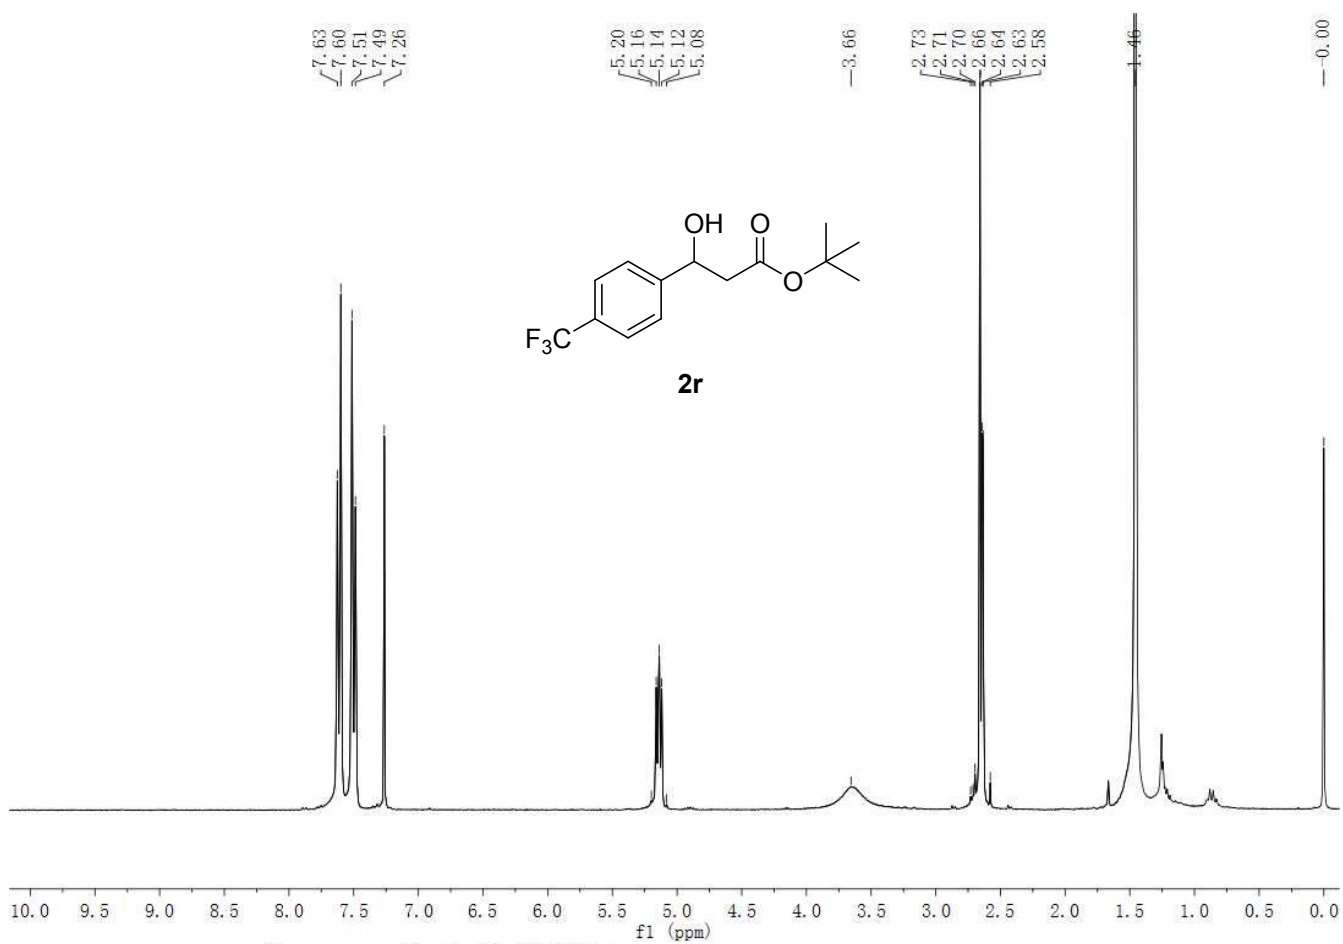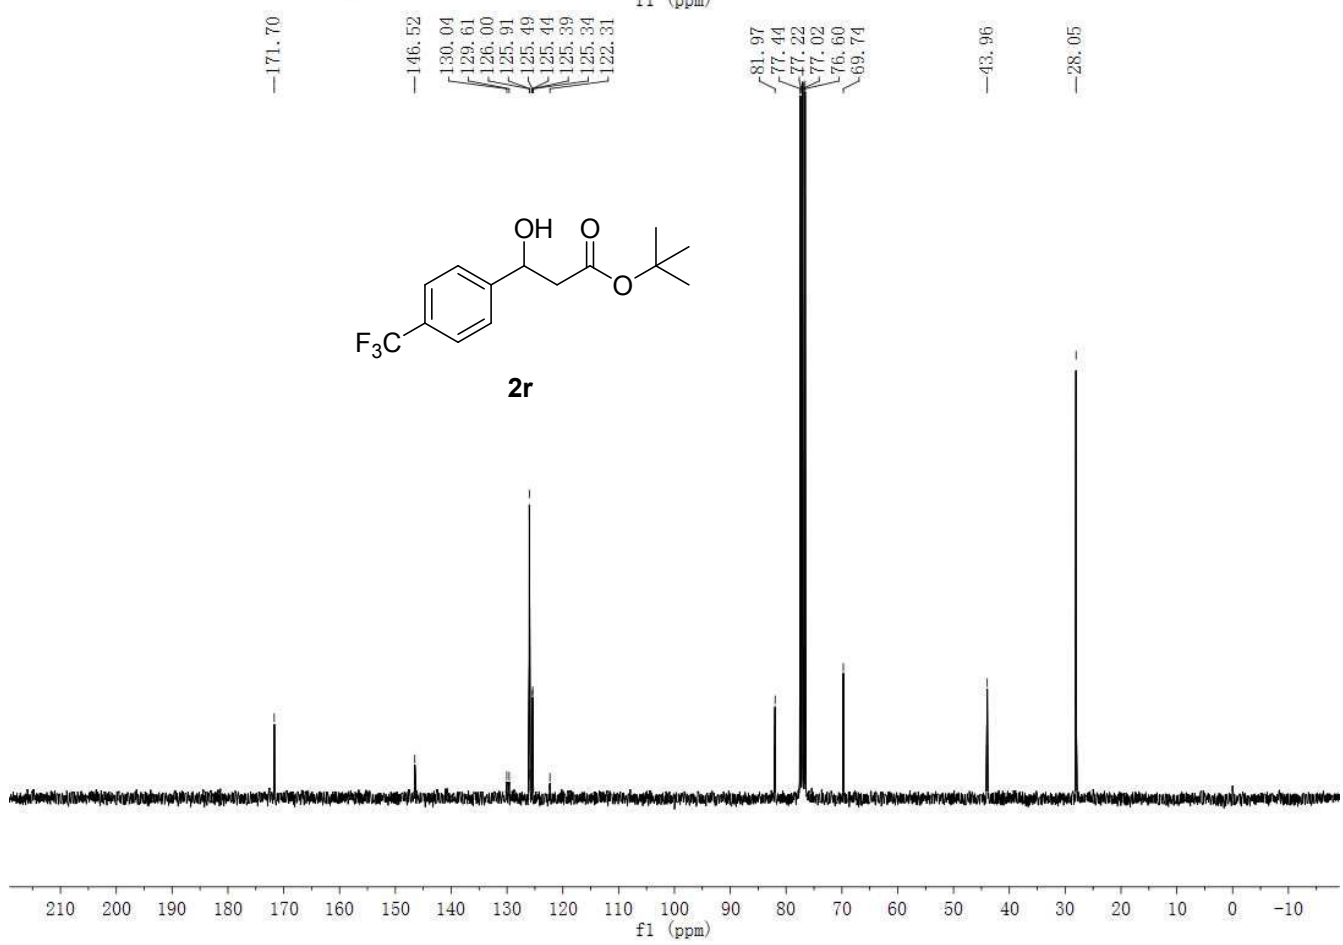

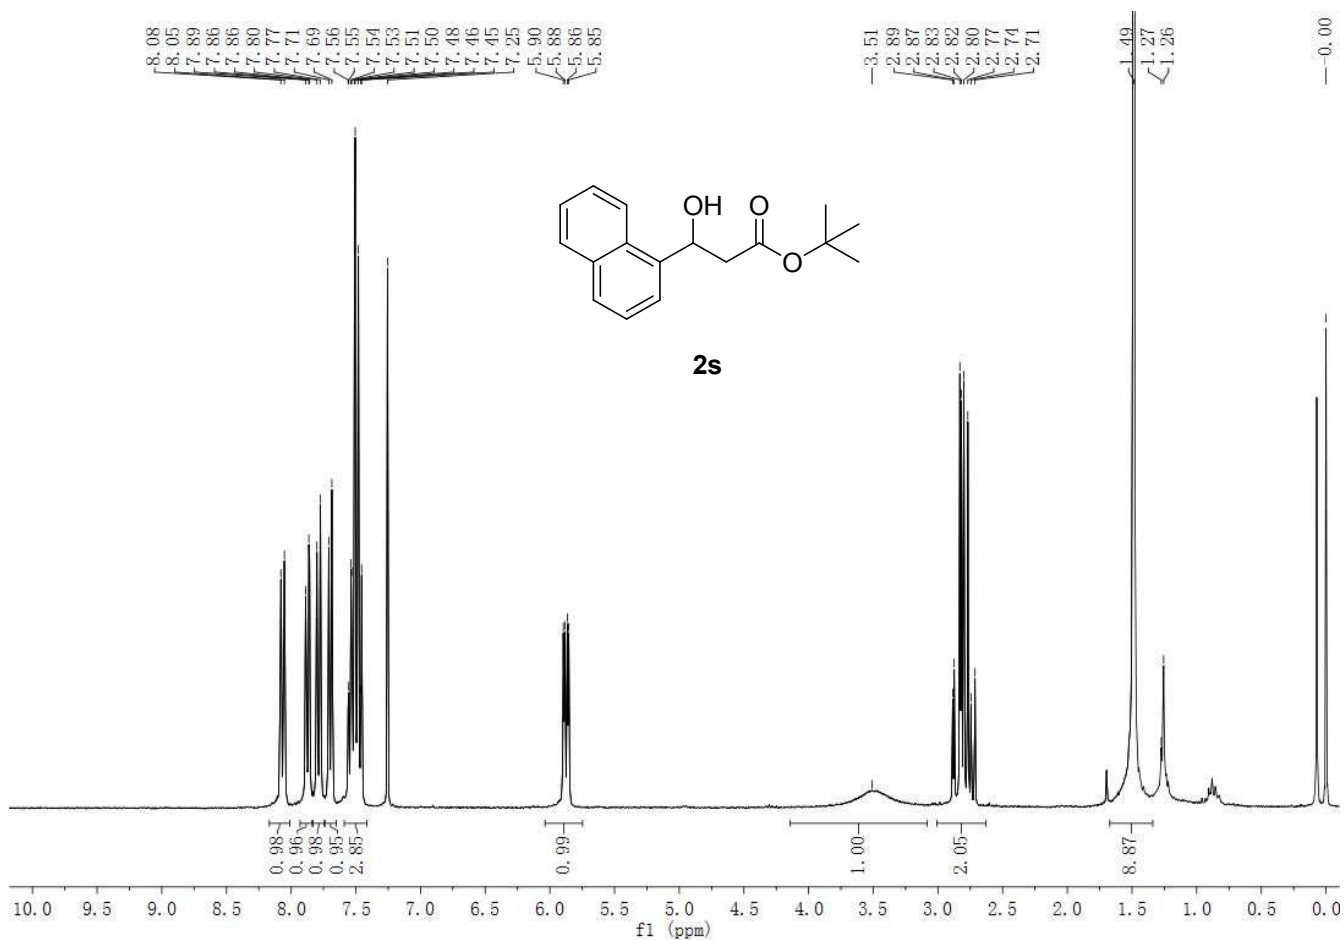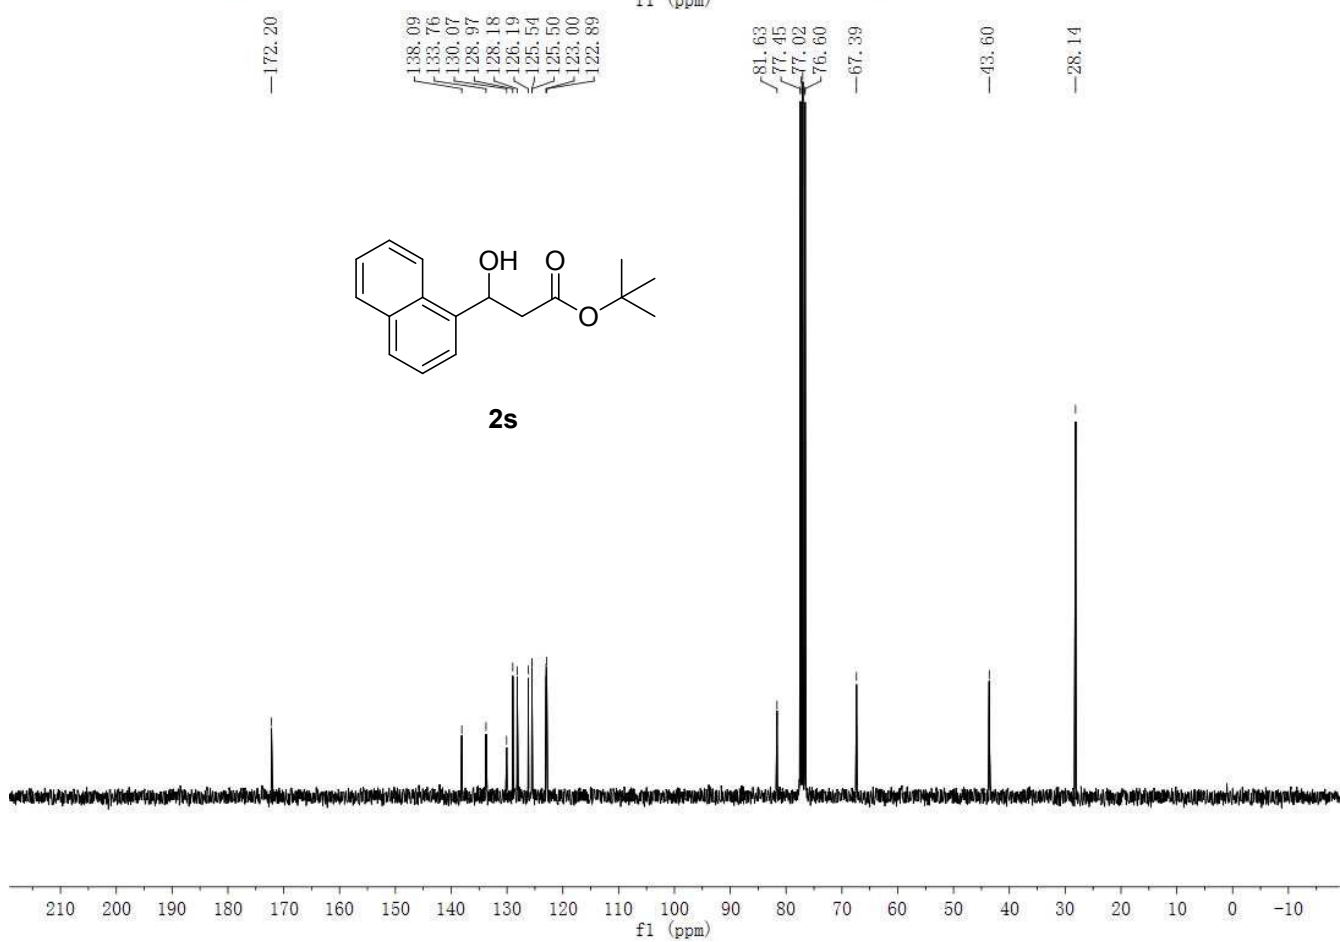

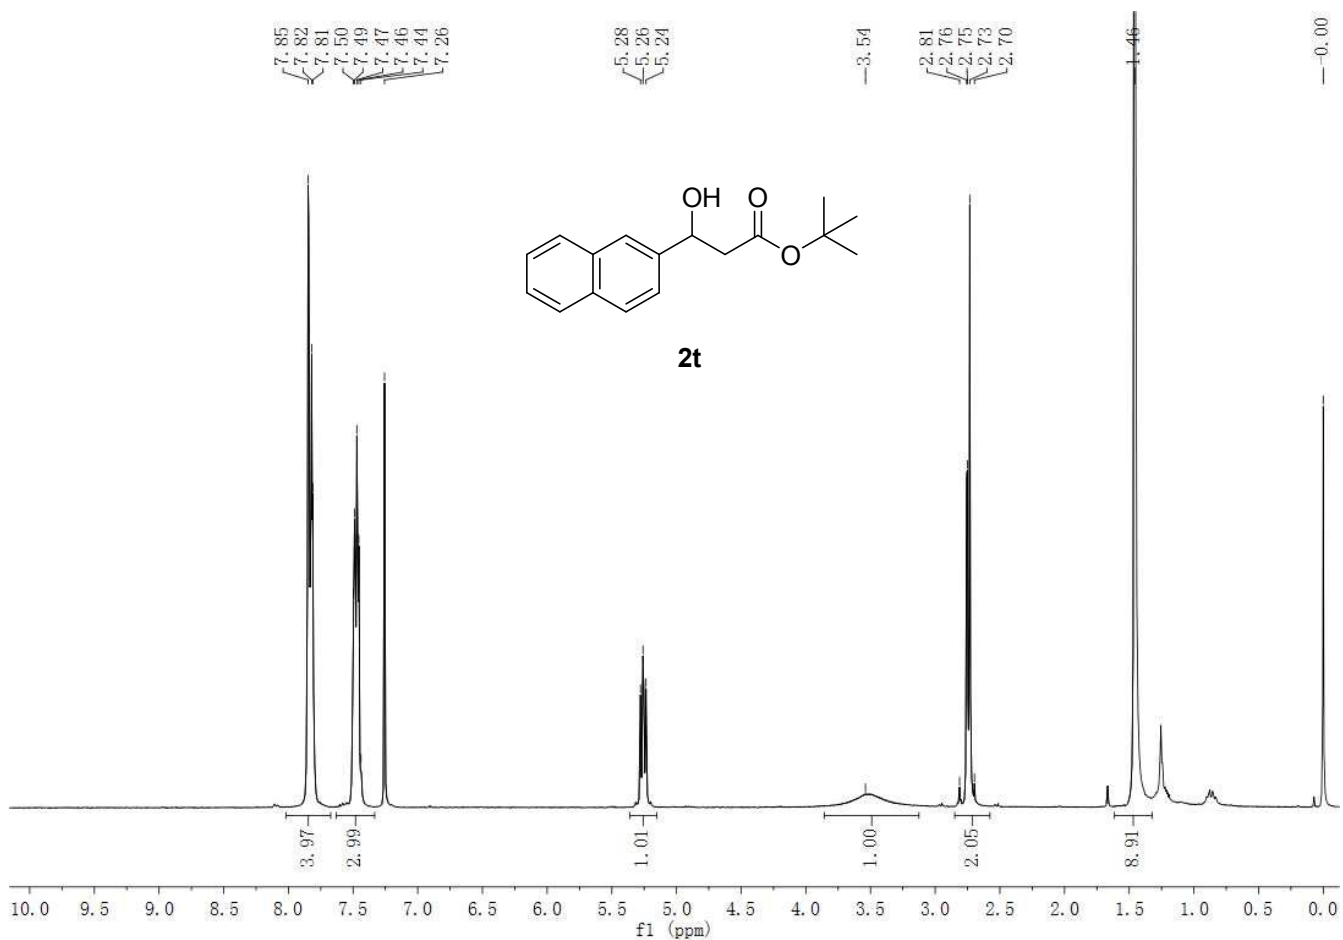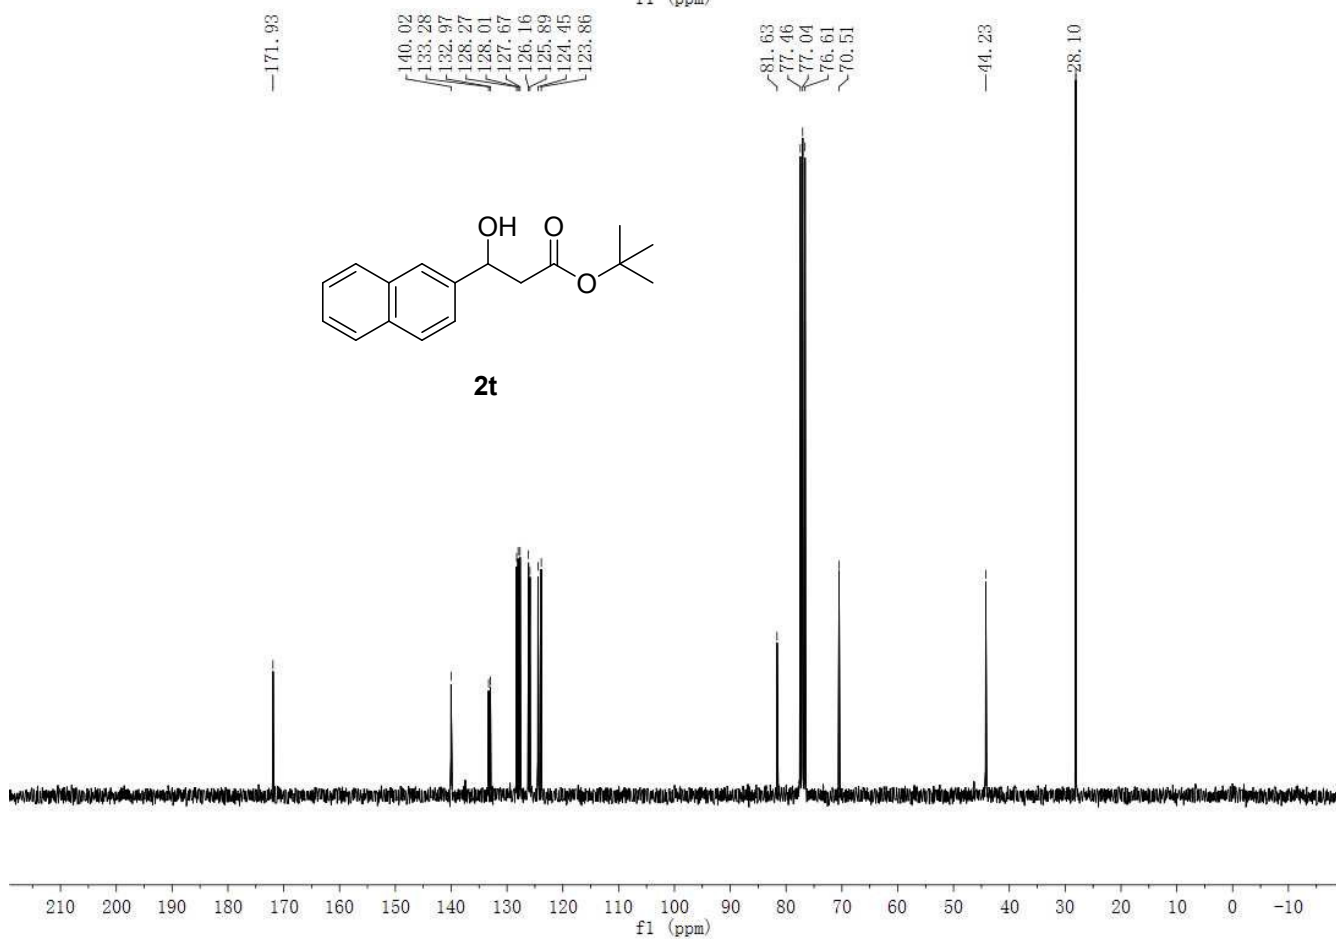

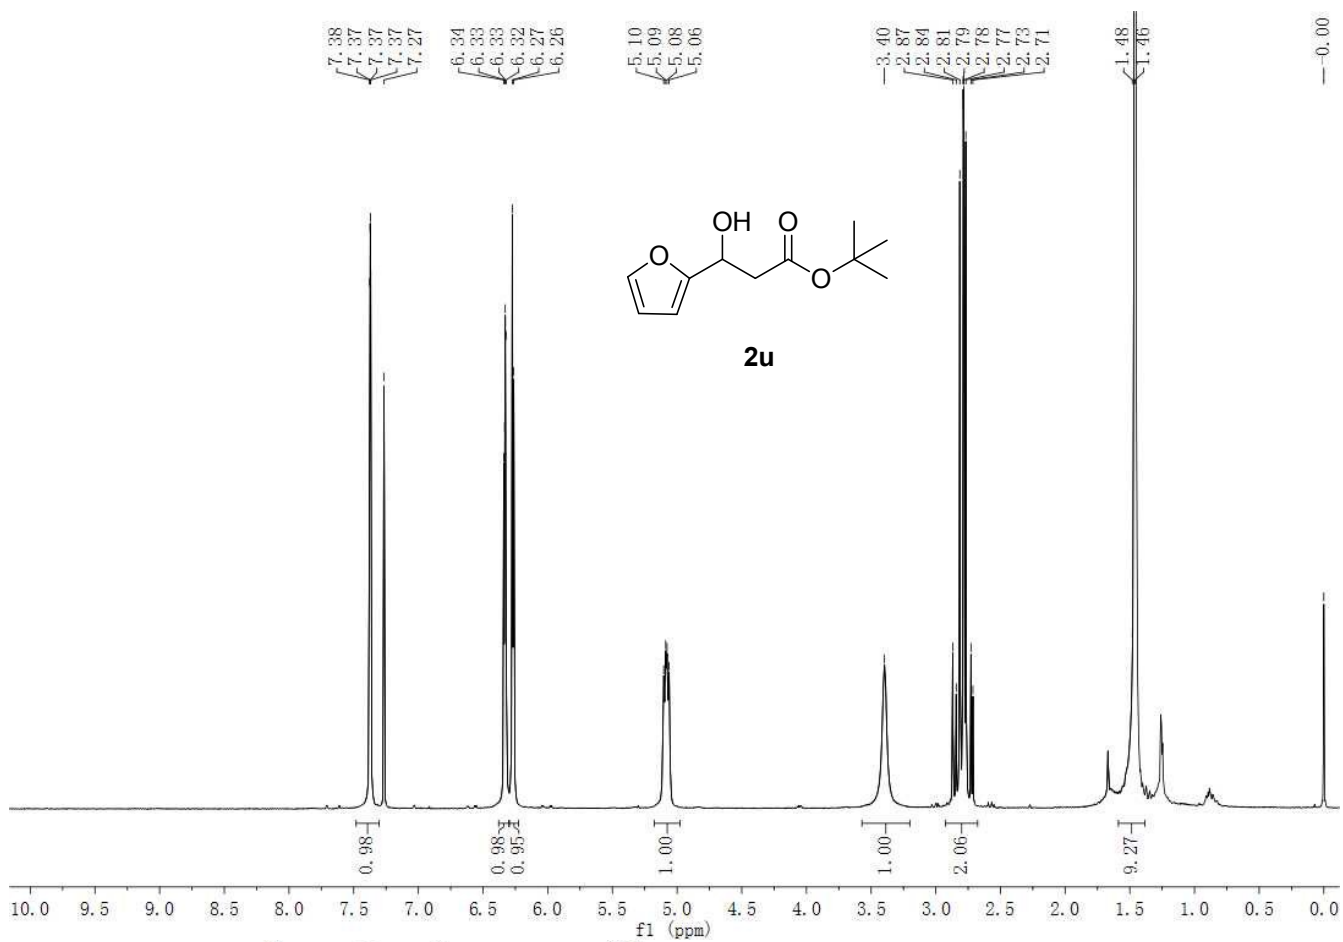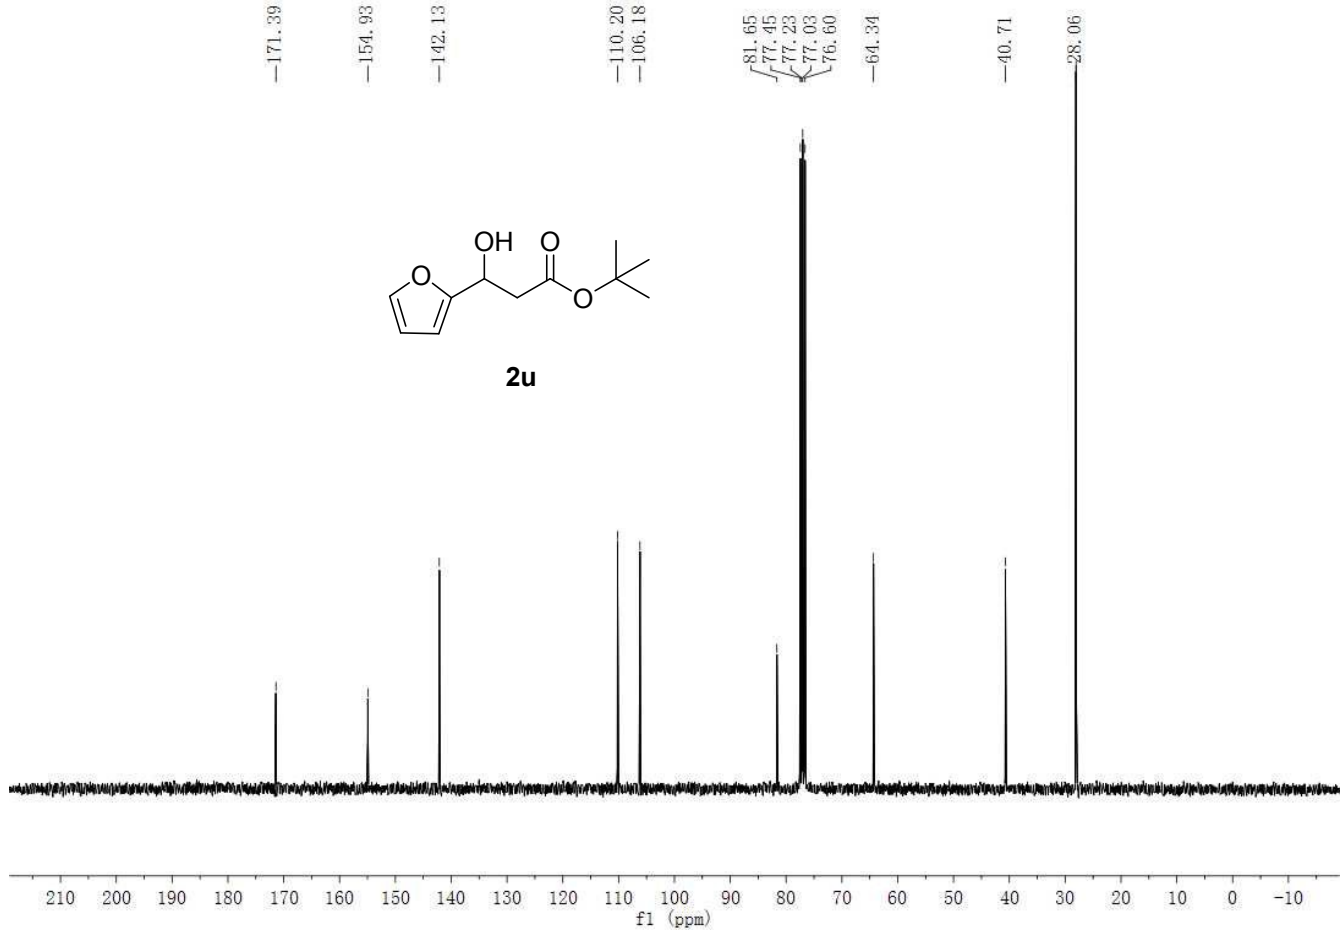

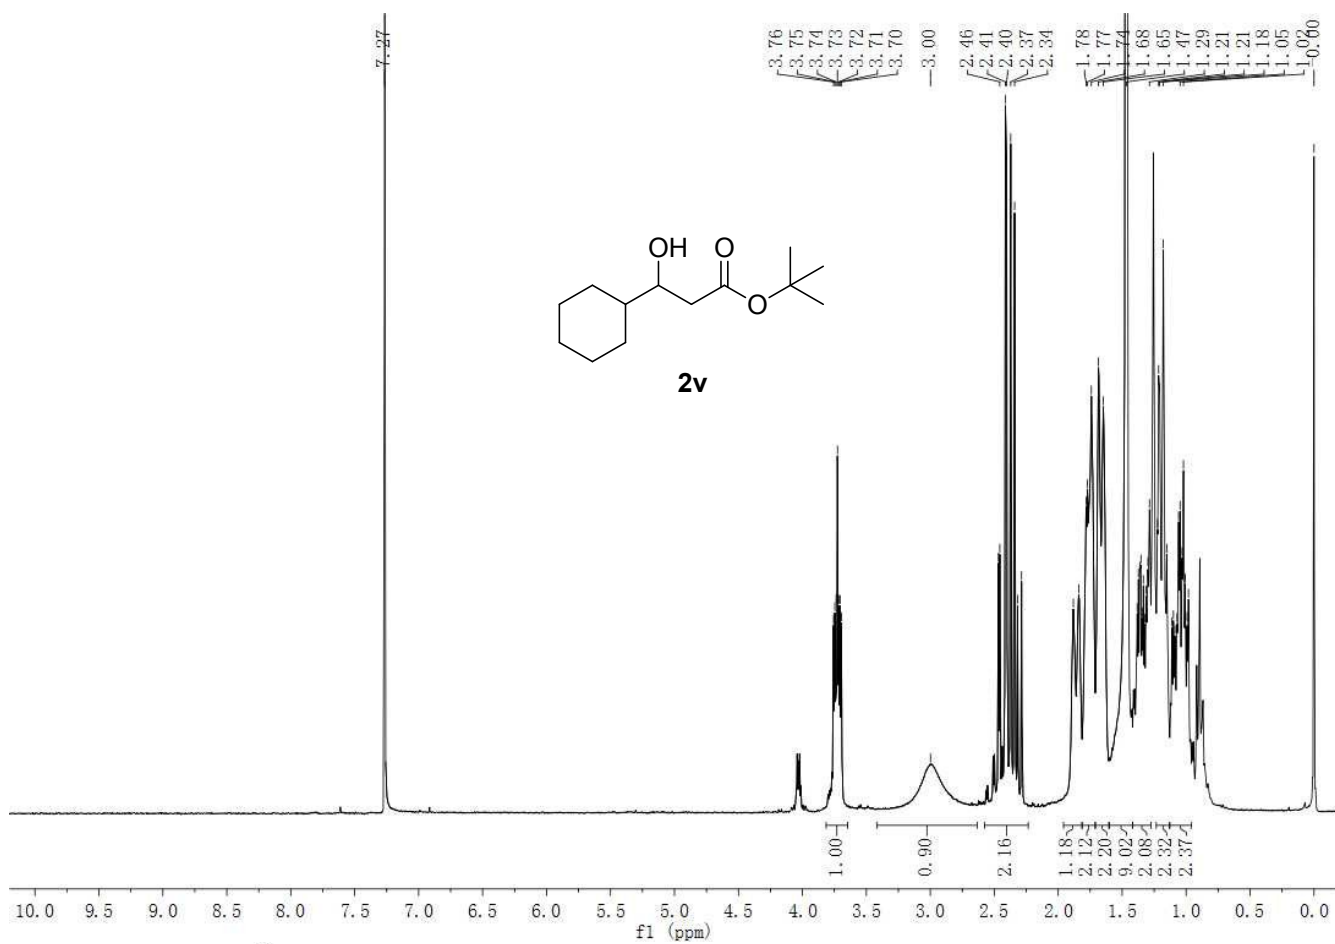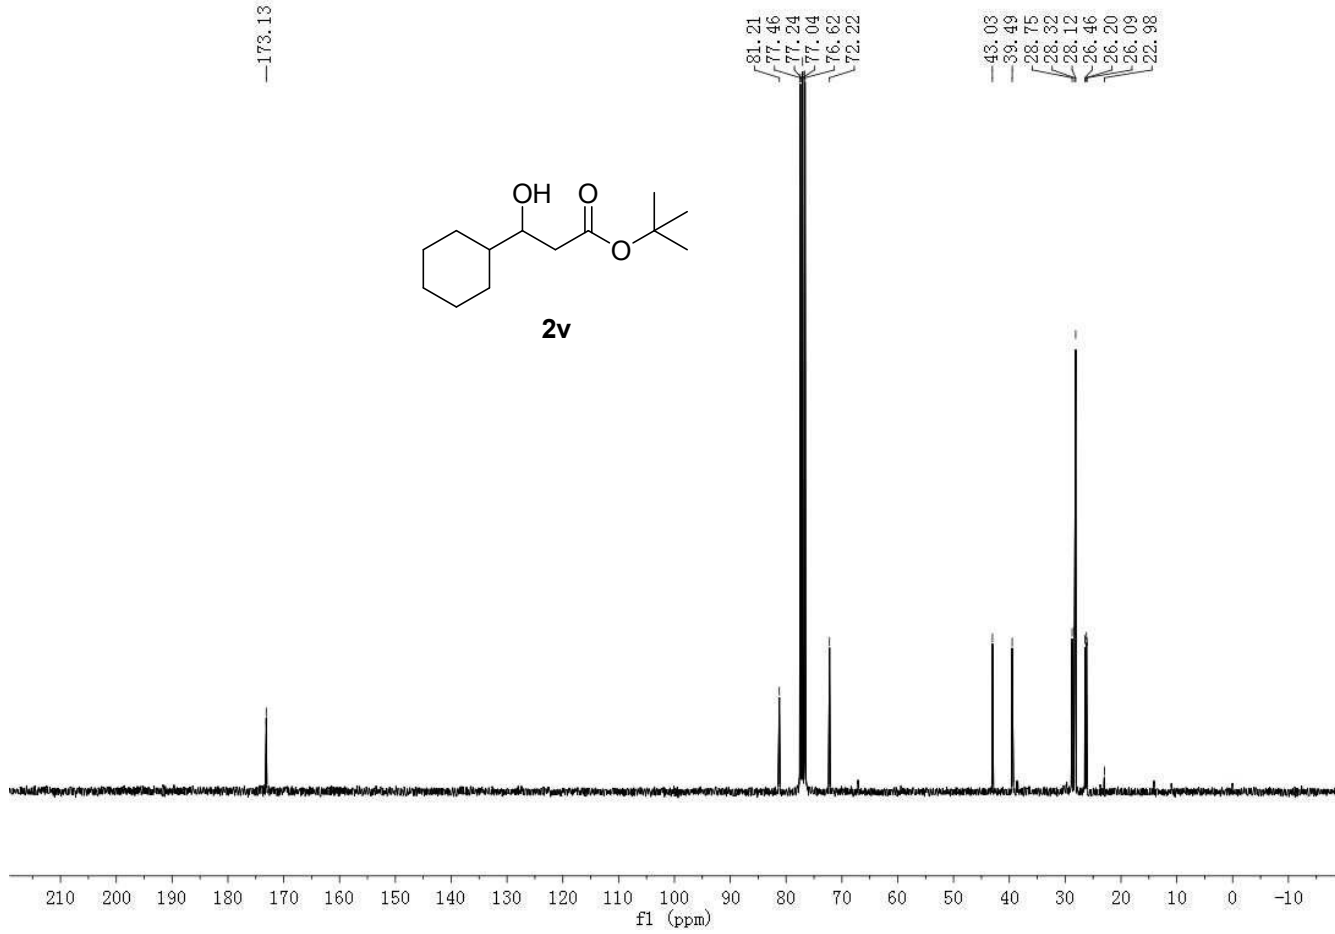

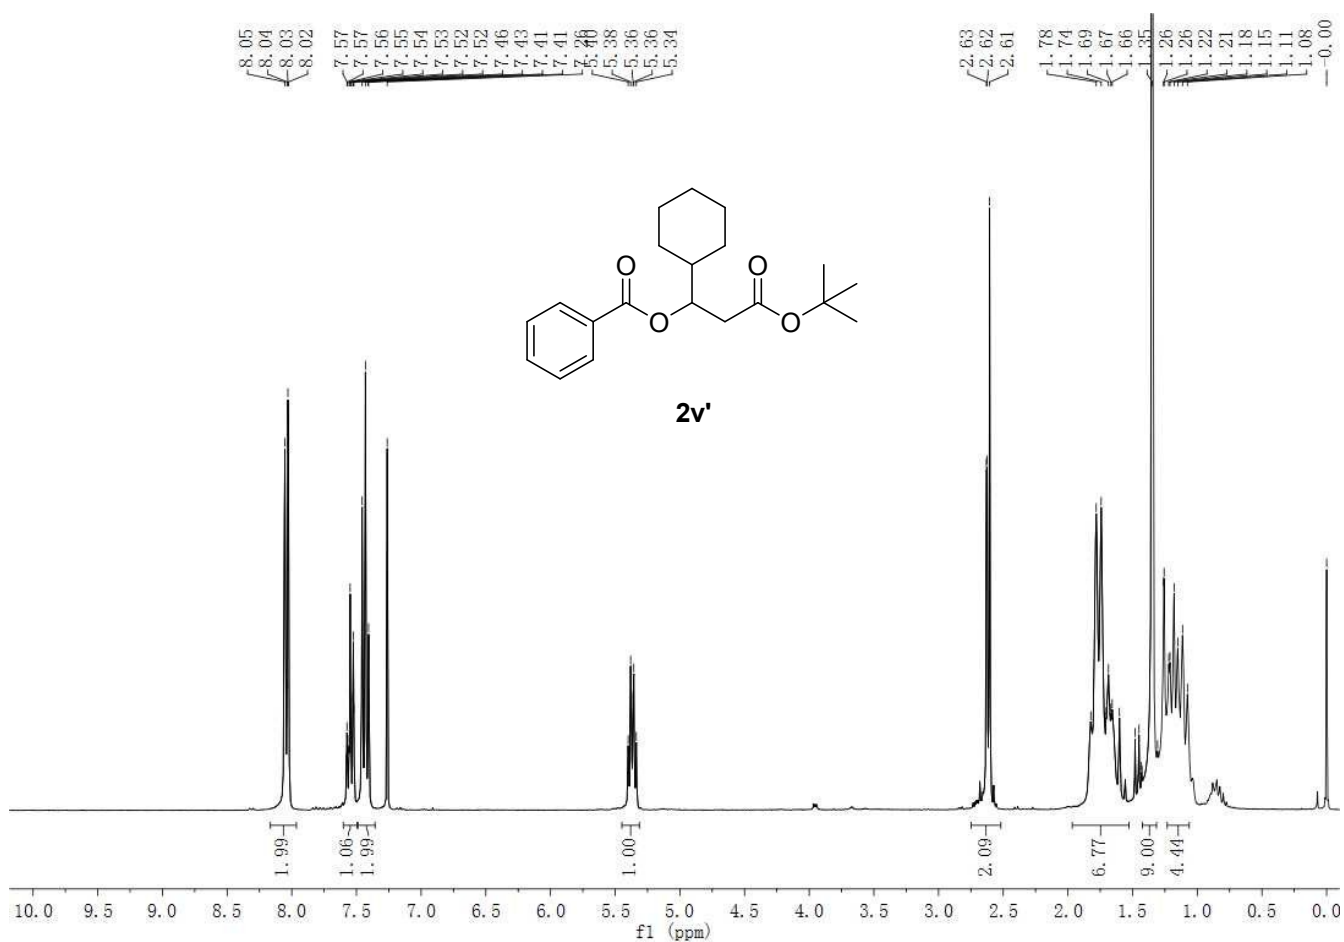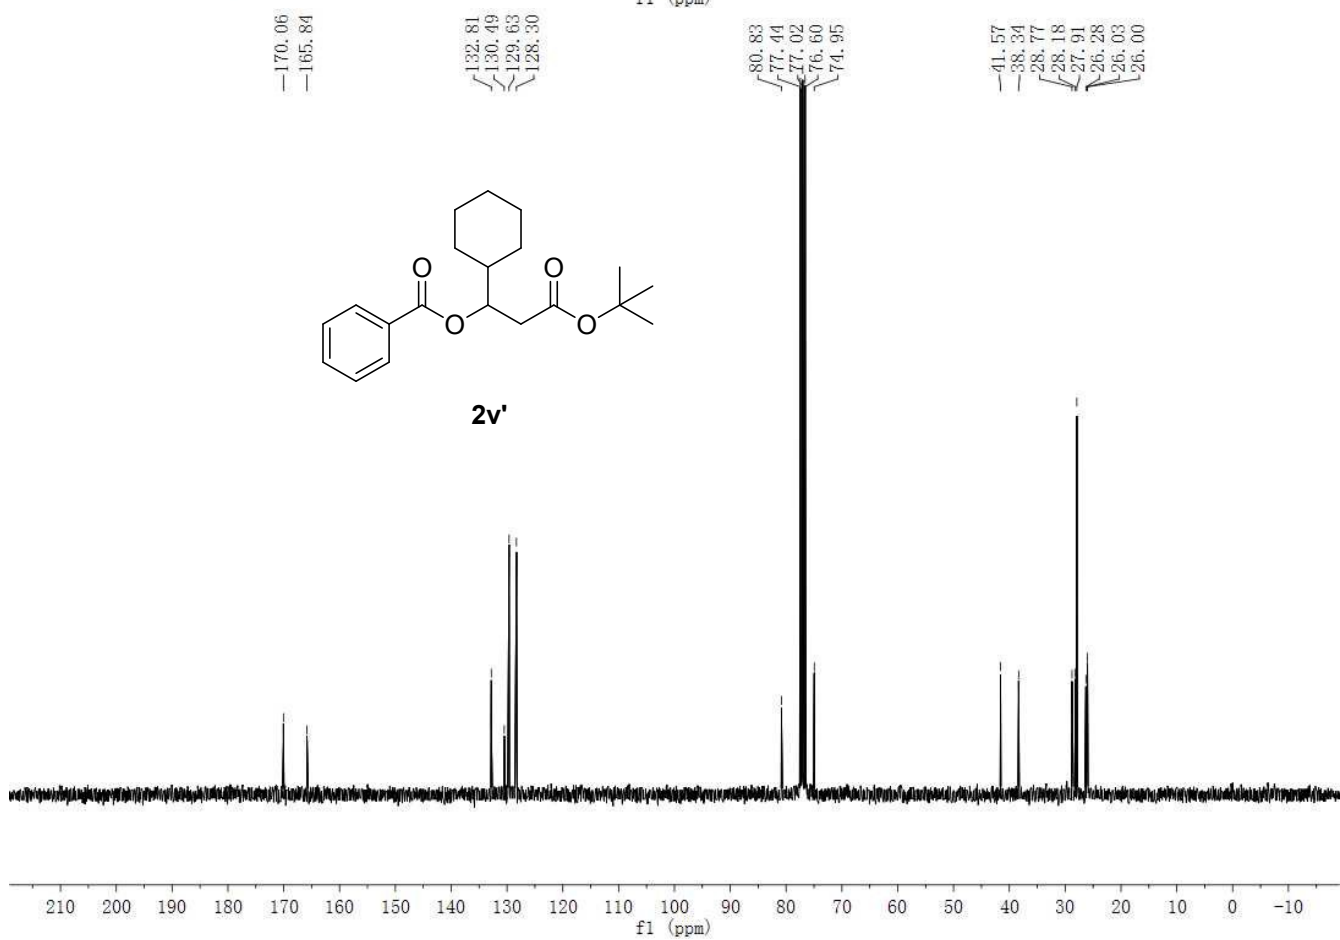

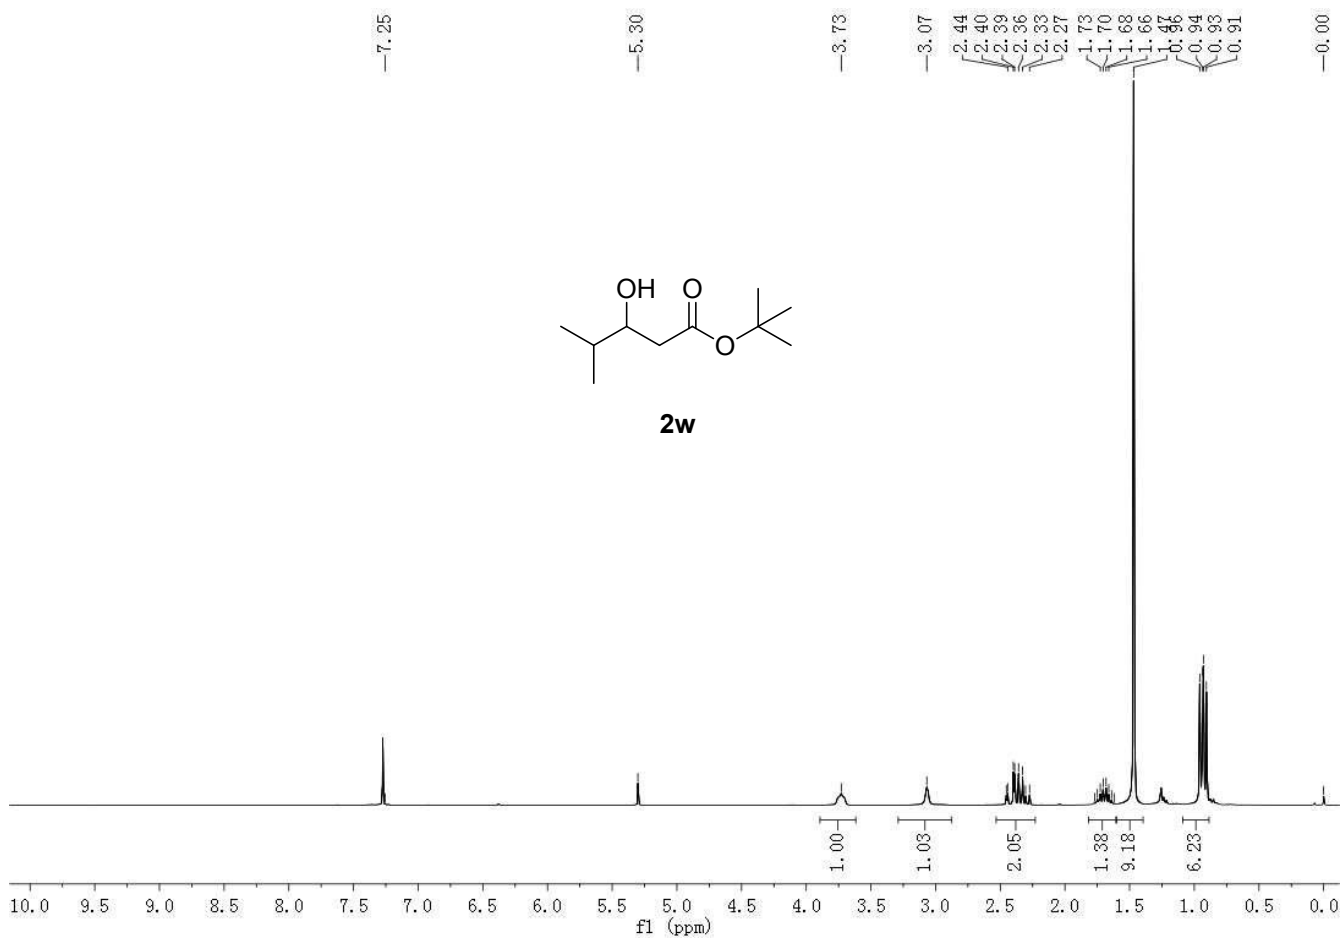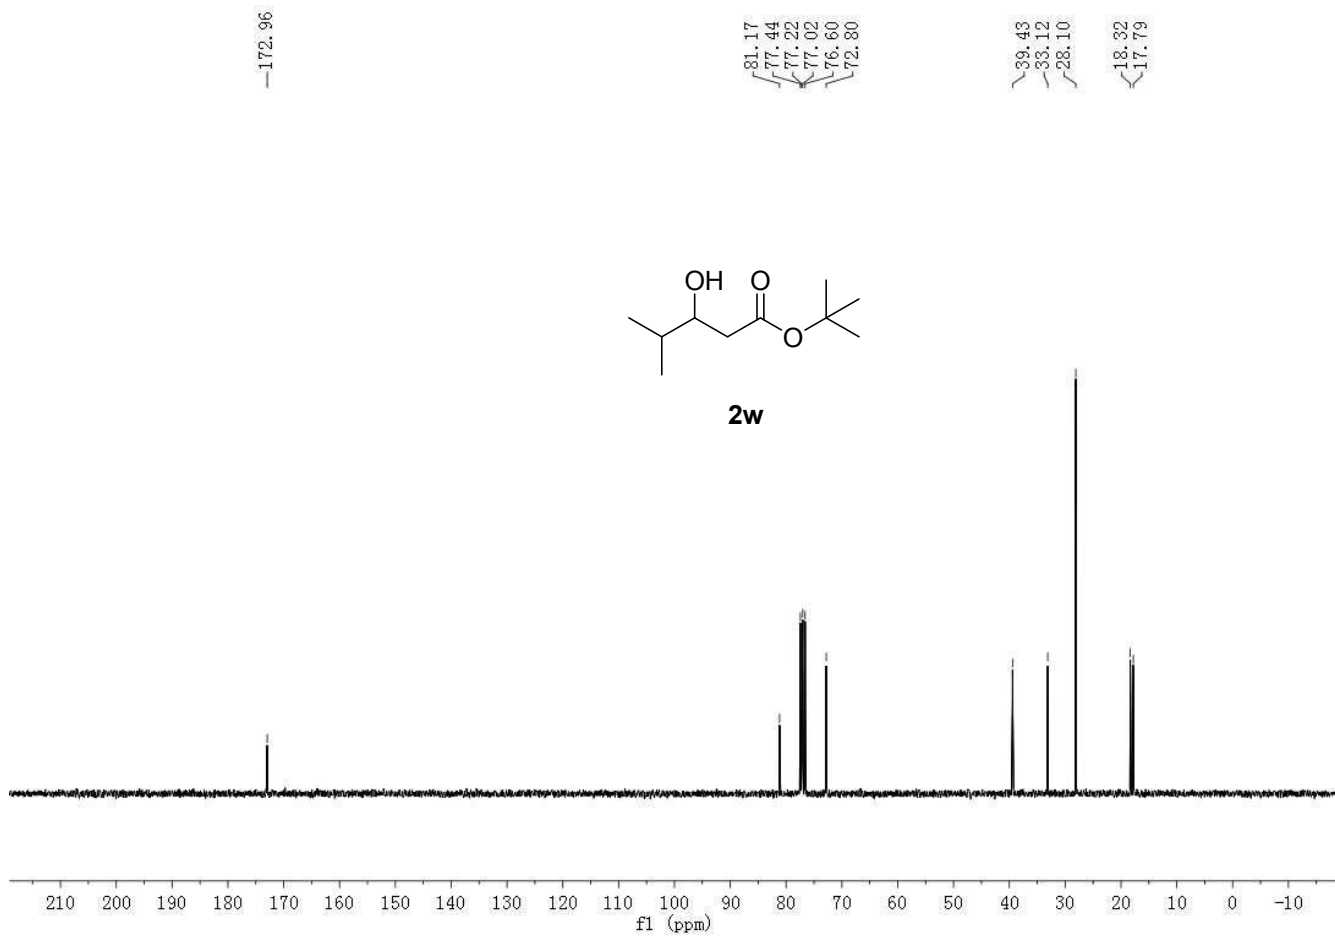

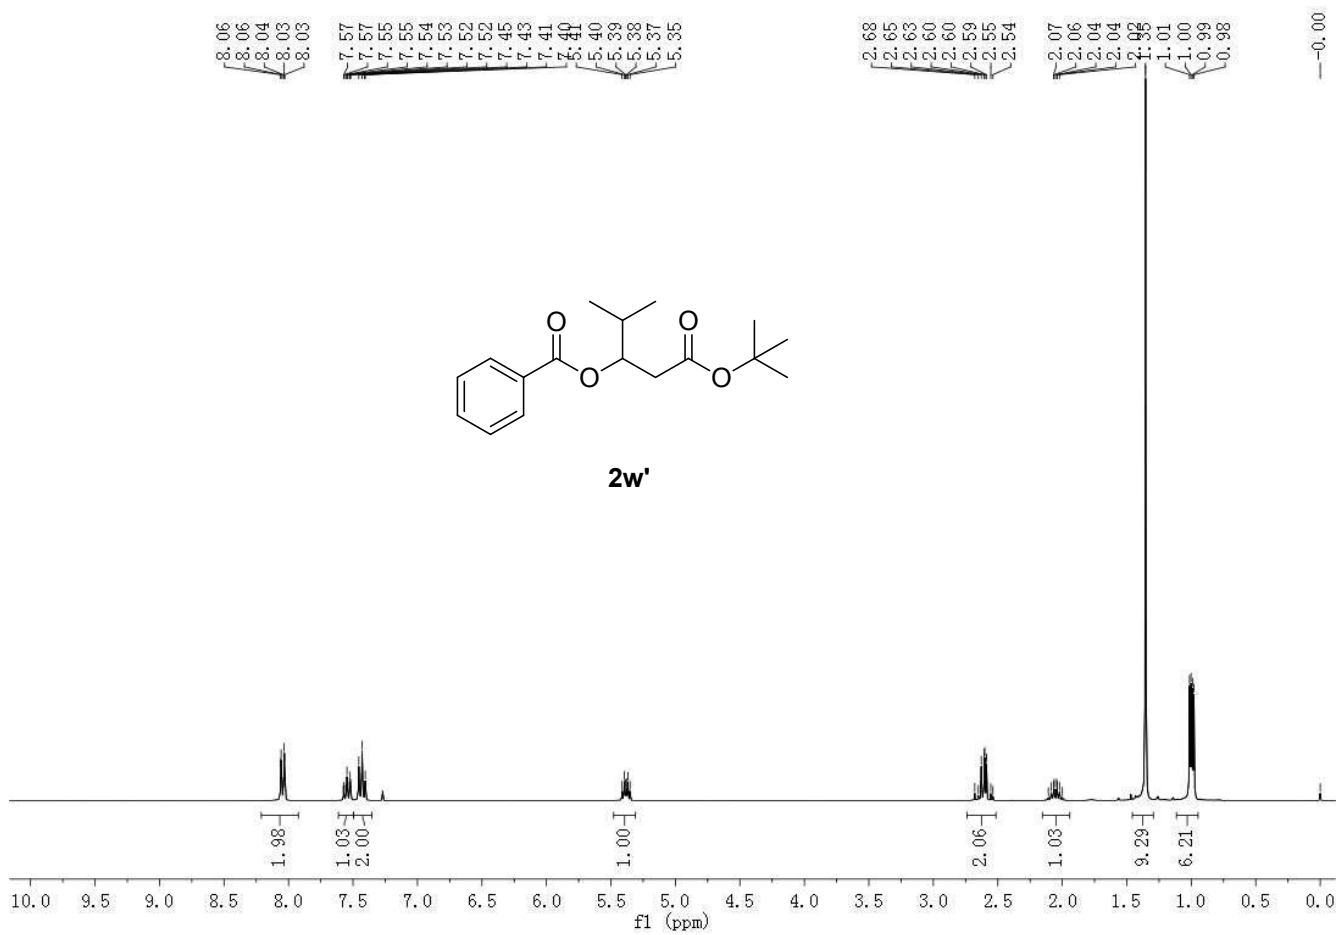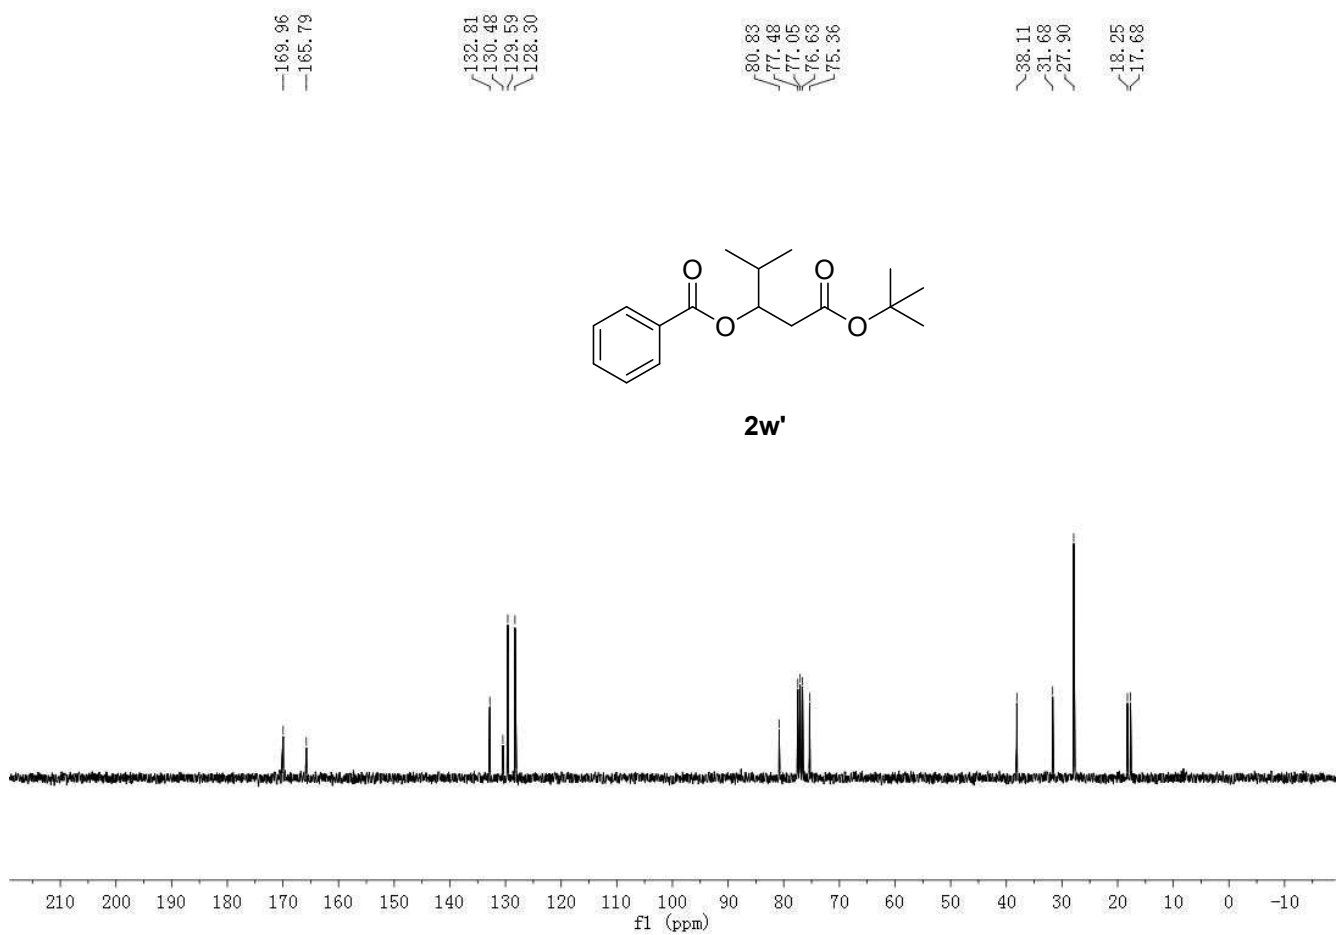





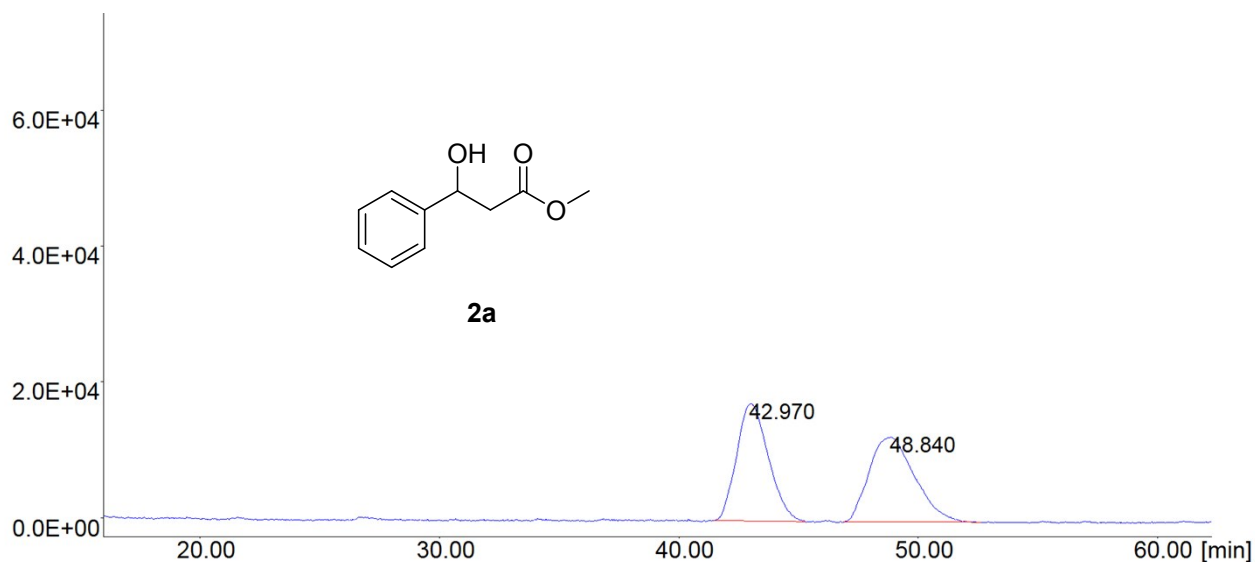

| # | Name | RT     | Height | Area        | %Area  |
|---|------|--------|--------|-------------|--------|
| 1 |      | 42.970 | 17250  | 1572906.903 | 49.167 |
| 2 |      | 48.840 | 12490  | 1626190.184 | 50.833 |

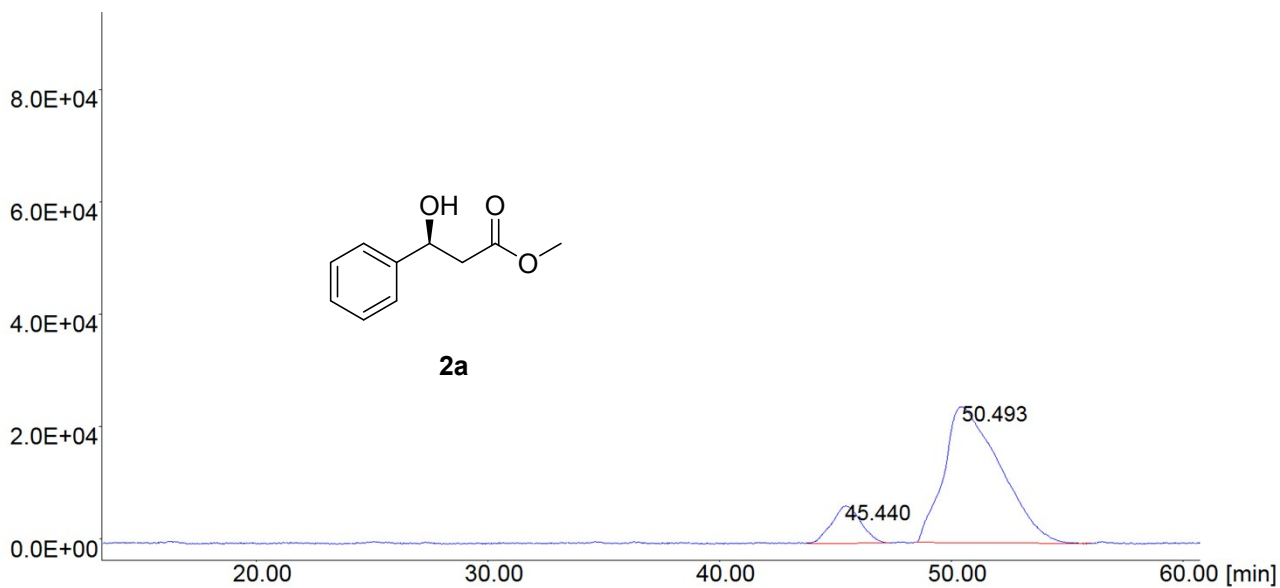

| # | Name | RT     | Height | Area        | %Area  |
|---|------|--------|--------|-------------|--------|
| 1 |      | 45.440 | 6594   | 564667.679  | 12.188 |
| 2 |      | 50.493 | 24184  | 4068421.405 | 87.812 |

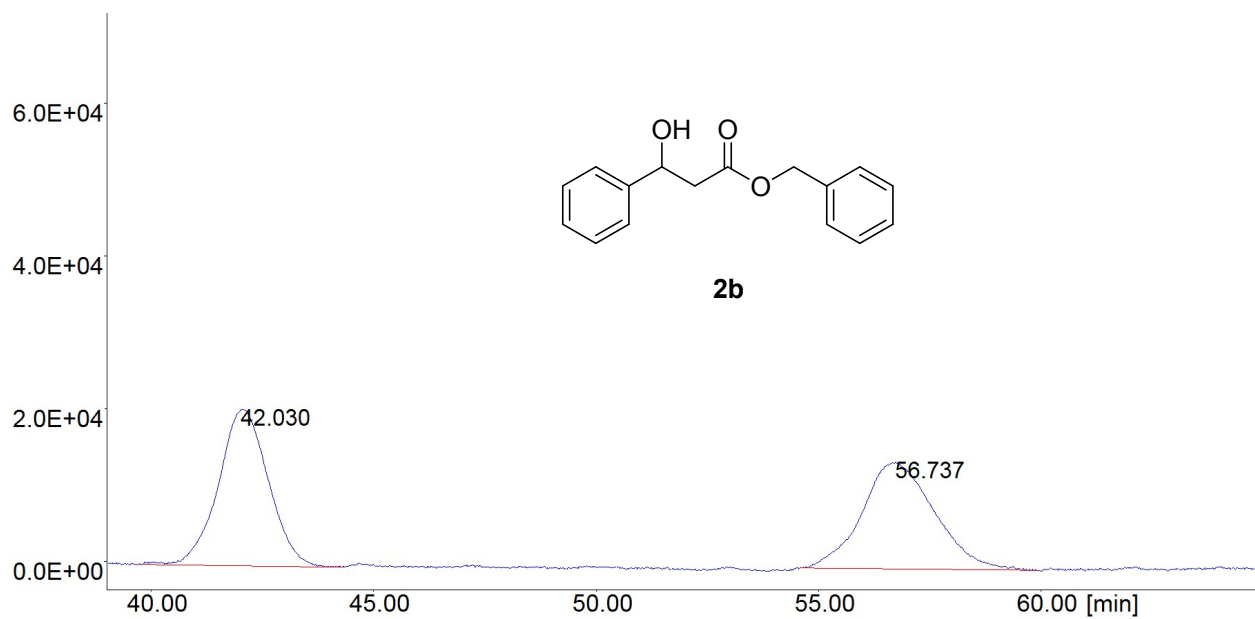

| # | Name | RT     | Height | Area        | %Area  |
|---|------|--------|--------|-------------|--------|
| 1 |      | 42.030 | 20472  | 1584613.037 | 50.314 |
| 2 |      | 56.737 | 13973  | 1564858.569 | 49.686 |

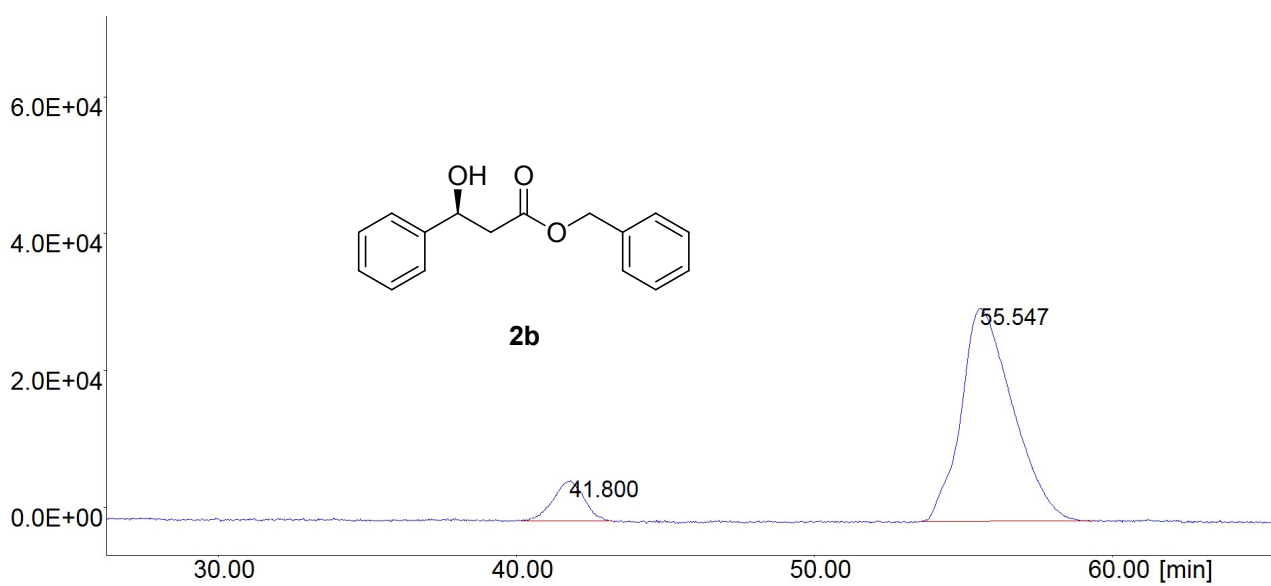

| # | Name | RT     | Height | Area        | %Area  |
|---|------|--------|--------|-------------|--------|
| 1 |      | 41.800 | 5818   | 409779.940  | 9.954  |
| 2 |      | 55.547 | 31029  | 3706910.875 | 90.046 |

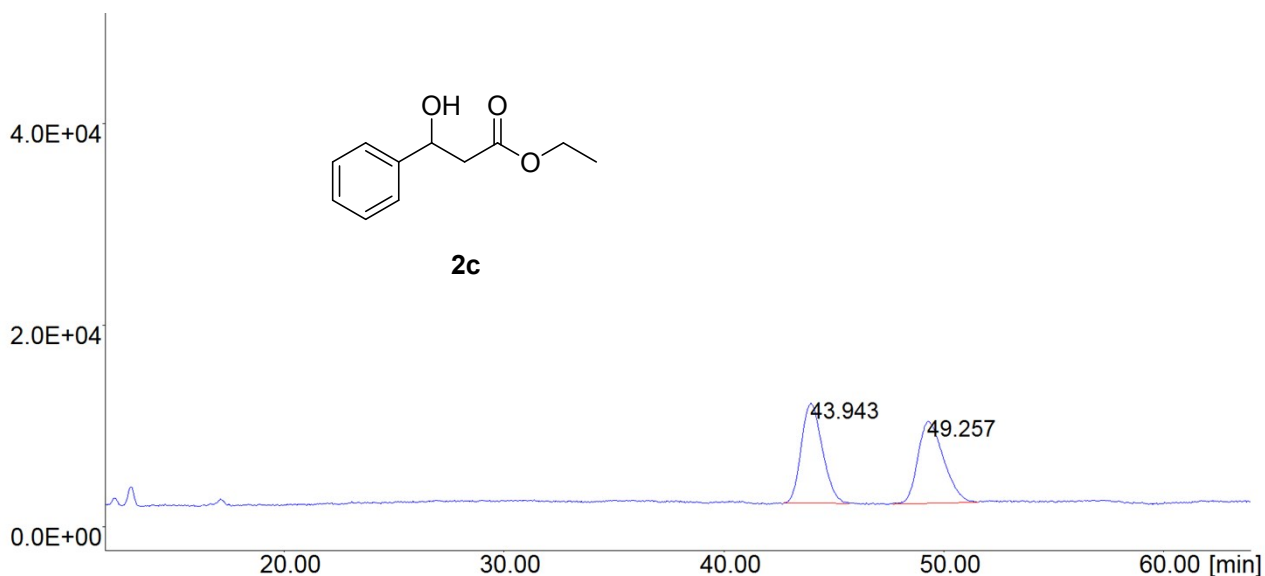

| # | Name | RT     | Height | Area       | %Area  |
|---|------|--------|--------|------------|--------|
| 1 |      | 43.943 | 9891   | 644493.449 | 50.163 |
| 2 |      | 49.257 | 8145   | 640304.556 | 49.837 |

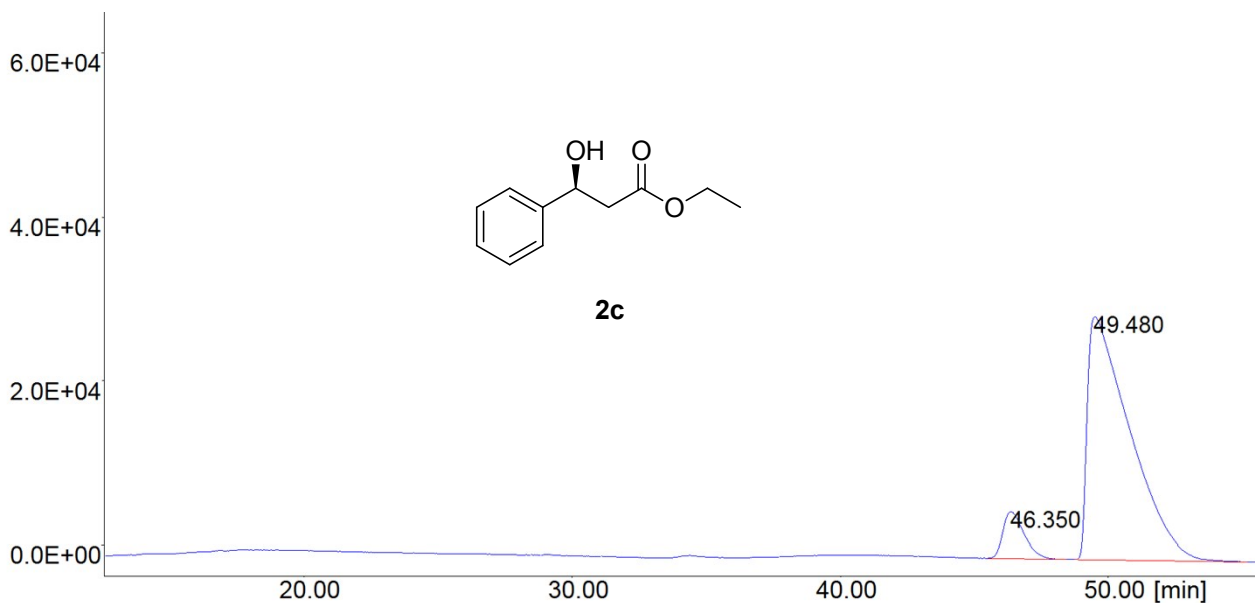

| # | Name | RT     | Height | Area        | %Area  |
|---|------|--------|--------|-------------|--------|
| 1 |      | 46.350 | 5682   | 307759.498  | 8.661  |
| 2 |      | 49.480 | 29647  | 3245435.235 | 91.339 |

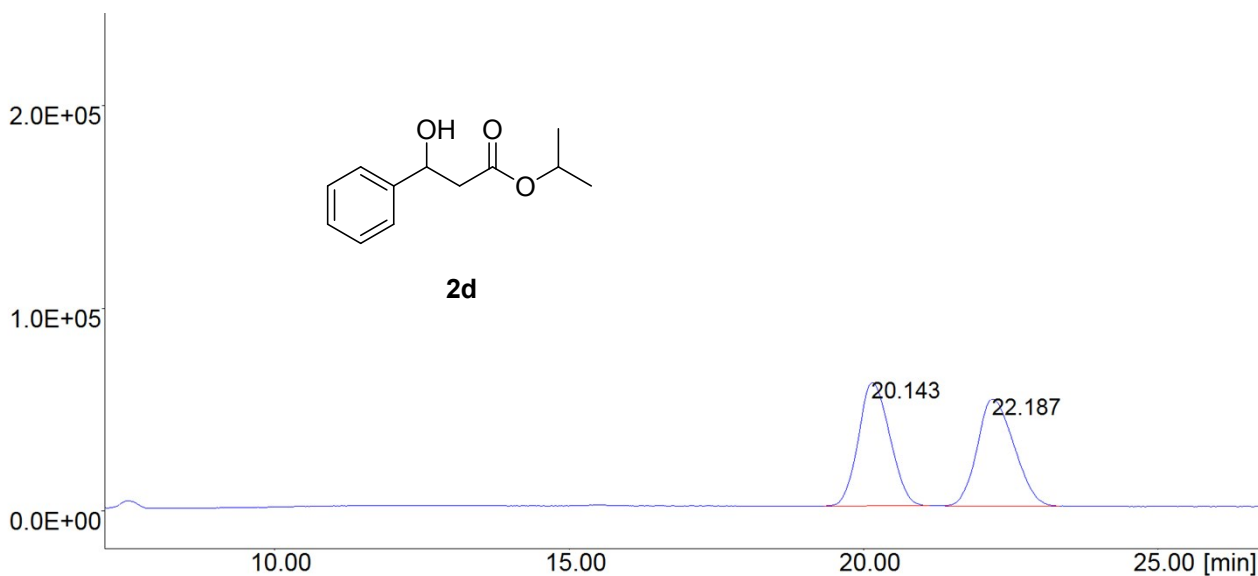

| # | Name | RT     | Height | Area        | %Area  |
|---|------|--------|--------|-------------|--------|
| 1 |      | 20.143 | 60787  | 2226210.744 | 49.672 |
| 2 |      | 22.187 | 52620  | 2255624.600 | 50.328 |

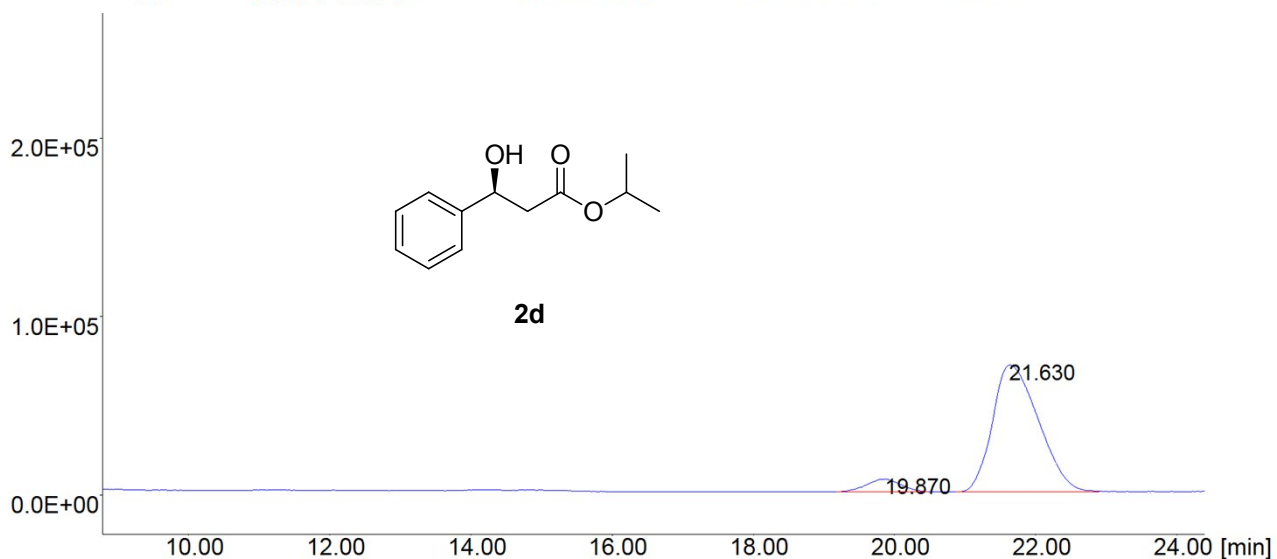

| # | Name | RT     | Height | Area        | %Area  |
|---|------|--------|--------|-------------|--------|
| 1 |      | 19.870 | 6833   | 221448.077  | 6.546  |
| 2 |      | 21.630 | 70958  | 3161735.702 | 93.454 |

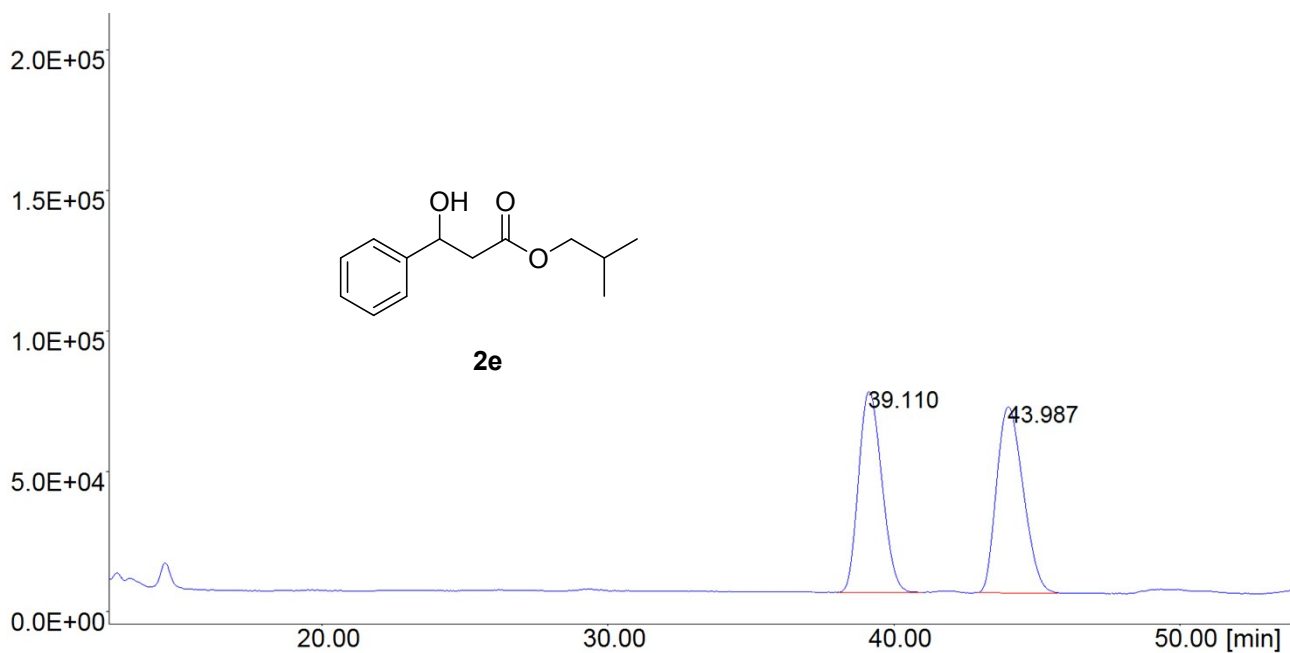

| # | Name | RT     | Height | Area        | %Area  |
|---|------|--------|--------|-------------|--------|
| 1 |      | 39.110 | 71500  | 3971946.303 | 48.579 |
| 2 |      | 43.987 | 66172  | 4204233.662 | 51.421 |

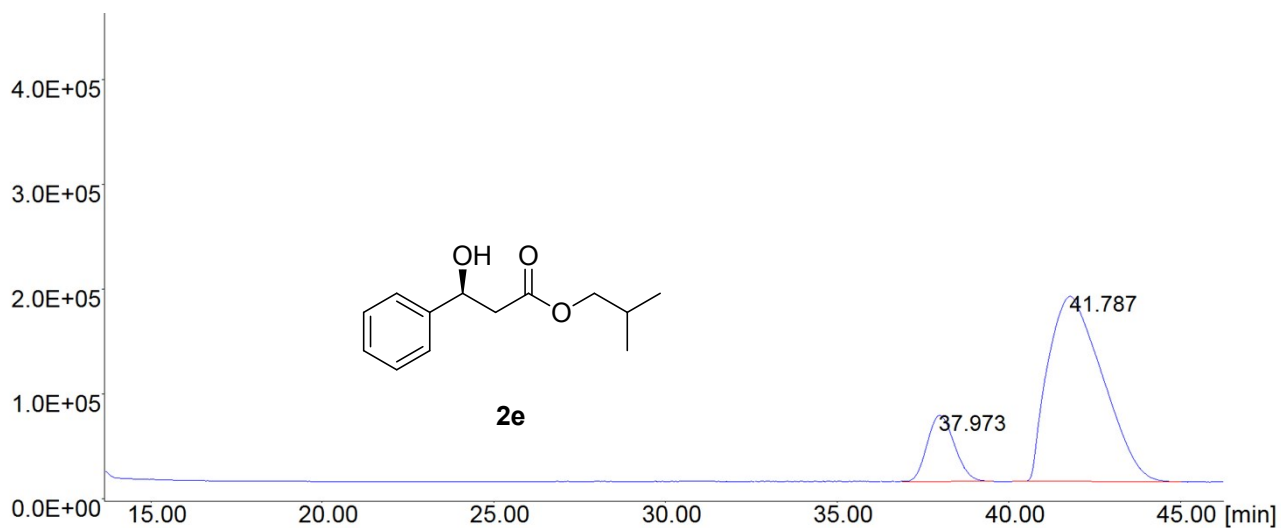

| # | Name | RT     | Height | Area         | %Area  |
|---|------|--------|--------|--------------|--------|
| 1 |      | 40.337 | 30377  | 1795432.517  | 14.826 |
| 2 |      | 44.757 | 125385 | 10314716.661 | 85.174 |

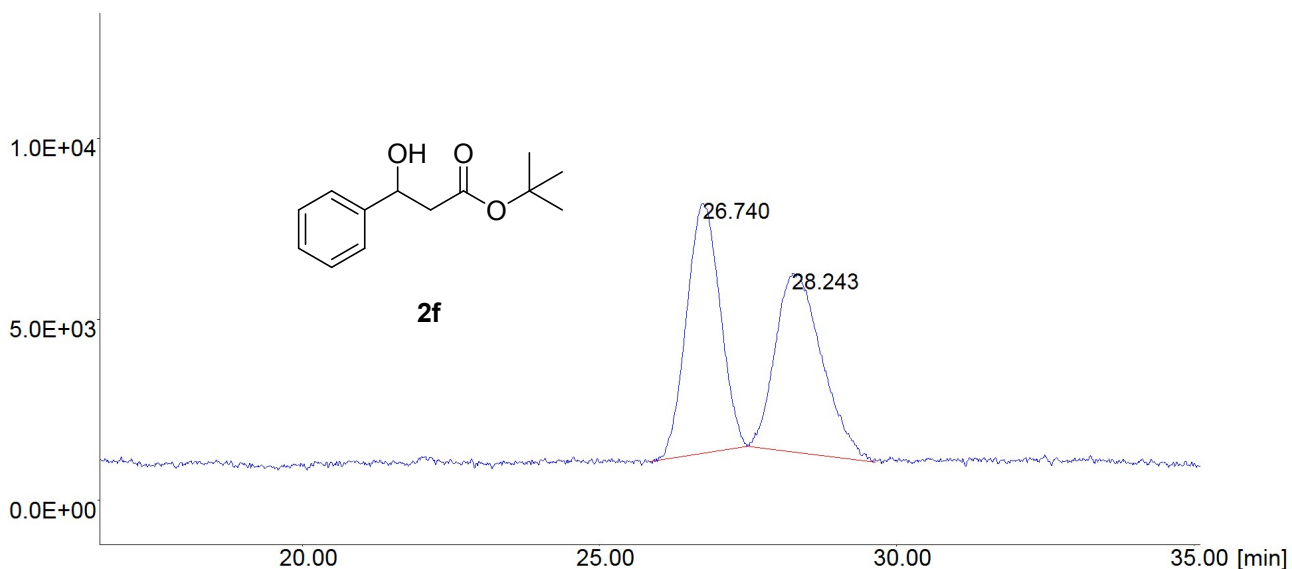

| # | Name | RT     | Height | Area       | %Area  |
|---|------|--------|--------|------------|--------|
| 1 |      | 26.740 | 6905   | 267444.225 | 50.099 |
| 2 |      | 28.243 | 4929   | 266391.232 | 49.901 |

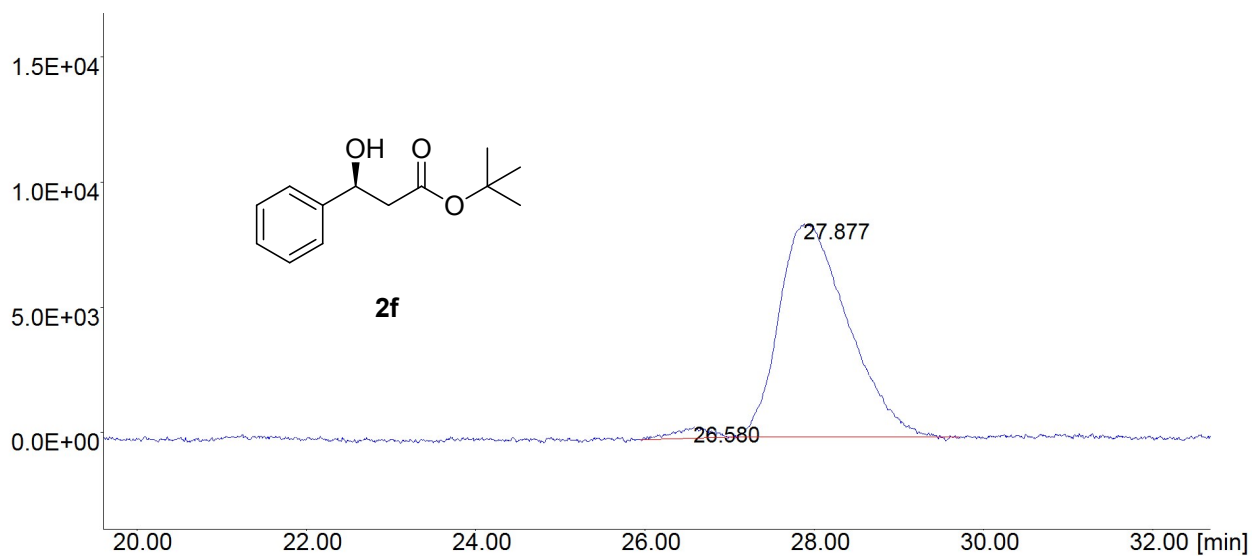

| # | Name | RT     | Height | Area       | %Area  |
|---|------|--------|--------|------------|--------|
| 1 |      | 26.580 | 434    | 12205.089  | 2.480  |
| 2 |      | 27.877 | 8511   | 479976.400 | 97.520 |

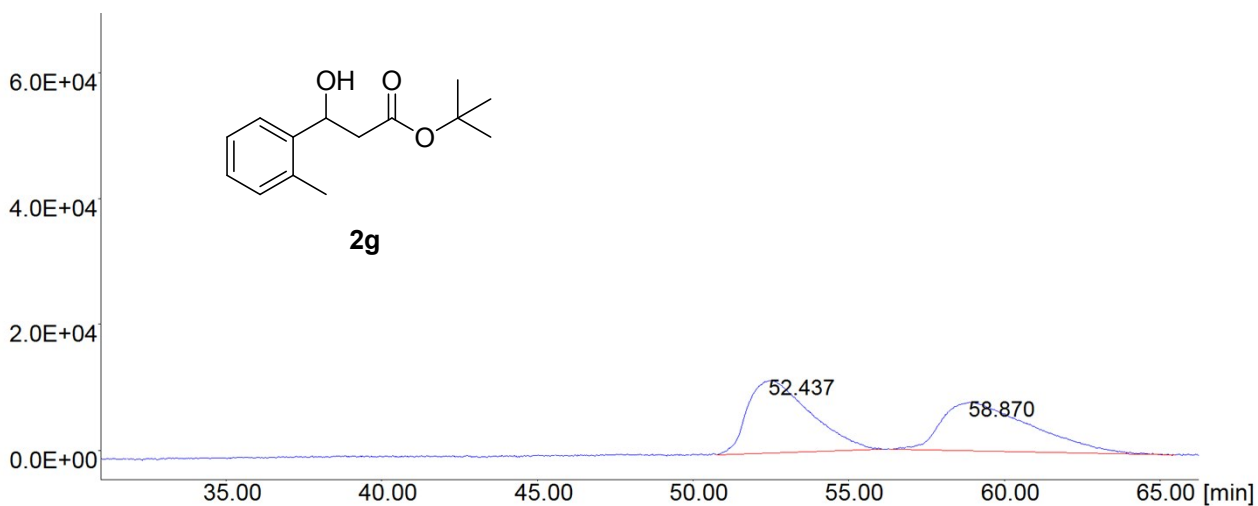

| # | Name | RT     | Height | Area        | %Area  |
|---|------|--------|--------|-------------|--------|
| 1 |      | 52.437 | 11526  | 1589953.180 | 50.745 |
| 2 |      | 58.870 | 7759   | 1543269.225 | 49.255 |

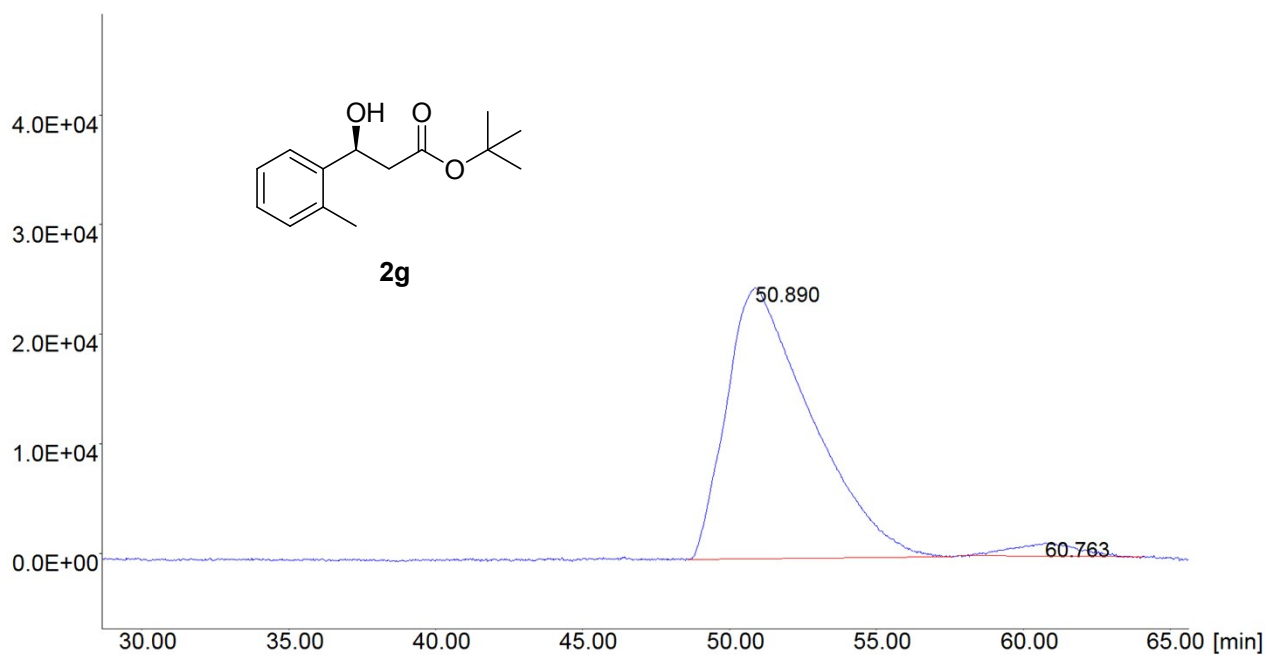

| # | Name | RT     | Height | Area        | %Area  |
|---|------|--------|--------|-------------|--------|
| 1 |      | 50.890 | 24744  | 4929468.146 | 96.475 |
| 2 |      | 60.763 | 1210   | 180138.311  | 3.525  |



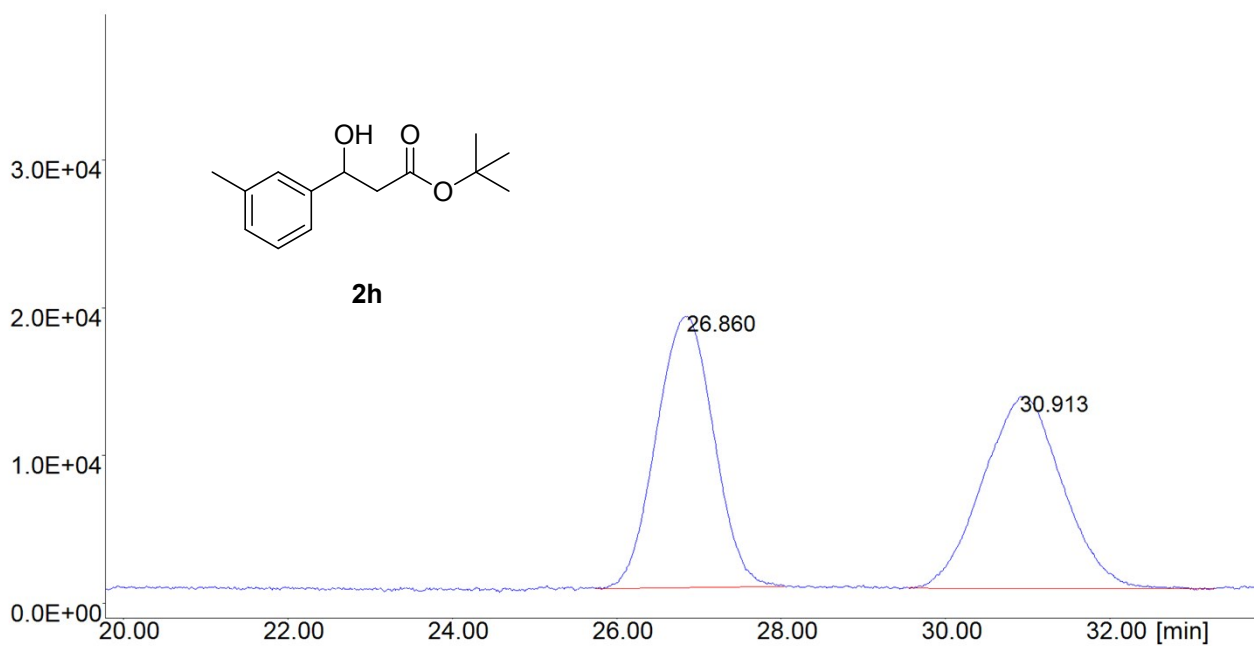

| # | Name | RT     | Height | Area       | %Area  |
|---|------|--------|--------|------------|--------|
| 1 |      | 26.860 | 18394  | 885435.471 | 50.471 |
| 2 |      | 30.913 | 12979  | 868908.655 | 49.529 |

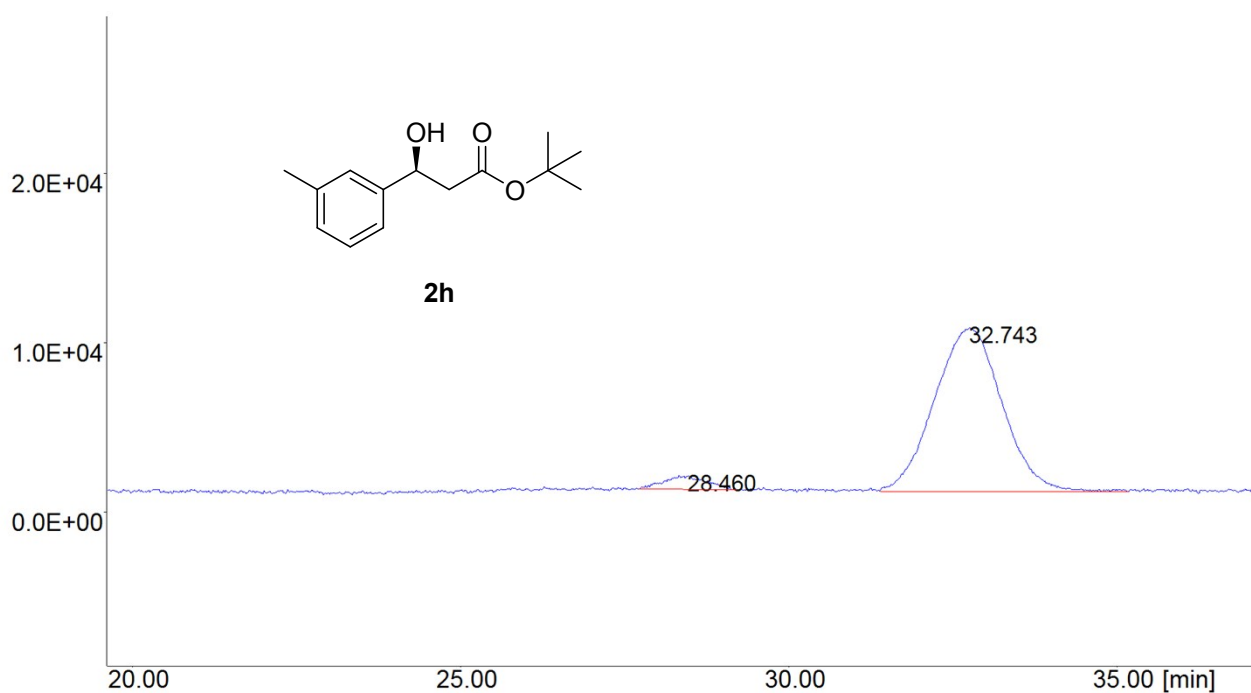

| # | Name | RT     | Height | Area       | %Area  |
|---|------|--------|--------|------------|--------|
| 1 |      | 28.460 | 823    | 34734.184  | 4.796  |
| 2 |      | 32.743 | 9704   | 689555.470 | 95.204 |

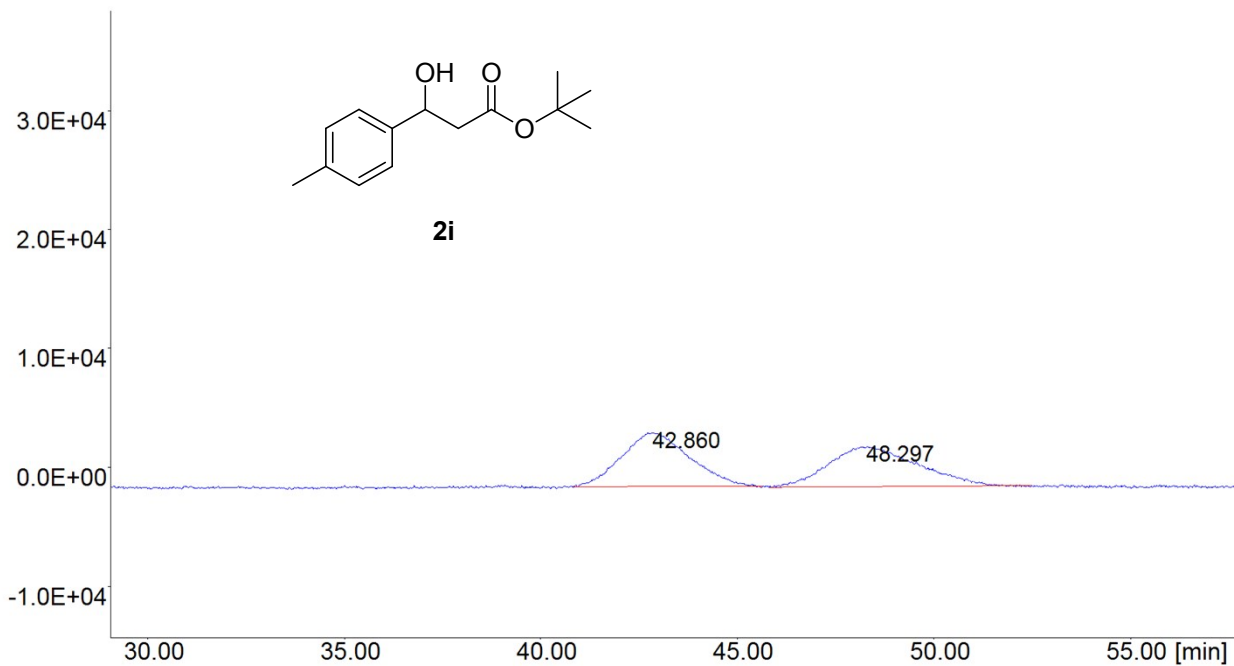

| # | Name | RT     | Height | Area       | %Area  |
|---|------|--------|--------|------------|--------|
| 1 |      | 42.860 | 4533   | 536592.655 | 50.689 |
| 2 |      | 48.297 | 3397   | 522010.967 | 49.311 |

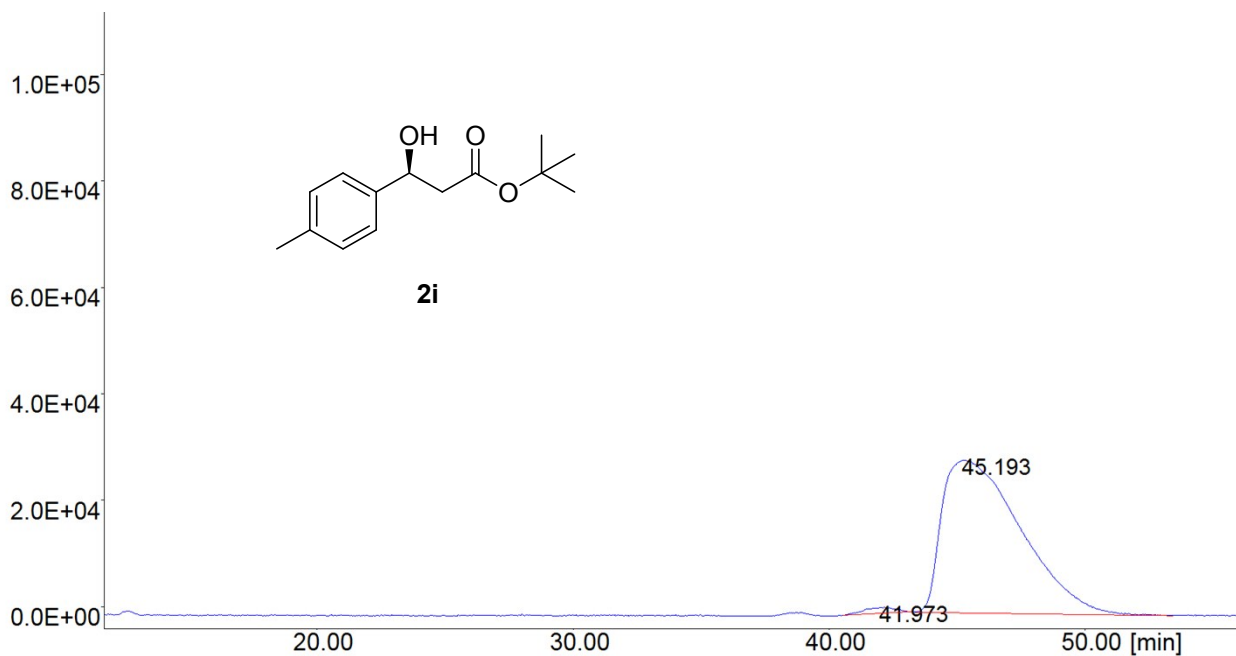

| # | Name | RT     | Height | Area        | %Area  |
|---|------|--------|--------|-------------|--------|
| 1 |      | 41.973 | 1185   | 92228.244   | 1.488  |
| 2 |      | 45.193 | 28703  | 6106451.726 | 98.512 |

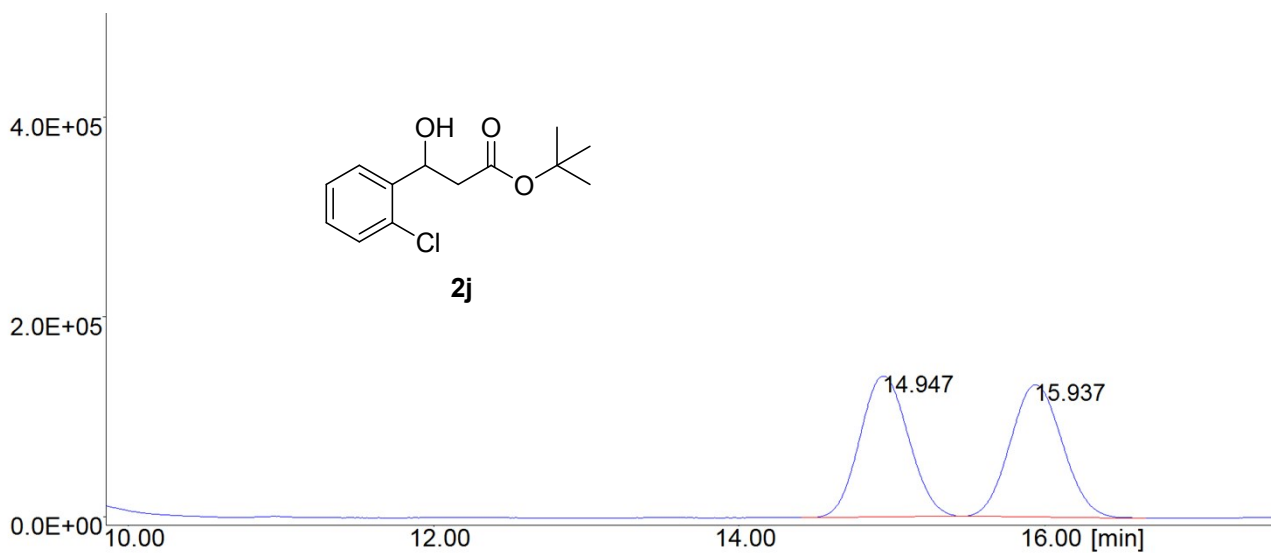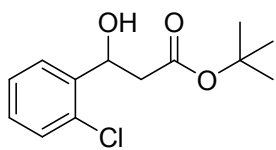

2j

| # | Name | RT     | Height | Area        | %Area  |
|---|------|--------|--------|-------------|--------|
| 1 |      | 14.947 | 141287 | 3097453.281 | 49.835 |
| 2 |      | 15.937 | 132524 | 3117998.231 | 50.165 |

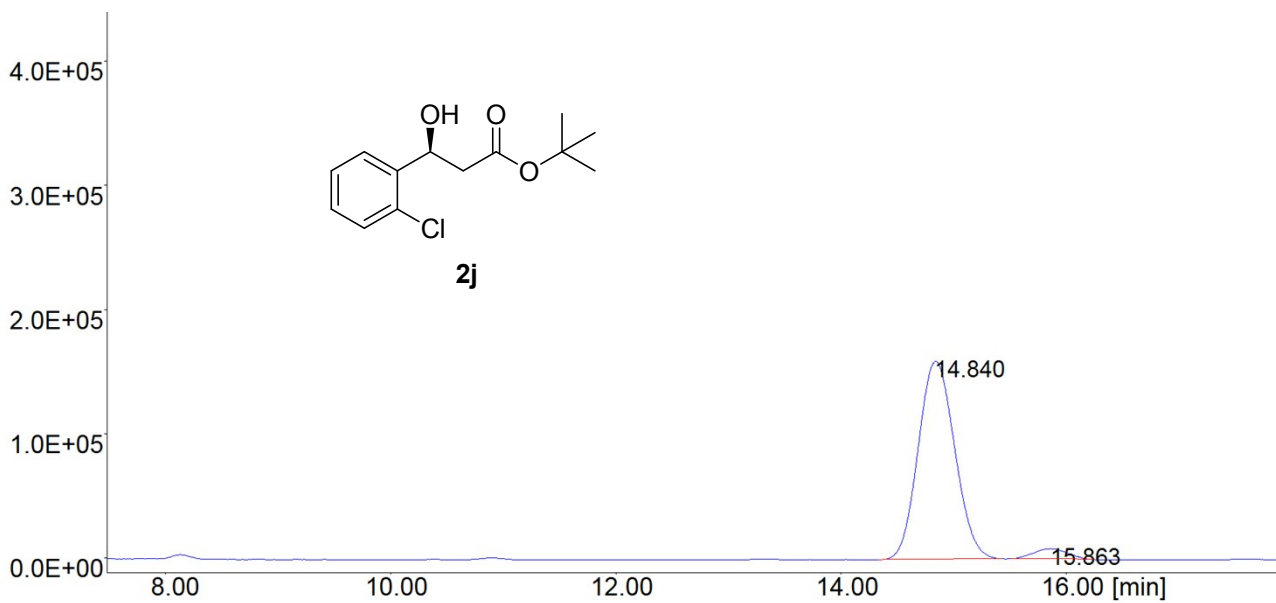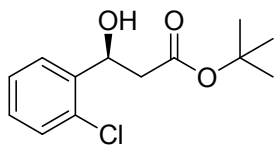

2j

| # | Name | RT     | Height | Area        | %Area  |
|---|------|--------|--------|-------------|--------|
| 1 |      | 14.840 | 159370 | 3544655.435 | 95.457 |
| 2 |      | 15.863 | 8075   | 168695.700  | 4.543  |

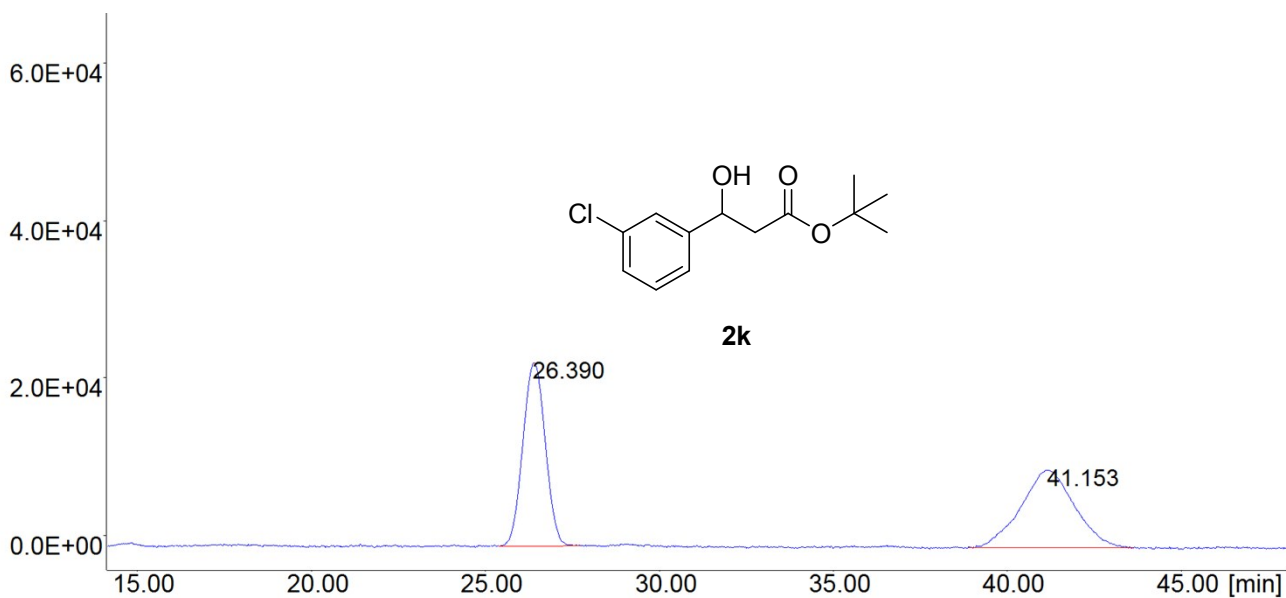

| # | Name | RT     | Height | Area        | %Area  |
|---|------|--------|--------|-------------|--------|
| 1 |      | 26.390 | 23325  | 1020897.243 | 49.586 |
| 2 |      | 41.153 | 9844   | 1037942.758 | 50.414 |

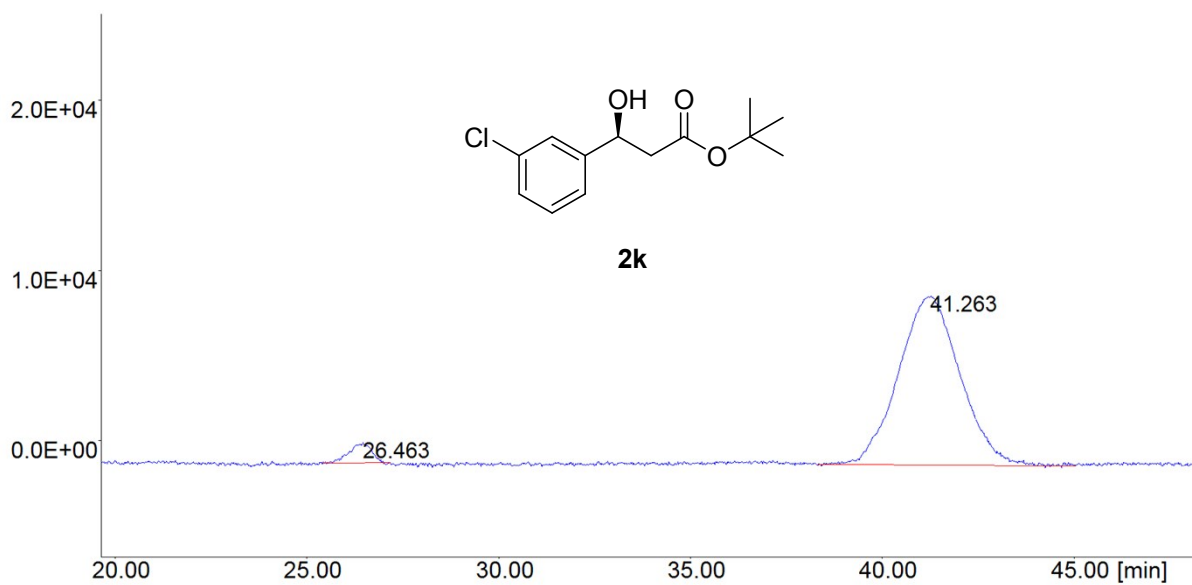

| # | Name | RT     | Height | Area        | %Area  |
|---|------|--------|--------|-------------|--------|
| 1 |      | 26.463 | 1206   | 47604.830   | 4.129  |
| 2 |      | 41.263 | 9927   | 1105406.156 | 95.871 |

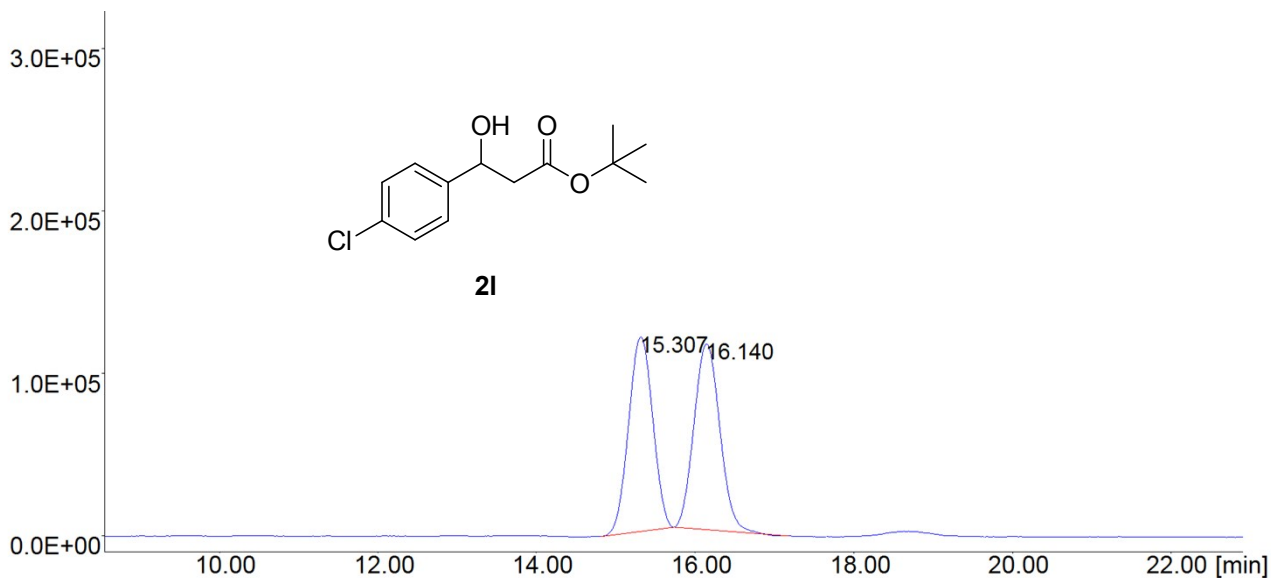

| # | Name | RT     | Height | Area        | %Area  |
|---|------|--------|--------|-------------|--------|
| 1 |      | 15.307 | 119709 | 2486585.649 | 49.308 |
| 2 |      | 16.140 | 114394 | 2556428.137 | 50.692 |

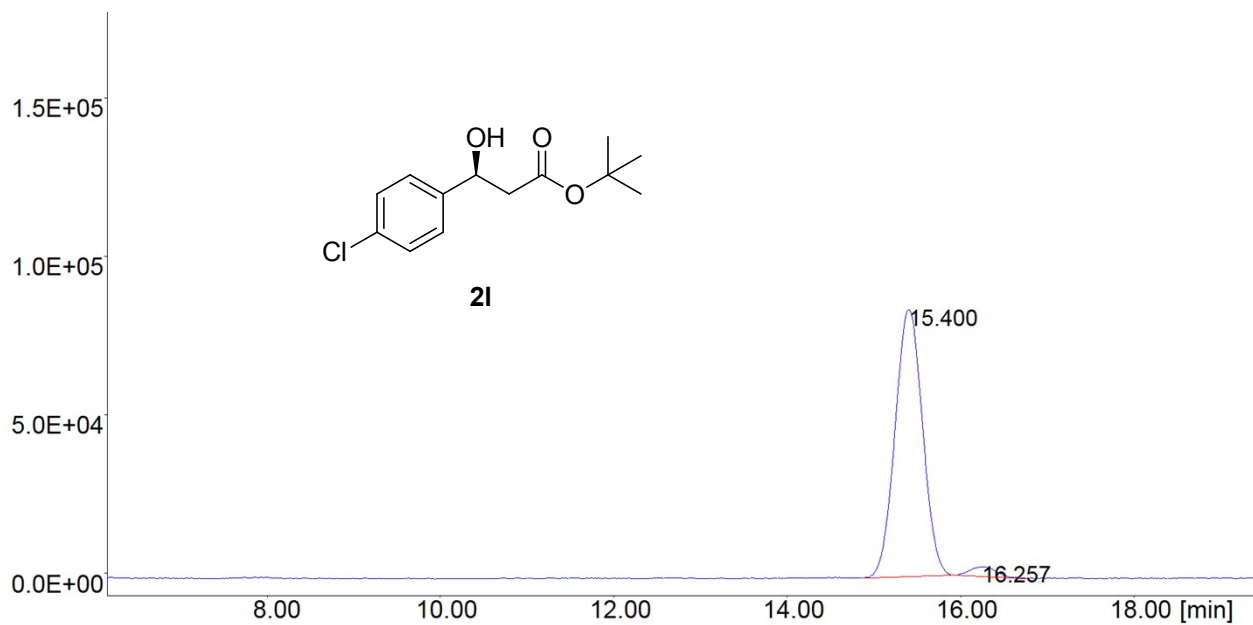

| # | Name | RT     | Height | Area        | %Area  |
|---|------|--------|--------|-------------|--------|
| 1 |      | 15.400 | 83932  | 1815855.871 | 96.646 |
| 2 |      | 16.257 | 3099   | 63008.224   | 3.354  |

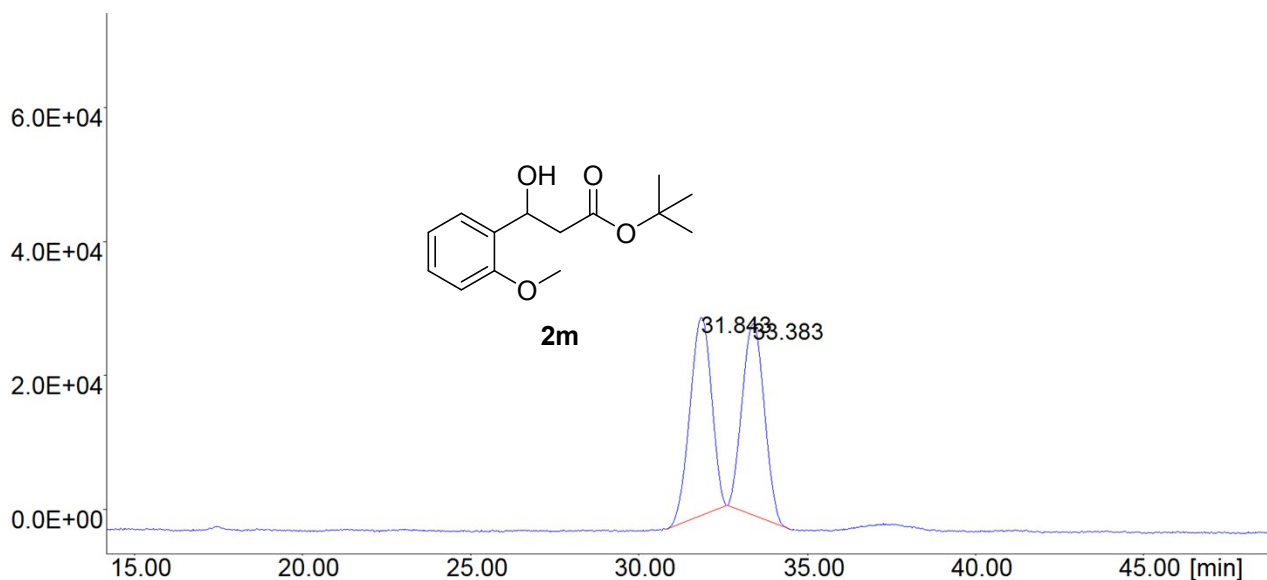

| # | Name | RT     | Height | Area        | %Area  |
|---|------|--------|--------|-------------|--------|
| 1 |      | 31.843 | 29630  | 1299067.076 | 50.222 |
| 2 |      | 33.383 | 28593  | 1287601.224 | 49.778 |

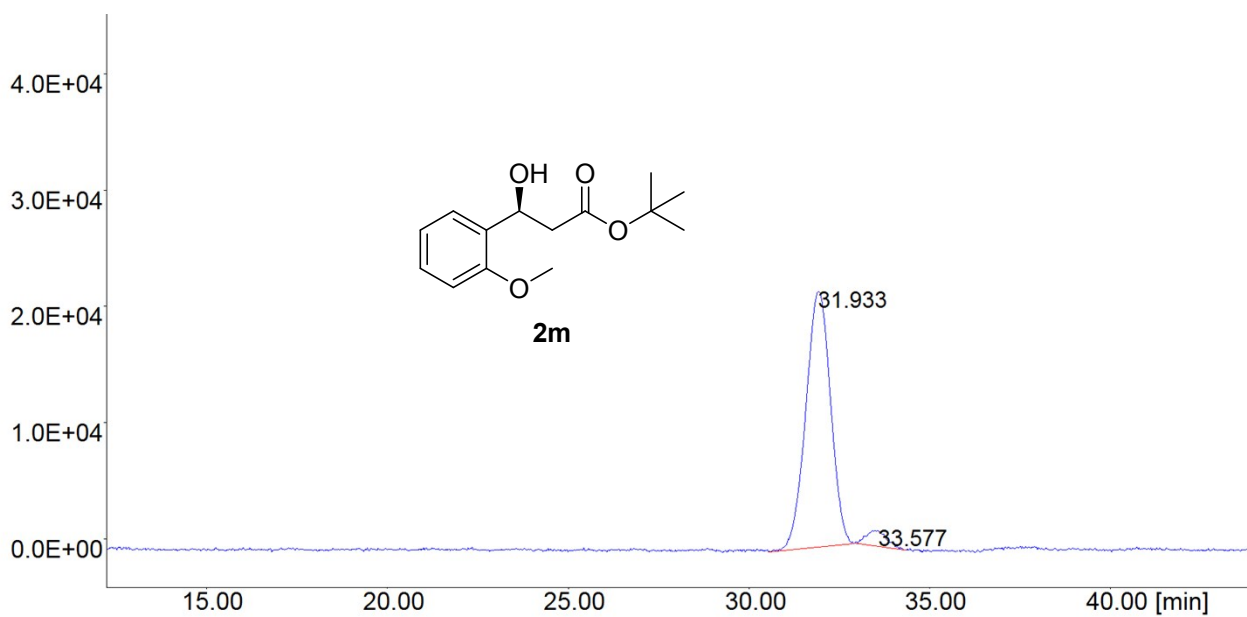

| # | Name | RT     | Height | Area        | %Area  |
|---|------|--------|--------|-------------|--------|
| 1 |      | 31.933 | 21976  | 1027699.719 | 95.080 |
| 2 |      | 33.577 | 1381   | 53183.528   | 4.920  |

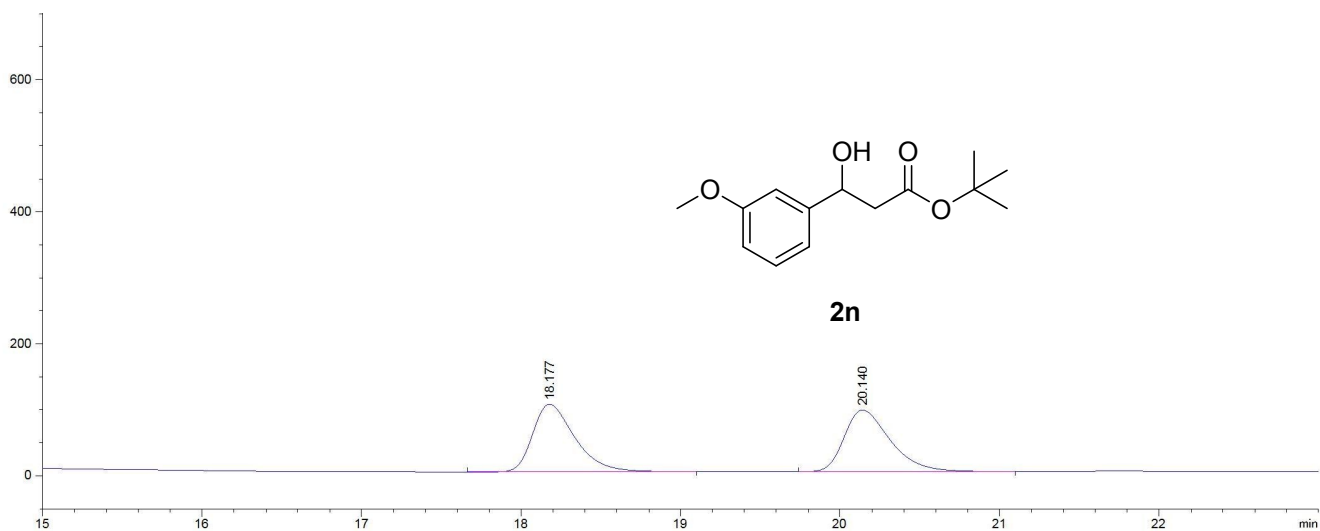

| # | Name | RT     | Height  | Area     | %Area  |
|---|------|--------|---------|----------|--------|
| 1 |      | 18.177 | 102.457 | 1890.410 | 50.135 |
| 2 |      | 20.140 | 93.501  | 1880.179 | 49.864 |

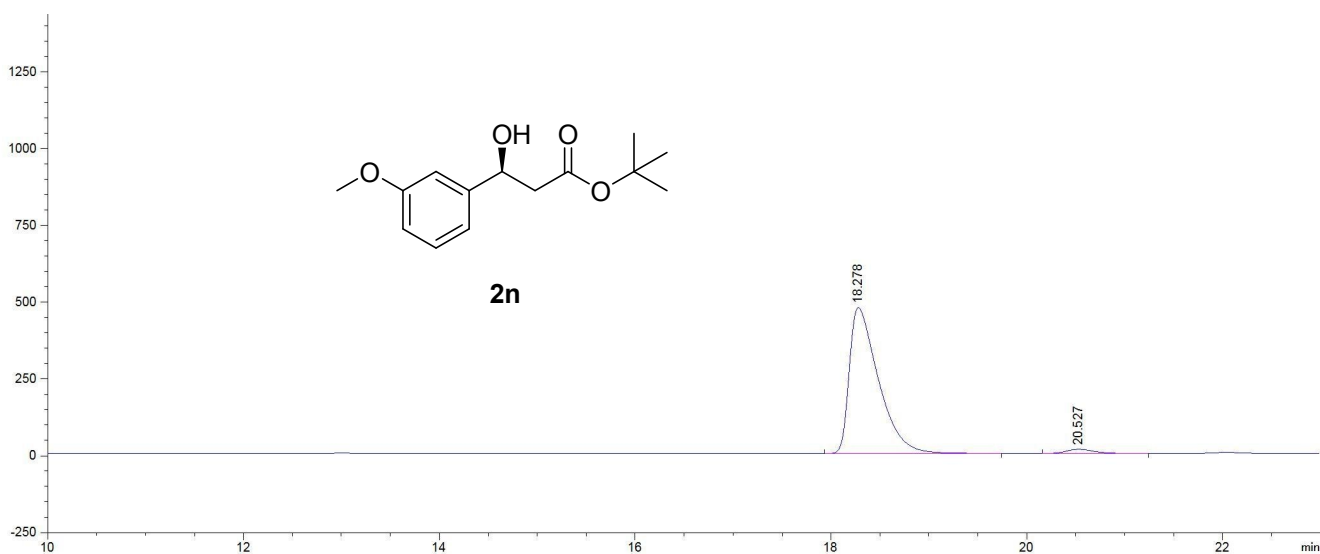

| # | Name | RT     | Height  | Area     | %Area   |
|---|------|--------|---------|----------|---------|
| 1 |      | 18.278 | 475.749 | 9842.300 | 97.2168 |
| 2 |      | 20.527 | 13.878  | 281.774  | 2.7832  |

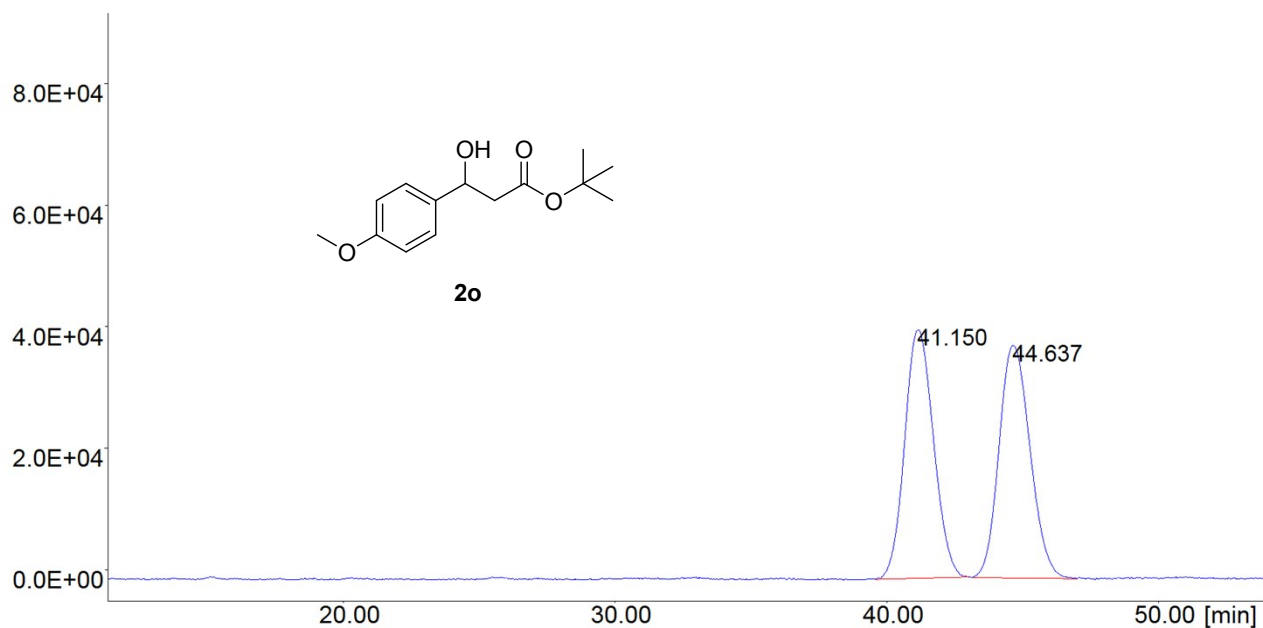

| # | Name | RT     | Height | Area        | %Area  |
|---|------|--------|--------|-------------|--------|
| 1 |      | 41.150 | 40895  | 2969893.936 | 49.893 |
| 2 |      | 44.637 | 38200  | 2982680.351 | 50.107 |

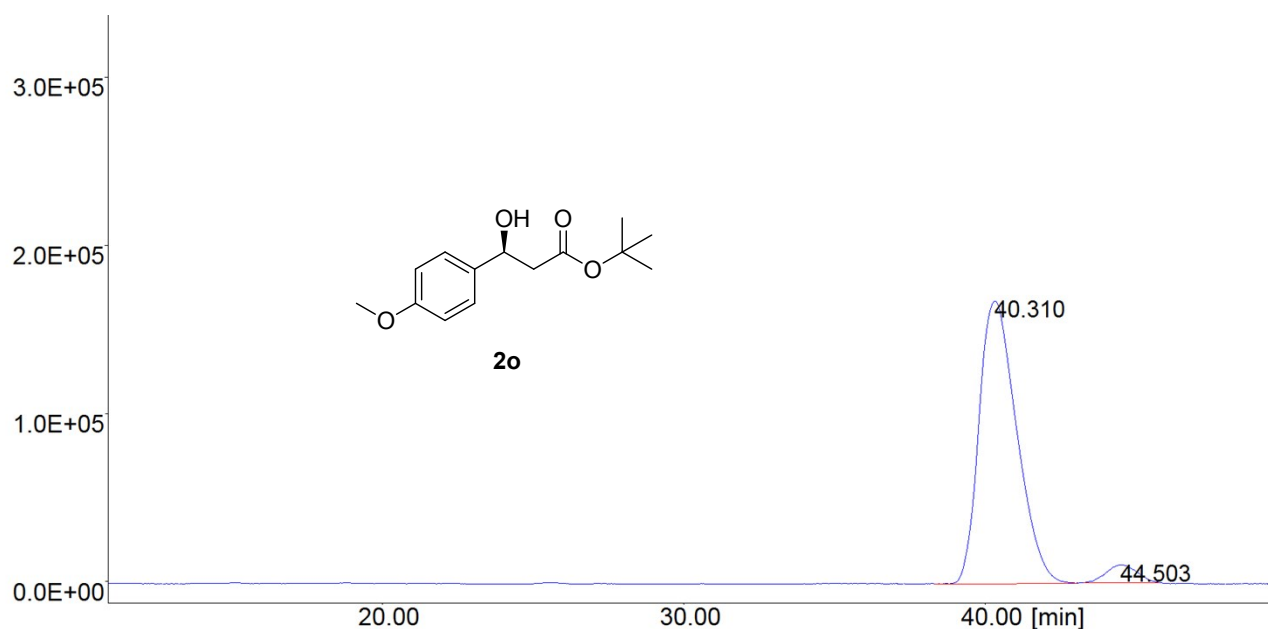

| # | Name | RT     | Height | Area         | %Area  |
|---|------|--------|--------|--------------|--------|
| 1 |      | 40.310 | 168016 | 14387046.731 | 95.042 |
| 2 |      | 44.503 | 10584  | 750512.269   | 4.958  |



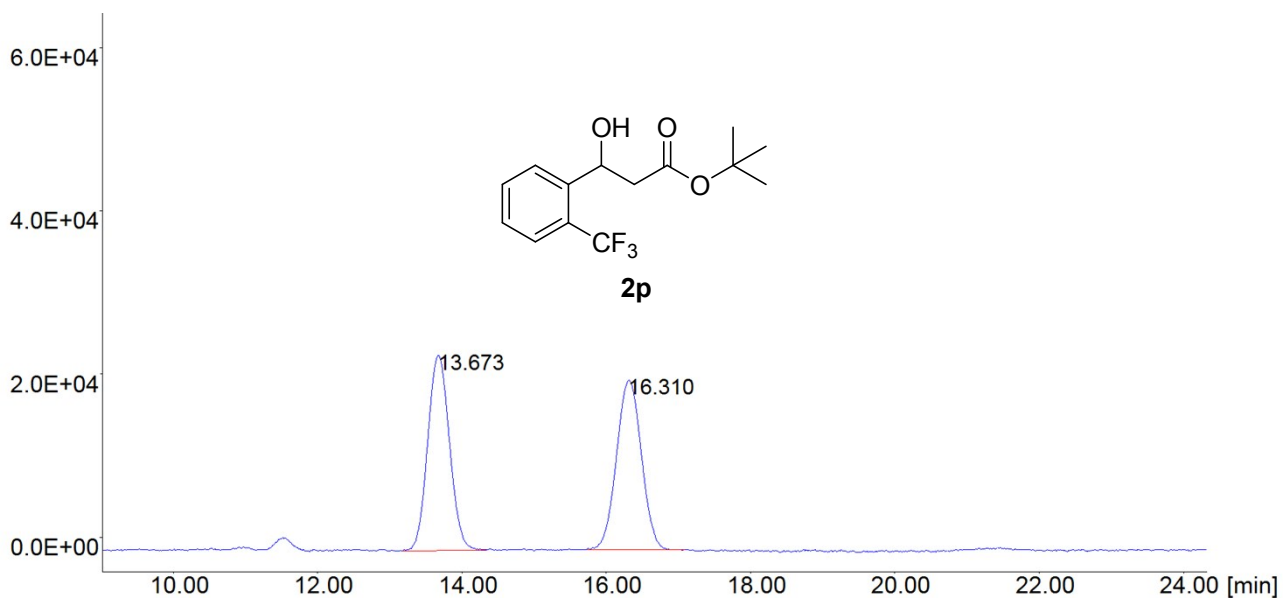

| # | Name | RT     | Height | Area       | %Area  |
|---|------|--------|--------|------------|--------|
| 1 |      | 13.673 | 23853  | 491938.402 | 50.121 |
| 2 |      | 16.310 | 20795  | 489566.824 | 49.879 |

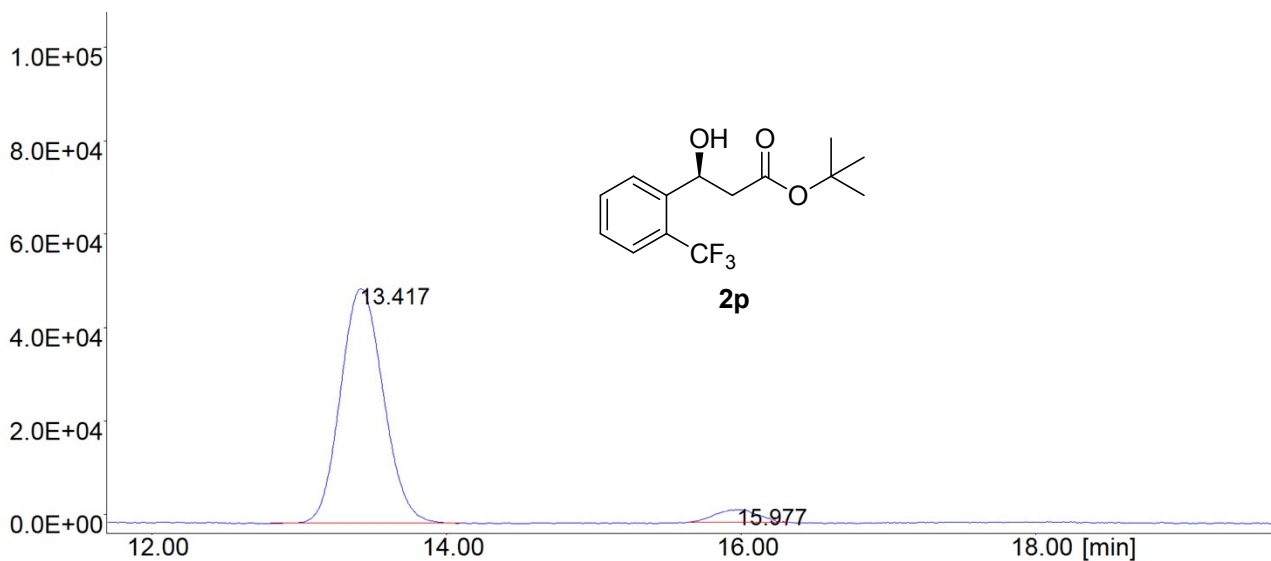

| # | Name | RT     | Height | Area        | %Area  |
|---|------|--------|--------|-------------|--------|
| 1 |      | 13.417 | 50153  | 1002682.633 | 94.981 |
| 2 |      | 15.977 | 2635   | 52980.627   | 5.019  |

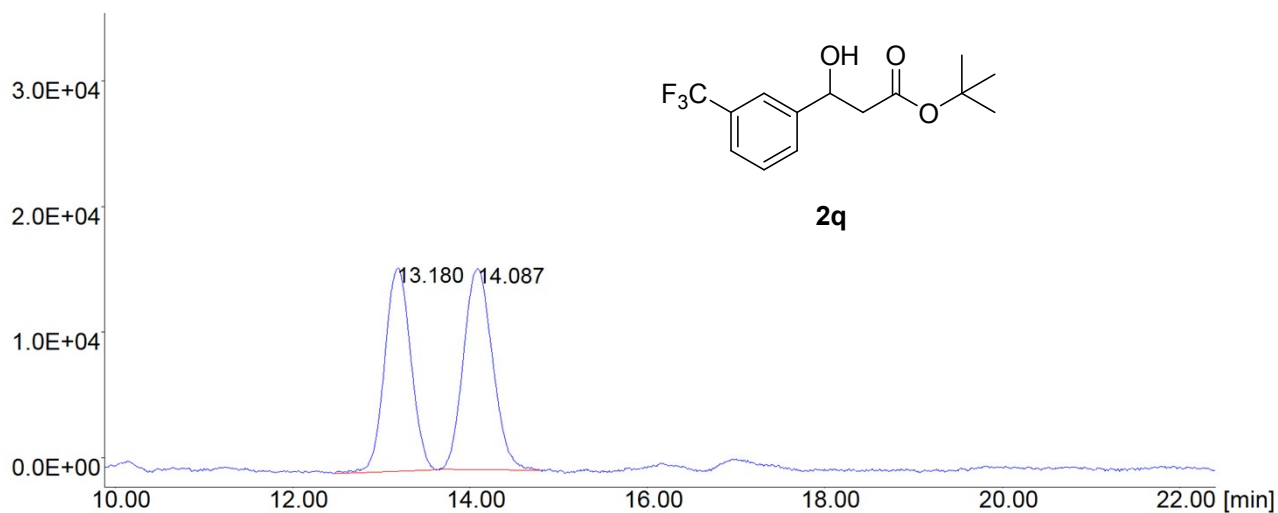

| # | Name | RT     | Height | Area       | %Area  |
|---|------|--------|--------|------------|--------|
| 1 |      | 13.180 | 16200  | 325898.631 | 47.571 |
| 2 |      | 14.087 | 16008  | 359178.383 | 52.429 |

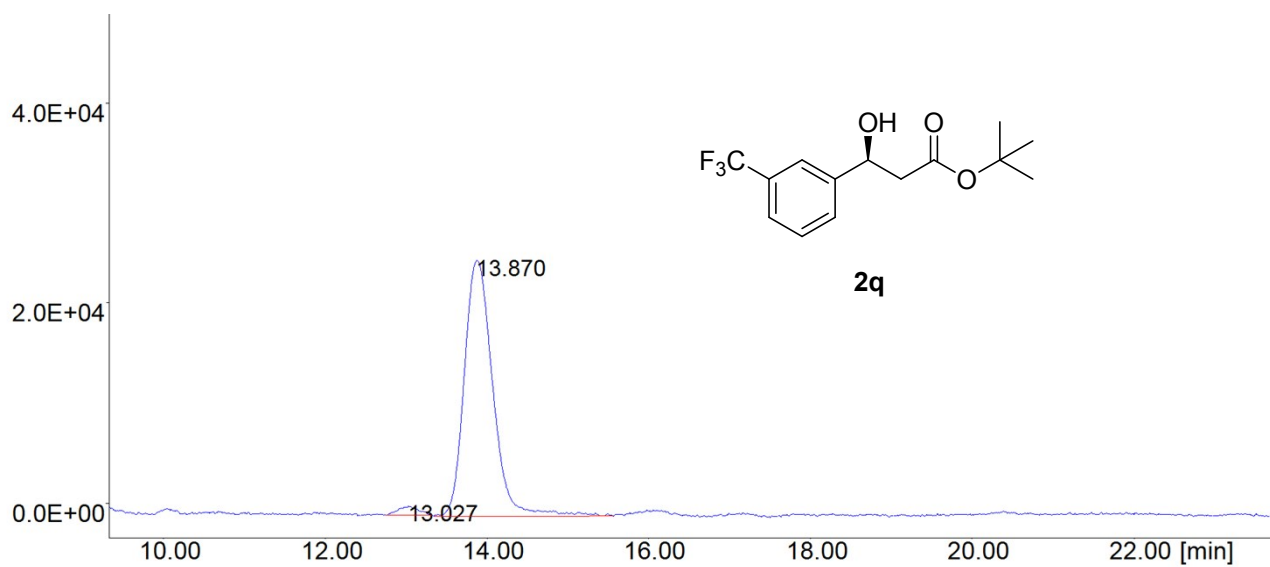

| # | Name | RT     | Height | Area       | %Area  |
|---|------|--------|--------|------------|--------|
| 1 |      | 13.027 | 925    | 16017.600  | 2.530  |
| 2 |      | 13.870 | 25557  | 617033.115 | 97.470 |

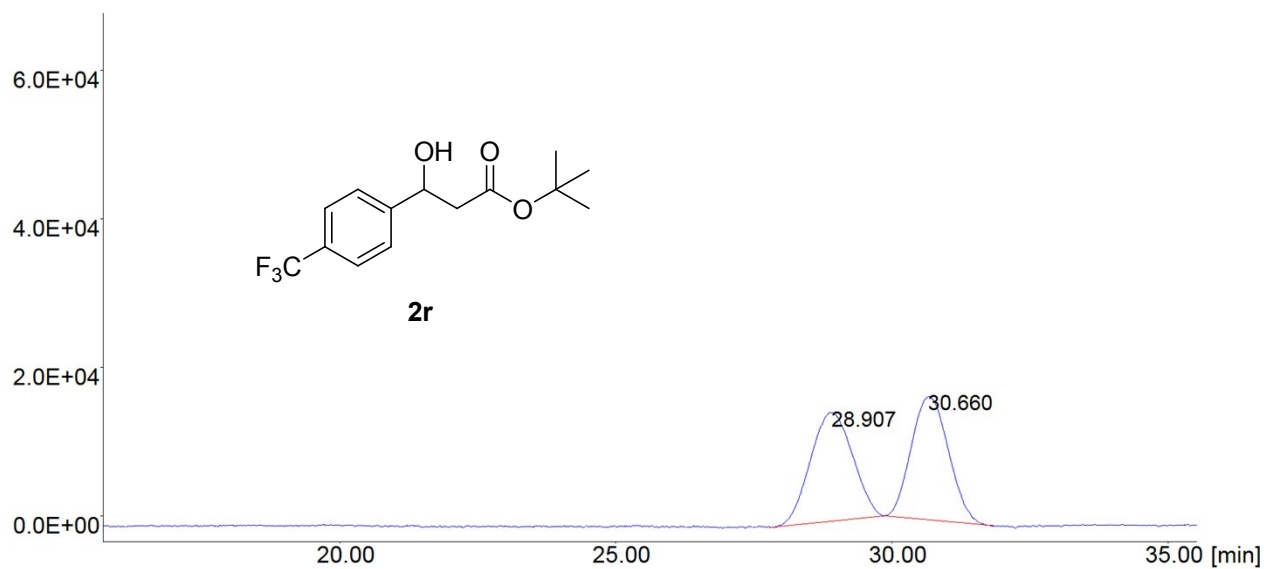

| # | Name | RT     | Height | Area       | %Area  |
|---|------|--------|--------|------------|--------|
| 1 |      | 28.907 | 14609  | 773602.992 | 50.010 |
| 2 |      | 30.660 | 16647  | 773290.619 | 49.990 |

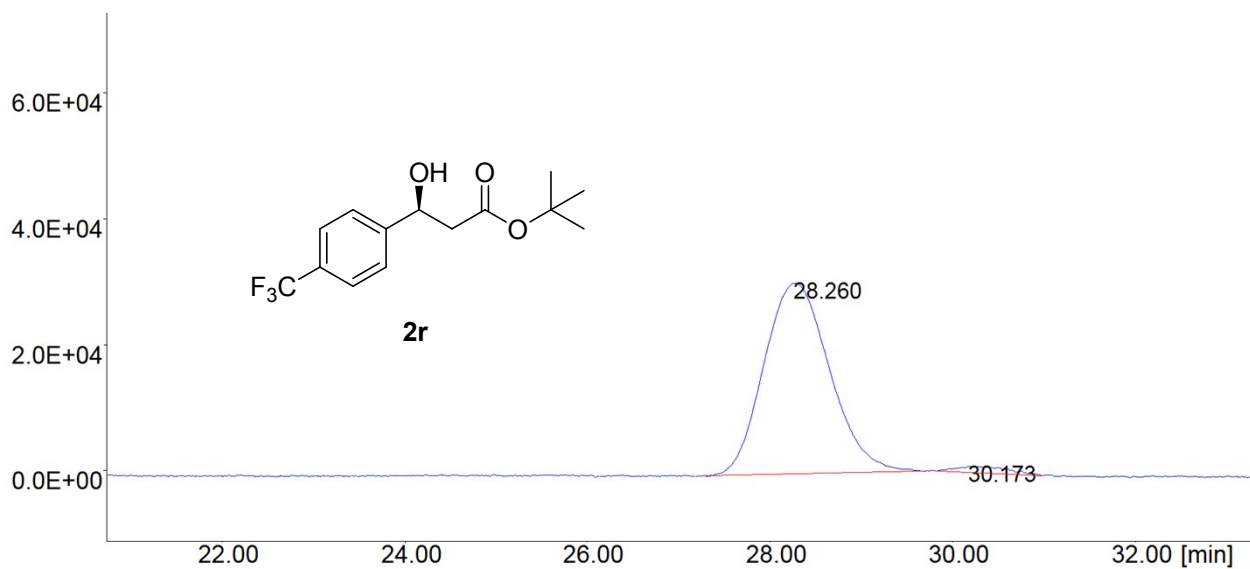

| # | Name | RT     | Height | Area        | %Area  |
|---|------|--------|--------|-------------|--------|
| 1 |      | 28.260 | 30360  | 1508978.620 | 97.540 |
| 2 |      | 30.173 | 909    | 38062.803   | 2.460  |

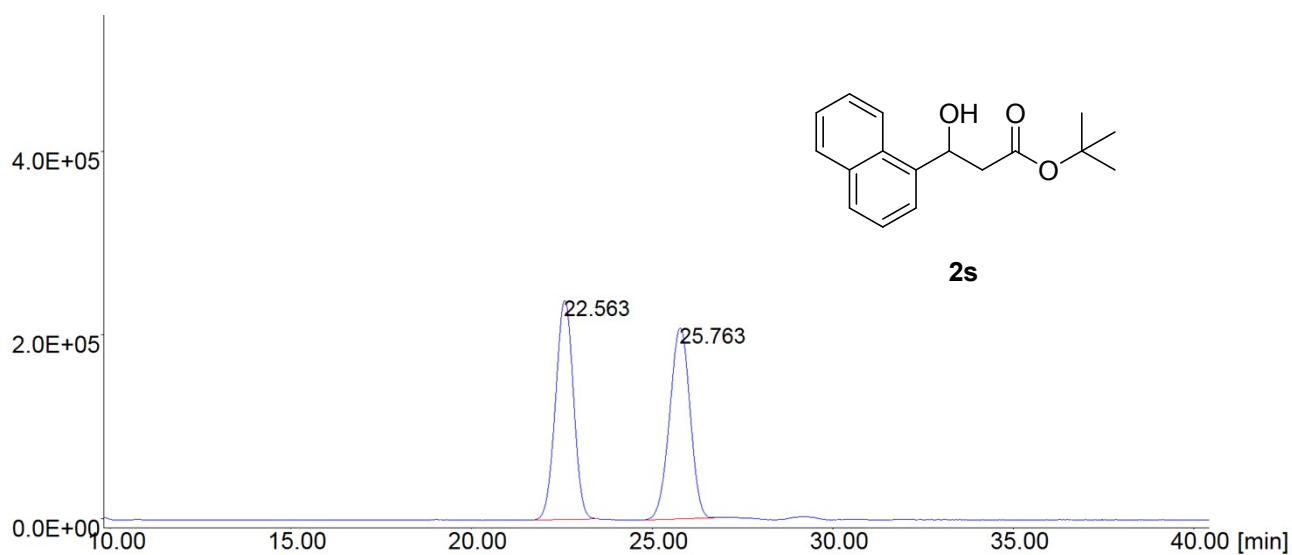

| # | Name | RT     | Height | Area        | %Area  |
|---|------|--------|--------|-------------|--------|
| 1 |      | 22.563 | 237956 | 8026585.110 | 50.133 |
| 2 |      | 25.763 | 207327 | 7984116.926 | 49.867 |

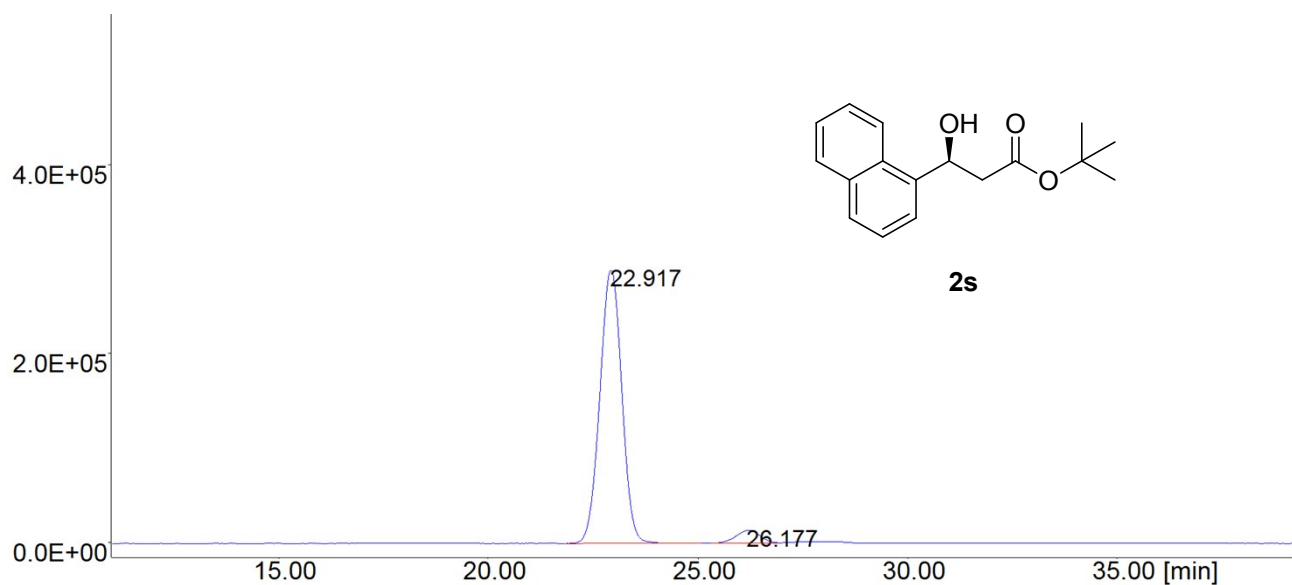

| # | Name | RT     | Height | Area         | %Area  |
|---|------|--------|--------|--------------|--------|
| 1 |      | 22.917 | 289009 | 10251062.372 | 95.303 |
| 2 |      | 26.177 | 12992  | 505210.209   | 4.697  |

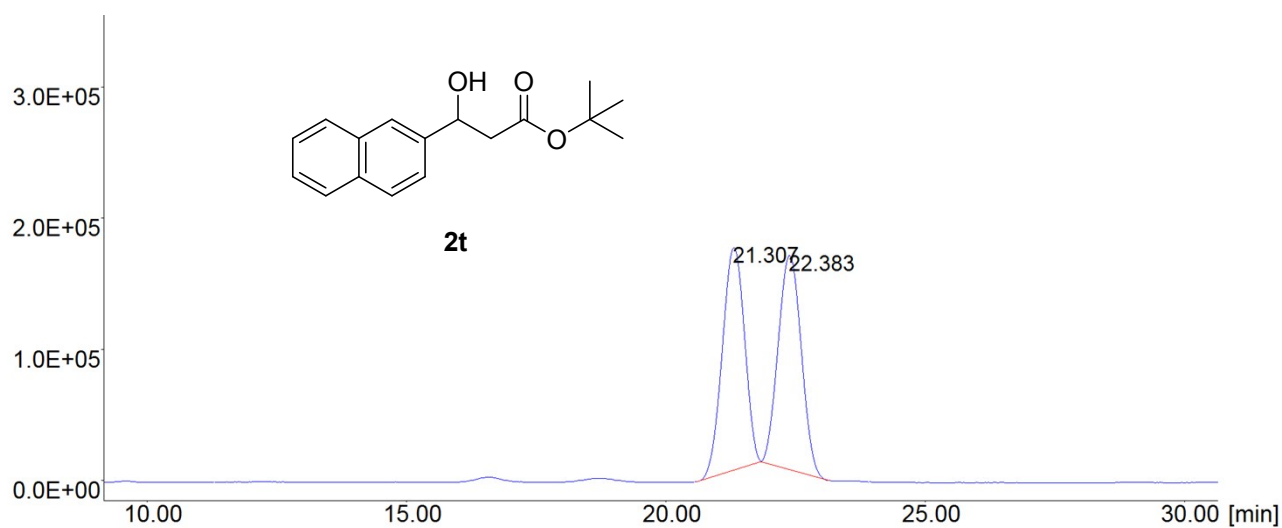

| # | Name | RT     | Height | Area        | %Area  |
|---|------|--------|--------|-------------|--------|
| 1 |      | 21.307 | 169552 | 4943624.924 | 49.941 |
| 2 |      | 22.383 | 162960 | 4955241.717 | 50.059 |

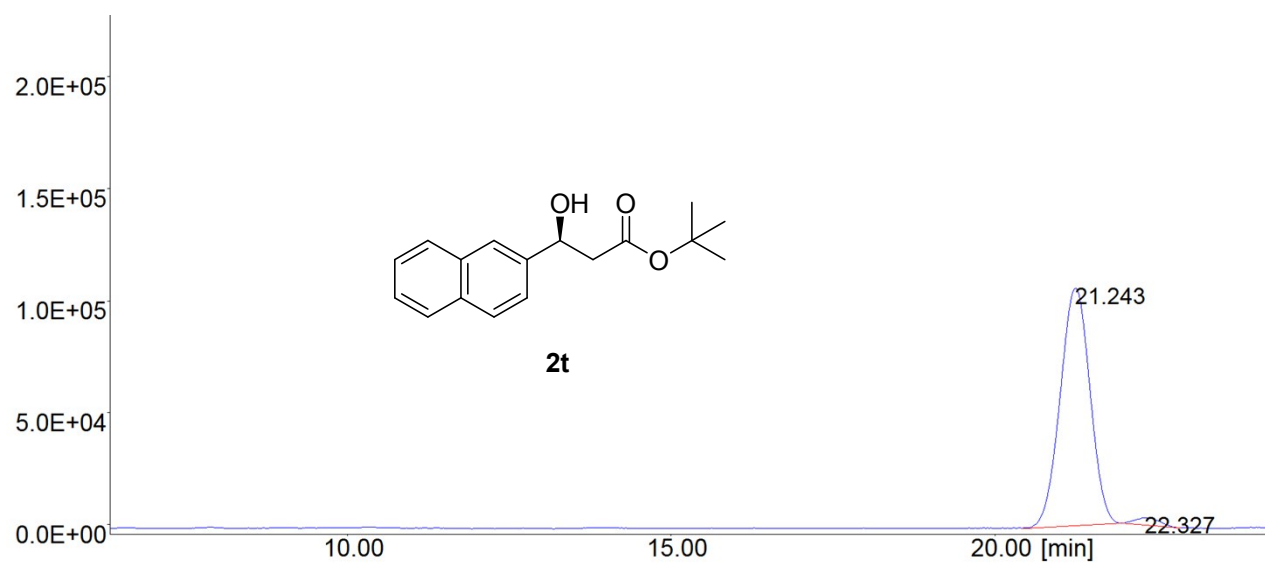

| # | Name | RT     | Height | Area        | %Area  |
|---|------|--------|--------|-------------|--------|
| 1 |      | 21.243 | 105957 | 3339287.760 | 97.417 |
| 2 |      | 22.327 | 3305   | 88557.600   | 2.583  |

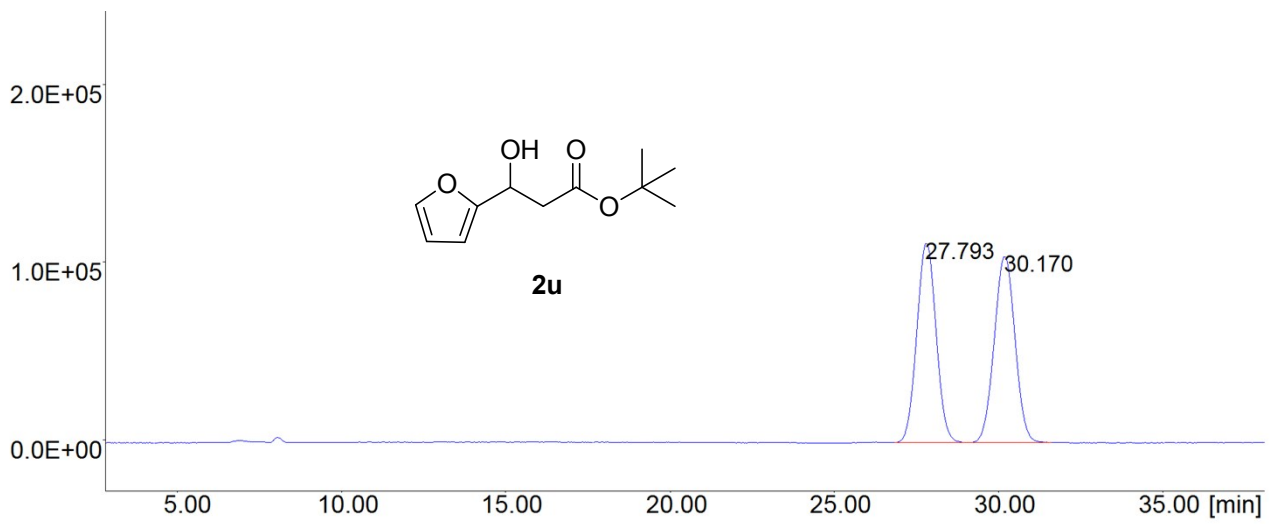

| # | Name | RT     | Height | Area        | %Area  |
|---|------|--------|--------|-------------|--------|
| 1 |      | 27.793 | 112155 | 4489836.300 | 49.895 |
| 2 |      | 30.170 | 104641 | 4508762.366 | 50.105 |

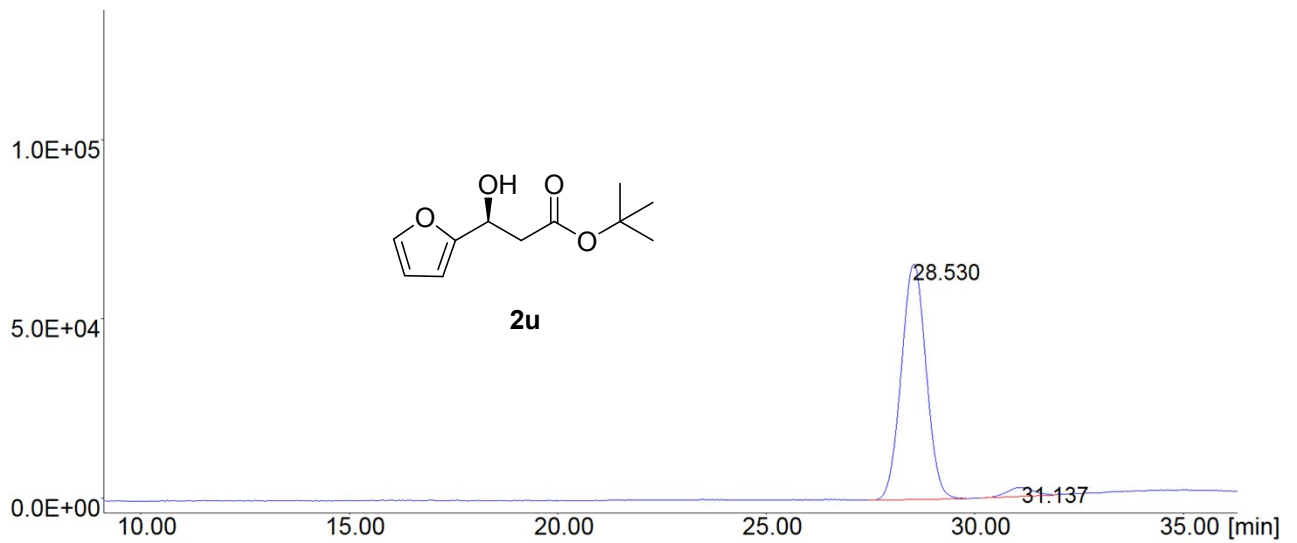

| # | Name | RT     | Height | Area        | %Area  |
|---|------|--------|--------|-------------|--------|
| 1 |      | 28.530 | 65639  | 2668621.954 | 96.022 |
| 2 |      | 31.137 | 2573   | 110555.213  | 3.978  |

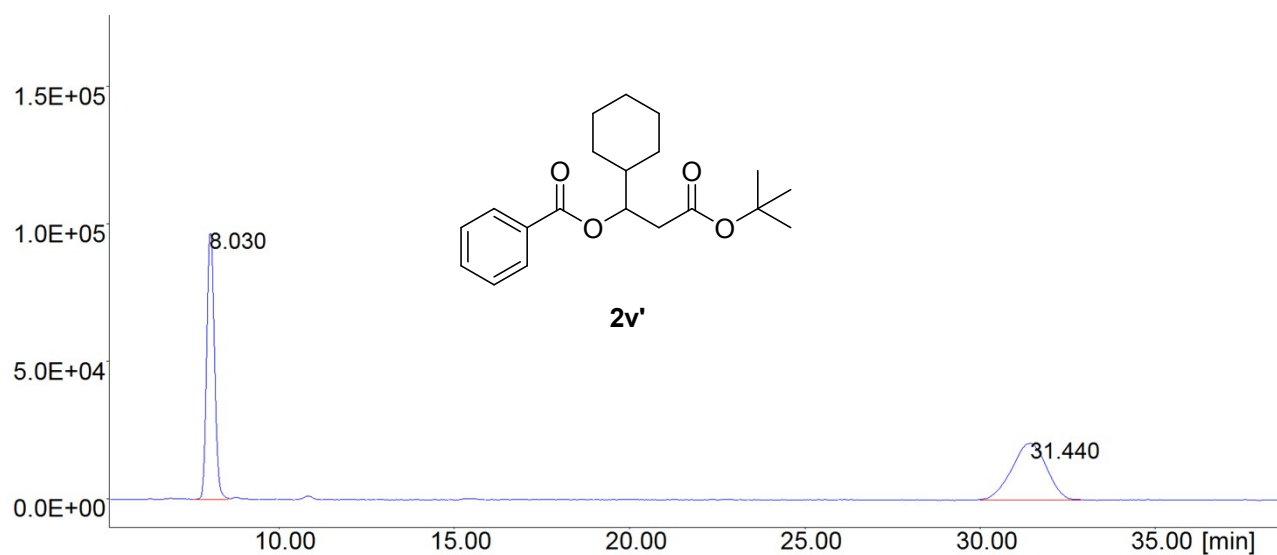

| # | Name | RT     | Height | Area        | %Area  |
|---|------|--------|--------|-------------|--------|
| 1 |      | 8.030  | 96843  | 1396628.600 | 49.911 |
| 2 |      | 31.440 | 20668  | 1401630.662 | 50.089 |

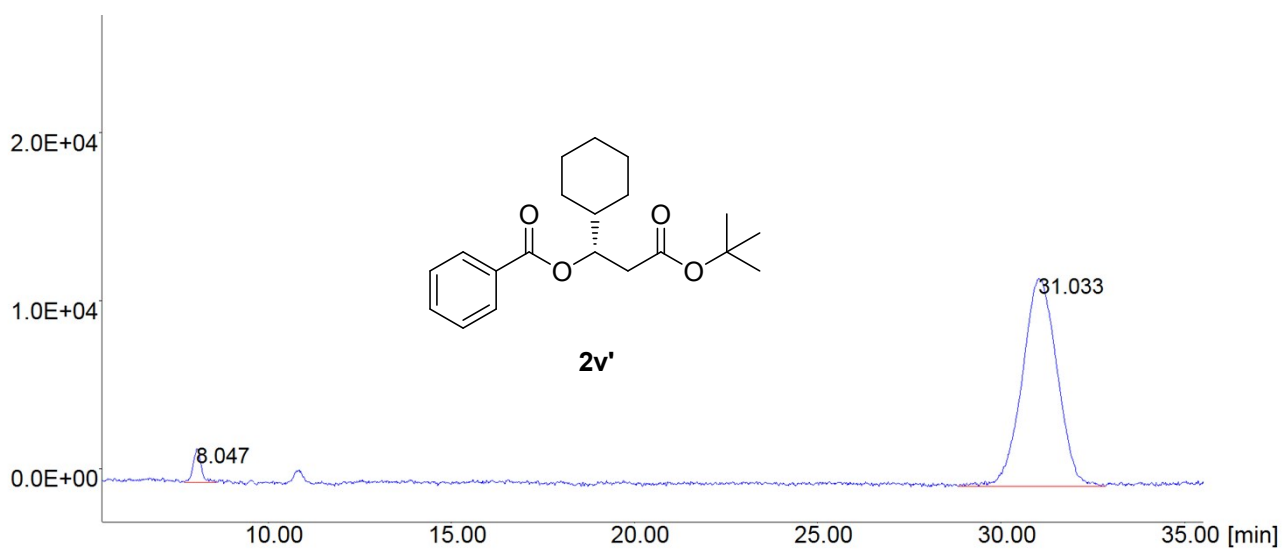

| # | Name | RT     | Height | Area       | %Area  |
|---|------|--------|--------|------------|--------|
| 1 |      | 8.047  | 2040   | 30492.600  | 3.614  |
| 2 |      | 31.033 | 12361  | 813209.802 | 96.386 |

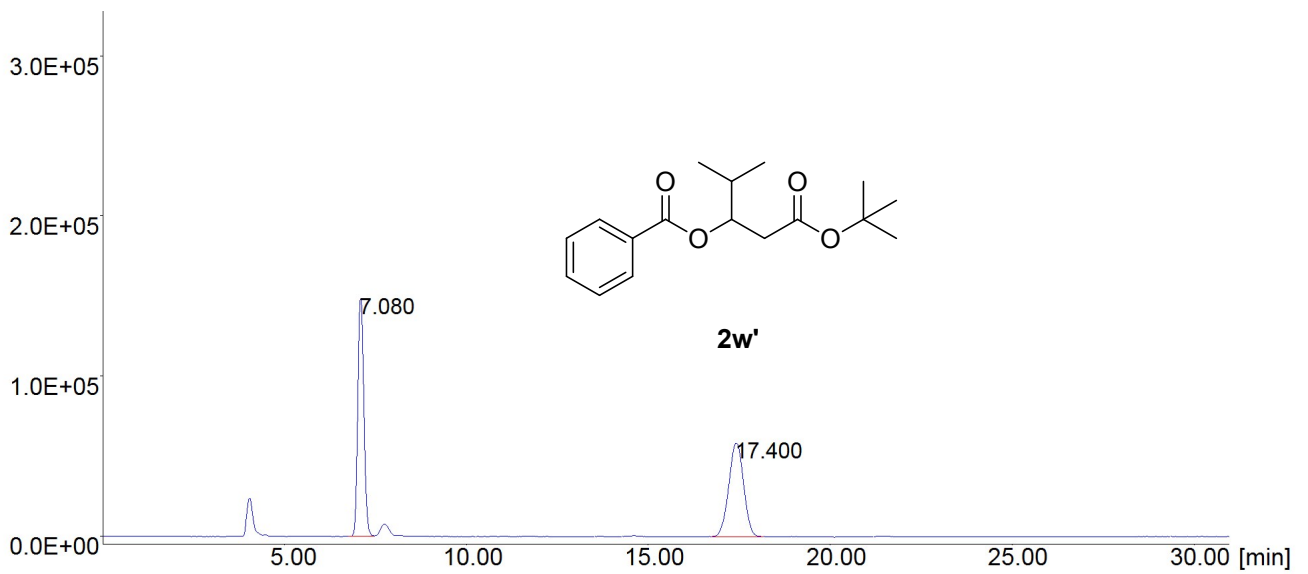

| # | Name | RT     | Height | Area        | %Area  |
|---|------|--------|--------|-------------|--------|
| 1 |      | 7.080  | 148264 | 1582437.743 | 49.476 |
| 2 |      | 17.400 | 58548  | 1615937.409 | 50.524 |

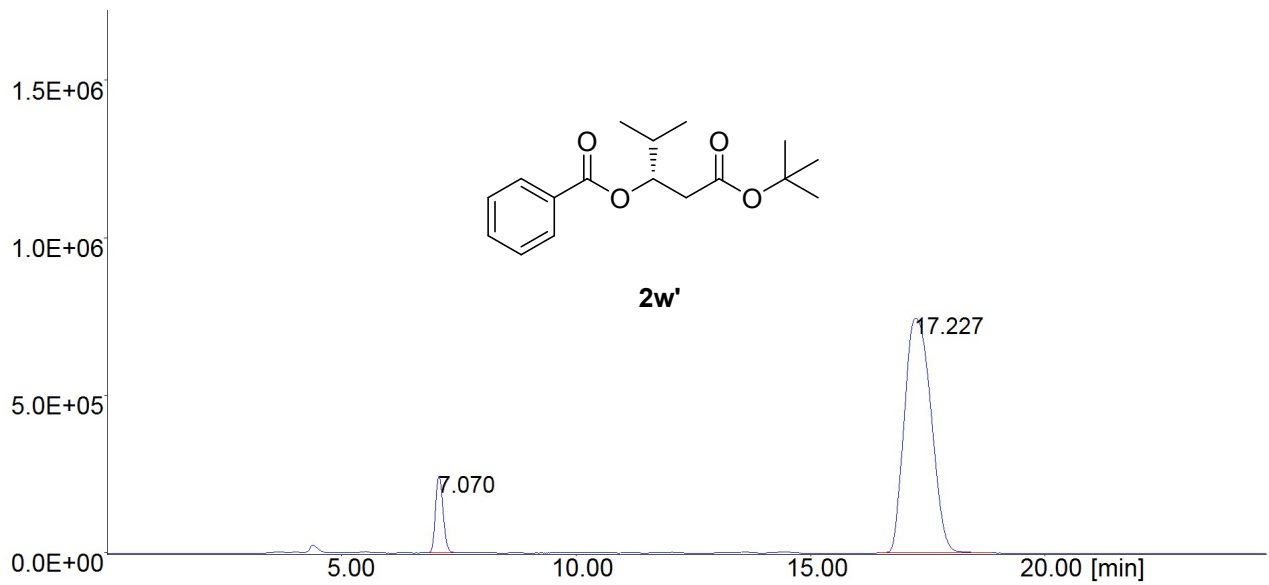

| # | Name | RT     | Height | Area         | %Area  |
|---|------|--------|--------|--------------|--------|
| 1 |      | 7.070  | 241031 | 2524249.000  | 8.022  |
| 2 |      | 17.227 | 743928 | 28941490.501 | 91.978 |



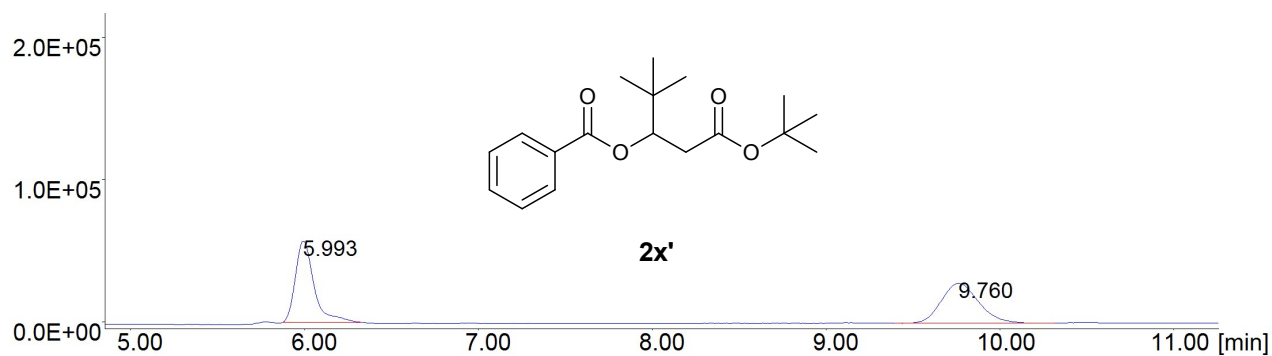

| # | Name | RT    | Height | Area       | %Area  |
|---|------|-------|--------|------------|--------|
| 1 |      | 5.993 | 57157  | 423205.459 | 50.036 |
| 2 |      | 9.760 | 28182  | 422602.364 | 49.964 |

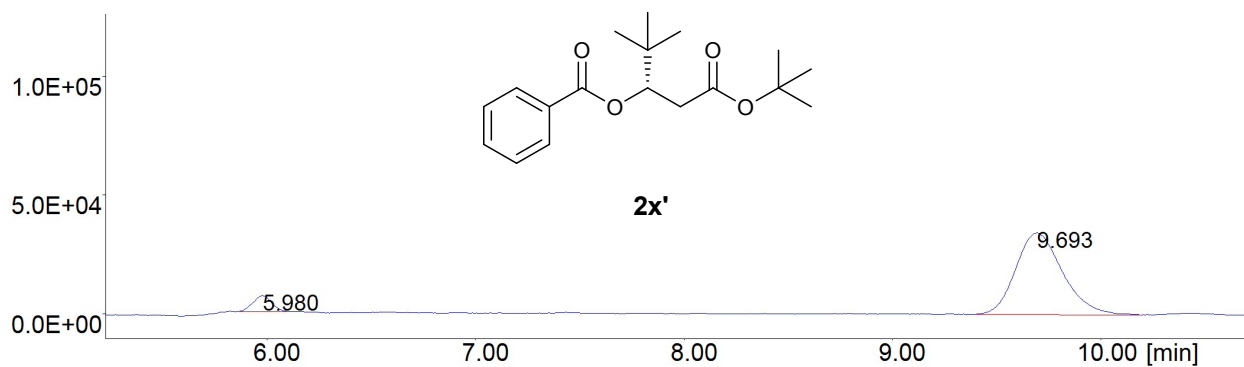

| # | Name | RT    | Height | Area       | %Area  |
|---|------|-------|--------|------------|--------|
| 1 |      | 5.980 | 6645   | 40593.200  | 7.046  |
| 2 |      | 9.693 | 34302  | 535554.600 | 92.954 |

### 3. The comparative kinetic study of the ligands

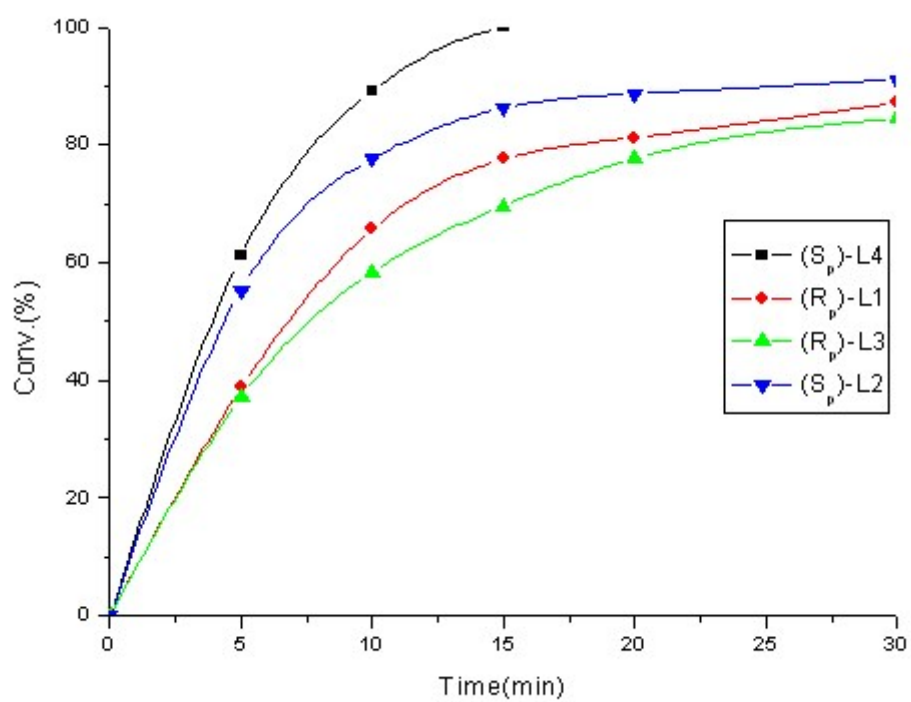

Supplement: c6ra14404g1.pdf [file c6ra14404g1.pdf]
